# Supplementary material for: Cheminformatics Models for Inhibitors ofSchistosoma mansoniThioredoxin Glutathione Reductase
Source: Hindawi journal article supplement (doi:10.1155/2014/957107), 2014-01-01
Supplement: f1 [file 957107.f1.zip]

**Supplementary Table 1. Descriptors generated by PowerMV used for model generation**

| Pharmacophore<br>Fingerprint                                                                                                                                                                                                                                                                                                                                                                                                                                                                                                                                                                                                                                                                                                                                                                                                                                                                                                                                                                                                                                                                    | Weighted Burden Number                                                                                                                                                                                                                                                                                                          | Property                                                             |
|-------------------------------------------------------------------------------------------------------------------------------------------------------------------------------------------------------------------------------------------------------------------------------------------------------------------------------------------------------------------------------------------------------------------------------------------------------------------------------------------------------------------------------------------------------------------------------------------------------------------------------------------------------------------------------------------------------------------------------------------------------------------------------------------------------------------------------------------------------------------------------------------------------------------------------------------------------------------------------------------------------------------------------------------------------------------------------------------------|---------------------------------------------------------------------------------------------------------------------------------------------------------------------------------------------------------------------------------------------------------------------------------------------------------------------------------|----------------------------------------------------------------------|
| NEG_01_NEG, NEG_02_NEG,<br>NEG_03_NEG, NEG_04_NEG,<br>NEG_05_NEG, NEG_06_NEG,<br>NEG_07_NEG, NEG_03_POS,<br>NEG_04_POS, NEG_05_POS, NEG_06_POS,<br>NEG_07_POS, NEG_01_HBD,<br>NEG_02_HBD, NEG_03_HBD,<br>NEG_04_HBD, NEG_05_HBD,<br>NEG_06_HBD, NEG_07_HBD,<br>NEG_03_HBA, NEG_04_HBA,<br>NEG_05_HBA, NEG_06_HBA,<br>NEG_07_HBA, NEG_02_ARC,<br>NEG_03_ARC, NEG_04_ARC, NEG_05_ARC,<br>NEG_06_ARC, NEG_07_ARC, NEG_02_HYP,<br>NEG_03_HYP, NEG_04_HYP, NEG_05_HYP,<br>NEG_06_HYP, NEG_07_HYP, POS_03_POS,<br>POS_04_POS, POS_05_POS, POS_06_POS,<br>POS_07_POS, POS_02_HBD, POS_03_HBD,<br>POS_04_HBD, POS_05_HBD, POS_06_HBD,<br>POS_07_HBD, POS_03_HBA, POS_04_HBA,<br>POS_05_HBA, POS_06_HBA, POS_07_HBA,<br>POS_02_ARC, POS_03_ARC, POS_04_ARC,<br>POS_05_ARC, POS_06_ARC, POS_07_ARC,<br>POS_02_HYP, POS_03_HYP, POS_04_HYP,<br>POS_05_HYP, POS_06_HYP, POS_07_HYP,<br>HBD_03_HBD, HBD_04_HBD,<br>HBD_05_HBD, HBD_06_HBD,<br>HBD_07_HBD, HBD_03_HBA,<br>HBD_04_HBA, HBD_05_HBA,<br>HBD_06_HBA, HBD_07_HBA,<br>HBD_02_ARC, HBD_03_ARC,<br>HBD_04_ARC, HBD_05_ARC,<br>HBD_06_ARC, HBD_07_ARC, | WBN_GC_L_0.25<br>WBN_GC_H_0.25<br>WBN_GC_L_0.50<br>WBN_GC_H_0.50<br>WBN_GC_L_0.75<br>WBN_GC_H_0.75<br>WBN_GC_L_1.00<br>WBN_GC_H_1.00<br>WBN_EN_L_0.25<br>WBN_EN_H_0.25<br>WBN_EN_L_0.50<br>WBN_EN_H_0.50<br>WBN_EN_L_0.75<br>WBN_EN_H_0.75<br>WBN_EN_L_1.00<br>WBN_EN_H_1.00<br>WBN_LP_L_0.25<br>WBN_LP_H_0.25<br>WBN_LP_L_0.50 | XLogP<br>PSA,<br>NumRot<br>NumHBA<br>NumHBD<br>MW<br>BBB<br>BadGroup |

|                                                                                                                                                                                                                                                                                                                                                                                                                                                                                                                                                                  |                                                                                                   |  |
|------------------------------------------------------------------------------------------------------------------------------------------------------------------------------------------------------------------------------------------------------------------------------------------------------------------------------------------------------------------------------------------------------------------------------------------------------------------------------------------------------------------------------------------------------------------|---------------------------------------------------------------------------------------------------|--|
| HBD_02_HYP, HBD_03_HYP, HBD_04_HYP,<br>HBD_05_HYP, HBD_06_HYP, HBD_07_HYP,<br>HBA_03_HBA, HBA_04_HBA,<br>HBA_05_HBA, HBA_06_HBA,<br>HBA_07_HBA, HBA_03_ARC,<br>HBA_04_ARC, HBA_05_ARC, HBA_06_ARC,<br>HBA_07_ARC, HBA_02_HYP, HBA_03_HYP,<br>HBA_04_HYP, HBA_05_HYP, HBA_06_HYP,<br>HBA_07_HYP, ARC_01_ARC, ARC_02_ARC,<br>ARC_03_ARC, ARC_04_ARC, ARC_05_ARC,<br>ARC_06_ARC, ARC_07_ARC, ARC_02_HYP,<br>ARC_03_HYP, ARC_04_HYP, ARC_05_HYP,<br>ARC_06_HYP, ARC_07_HYP, HYP_01_HYP,<br>HYP_02_HYP, HYP_03_HYP, HYP_04_HYP,<br>HYP_05_HYP, HYP_06_HYP, HYP_07_HYP | WBN_LP_H_0.50<br><br>WBN_LP_L_0.75<br><br>WBN_LP_H_0.75<br><br>WBN_LP_L_1.00<br><br>WBN_LP_H_1.00 |  |
|------------------------------------------------------------------------------------------------------------------------------------------------------------------------------------------------------------------------------------------------------------------------------------------------------------------------------------------------------------------------------------------------------------------------------------------------------------------------------------------------------------------------------------------------------------------|---------------------------------------------------------------------------------------------------|--|
