# Supplementary material for: Cheminformatics Models for Inhibitors ofSchistosoma mansoniThioredoxin Glutathione Reductase
Source: Hindawi journal article supplement (doi:10.1155/2014/957107), 2014-01-01
Supplement: f1 [file 957107.f1.zip]

| ZINC ID      | Score    |
|--------------|----------|
| ZINC00029419 | -35.4065 |
| ZINC00031384 | -43.9474 |
| ZINC00033431 | -40.1489 |
| ZINC00035479 | -43.3154 |
| ZINC00035767 | -32.9451 |
| ZINC00036001 | -41.5307 |
| ZINC00036591 | -34.2997 |
| ZINC00039770 | -29.1791 |
| ZINC00041425 | -56.3369 |
| ZINC00043595 | -22.2464 |
| ZINC00045275 | -35.8514 |
| ZINC00046095 | -49.7614 |
| ZINC00046317 | -38.3916 |
| ZINC00046974 | -38.827  |
| ZINC00047437 | -39.2751 |
| ZINC00050403 | -35.9263 |
| ZINC00050690 | -33.2651 |
| ZINC00052187 | -23.4364 |
| ZINC00053229 | -34.5762 |
| ZINC00053333 | -39.4016 |
| ZINC00055289 | -33.2697 |
| ZINC00056824 | -31.7013 |
| ZINC00058746 | -42.3069 |
| ZINC00060296 | -33.0636 |
| ZINC00060583 | -39.0426 |
| ZINC00061237 | -45.0092 |
| ZINC00062303 | -42.8968 |
| ZINC00064741 | -29.6017 |
| ZINC00069043 | -34.8322 |
| ZINC00071347 | -40.5886 |
| ZINC00074748 | -24.9066 |
| ZINC00077036 | -42.5125 |
| ZINC00079639 | -39.1211 |
| ZINC00079780 | -36.8772 |
| ZINC00080961 | -41.6617 |
| ZINC00081961 | -32.0892 |
| ZINC00082693 | -36.6511 |
| ZINC00082693 | -36.7642 |
| ZINC00084059 | -41.1837 |
| ZINC00088053 | -27.9192 |
| ZINC00088053 | -29.564  |
| ZINC00088053 | -33.2721 |
| ZINC00088377 | -23.4829 |

|              |          |
|--------------|----------|
| ZINC00088377 | -26.6893 |
| ZINC00089932 | -35.1137 |
| ZINC00091744 | -38.45   |
| ZINC00094766 | -30.4281 |
| ZINC00097057 | -35.8652 |
| ZINC00099679 | -32.9405 |
| ZINC00100424 | -41.0532 |
| ZINC00101922 | -39.2992 |
| ZINC00106339 | -34.992  |
| ZINC00106339 | -37.2116 |
| ZINC00107648 | -44.2946 |
| ZINC00108853 | -37.2552 |
| ZINC00113377 | -29.0993 |
| ZINC00116637 | -39.3323 |
| ZINC00117177 | -24.9898 |
| ZINC00118143 | -43.3649 |
| ZINC00118217 | -44.8451 |
| ZINC00119806 | -38.4778 |
| ZINC00121572 | -41.8709 |
| ZINC00121609 | -34.0103 |
| ZINC00121719 | -40.0467 |
| ZINC00121932 | -28.4458 |
| ZINC00121932 | -33.3728 |
| ZINC00122457 | -33.5152 |
| ZINC00122457 | -38.817  |
| ZINC00123403 | -26.6853 |
| ZINC00125499 | -23.9157 |
| ZINC00126739 | -46.3883 |
| ZINC00129993 | -39.6982 |
| ZINC00130218 | -41.3668 |
| ZINC00131172 | -37.4993 |
| ZINC00133192 | -31.9145 |
| ZINC00136226 | -33.8939 |
| ZINC00136467 | -39.9097 |
| ZINC00137308 | -40.8541 |
| ZINC00138617 | -33.5808 |
| ZINC00138952 | -42.1329 |
| ZINC00140238 | -30.9567 |
| ZINC00142267 | -29.17   |
| ZINC00142897 | -43.2738 |
| ZINC00144912 | -31.0657 |
| ZINC00147978 | -38.0907 |
| ZINC00149389 | -47.5128 |
| ZINC00150280 | -38.959  |

|              |          |
|--------------|----------|
| ZINC00152077 | -44.6143 |
| ZINC00152584 | -31.7953 |
| ZINC00152748 | -33.6875 |
| ZINC00157862 | -26.182  |
| ZINC00159222 | -35.6348 |
| ZINC00159296 | -33.0968 |
| ZINC00160771 | -34.4616 |
| ZINC00160907 | -28.2789 |
| ZINC00160956 | -39.8948 |
| ZINC00161461 | -36.7126 |
| ZINC00162517 | -39.4127 |
| ZINC00165143 | -32.7829 |
| ZINC00166492 | -39.0763 |
| ZINC00169269 | -32.1259 |
| ZINC00169407 | -38.1702 |
| ZINC00170315 | -30.2935 |
| ZINC00171717 | -28.8171 |
| ZINC00172191 | -34.5529 |
| ZINC00174403 | -28.5743 |
| ZINC00177204 | -39.6403 |
| ZINC00178637 | -30.5259 |
| ZINC00181988 | -40.1091 |
| ZINC00182406 | -34.6364 |
| ZINC00185245 | -37.3492 |
| ZINC00188097 | -34.7771 |
| ZINC00188443 | -31.574  |
| ZINC00190290 | -37.3673 |
| ZINC00201151 | -35.5552 |
| ZINC00201760 | -33.9051 |
| ZINC00204764 | -36.5039 |
| ZINC00207046 | -35.1472 |
| ZINC00216851 | -36.6872 |
| ZINC00226286 | -40.021  |
| ZINC00226395 | -39.091  |
| ZINC00233184 | -41.9999 |
| ZINC00234648 | -33.4525 |
| ZINC00235897 | -26.2765 |
| ZINC00238055 | -26.2634 |
| ZINC00239675 | -34.2551 |
| ZINC00240614 | -36.9979 |
| ZINC00241369 | -32.9071 |
| ZINC00241891 | -26.3578 |
| ZINC00245243 | -32.326  |
| ZINC00248726 | -46.1775 |

|              |          |
|--------------|----------|
| ZINC00258082 | -46.7783 |
| ZINC00260955 | -30.1667 |
| ZINC00264796 | -35.8008 |
| ZINC00264796 | -37.8357 |
| ZINC00267172 | -37.3859 |
| ZINC00268925 | -27.0258 |
| ZINC00273637 | -36.8872 |
| ZINC00276501 | -34.1573 |
| ZINC00283212 | -37.8165 |
| ZINC00283212 | -39.4228 |
| ZINC00283212 | -39.5727 |
| ZINC00284400 | -33.3228 |
| ZINC00294969 | -38.713  |
| ZINC00298877 | -44.5326 |
| ZINC00302993 | -32.7779 |
| ZINC00303306 | -41.5848 |
| ZINC00304562 | -33.2919 |
| ZINC00307252 | -34.1982 |
| ZINC00308478 | -40.5593 |
| ZINC00308802 | -39.5829 |
| ZINC00309112 | -39.3996 |
| ZINC00313331 | -39.0707 |
| ZINC00314085 | -34.8222 |
| ZINC00315262 | -46.8381 |
| ZINC00319174 | -27.8622 |
| ZINC00334175 | -30.7715 |
| ZINC00334610 | -33.367  |
| ZINC00342018 | -37.3899 |
| ZINC00343409 | -29.2677 |
| ZINC00343409 | -29.305  |
| ZINC00345298 | -32.1886 |
| ZINC00346282 | -30.7445 |
| ZINC00351830 | -43.1077 |
| ZINC00358065 | -41.6389 |
| ZINC00358153 | -42.2447 |
| ZINC00360674 | -34.6314 |
| ZINC00363216 | -33.8462 |
| ZINC00366036 | -32.0835 |
| ZINC00369329 | -37.5428 |
| ZINC00375133 | -35.8476 |
| ZINC00377690 | -27.7197 |
| ZINC00377690 | -27.8751 |
| ZINC00384181 | -38.0356 |
| ZINC00385972 | -45.4368 |

|              |          |
|--------------|----------|
| ZINC00393751 | -36.7624 |
| ZINC00396729 | -31.4911 |
| ZINC00398316 | -29.5369 |
| ZINC00399397 | -35.7235 |
| ZINC00399725 | -37.1443 |
| ZINC00406051 | -32.7003 |
| ZINC00407016 | -32.2051 |
| ZINC00411924 | -23.0673 |
| ZINC00418553 | -38.9305 |
| ZINC00424160 | -44.7585 |
| ZINC00428845 | -39.8238 |
| ZINC00428868 | -36.6067 |
| ZINC00431989 | -40.7941 |
| ZINC00432577 | -22.315  |
| ZINC00442081 | -45.147  |
| ZINC00442636 | -36.5993 |
| ZINC00442905 | -33.7179 |
| ZINC00444743 | -34.7315 |
| ZINC00446378 | -45.5765 |
| ZINC00450090 | -39.5777 |
| ZINC00450090 | -45.0122 |
| ZINC00451971 | -43.9853 |
| ZINC00452686 | -37.3472 |
| ZINC00454967 | -31.8606 |
| ZINC00455180 | -43.2716 |
| ZINC00458394 | -33.086  |
| ZINC00466477 | -35.5261 |
| ZINC00466589 | -37.8381 |
| ZINC00470992 | -39.6429 |
| ZINC00472790 | -45.8054 |
| ZINC00480505 | -37.3972 |
| ZINC00480898 | -35.062  |
| ZINC00482089 | -24.6598 |
| ZINC00489701 | -31.1146 |
| ZINC00496754 | -45.5822 |
| ZINC00502361 | -33.7474 |
| ZINC00504208 | -44.5168 |
| ZINC00511765 | -36.5176 |
| ZINC00512747 | -38.8398 |
| ZINC00513900 | -39.1005 |
| ZINC00519872 | -35.9896 |
| ZINC00525510 | -33.2296 |
| ZINC00529385 | -33.9733 |
| ZINC00529598 | -34.6371 |

|              |          |
|--------------|----------|
| ZINC00535895 | -32.9347 |
| ZINC00536678 | -40.5418 |
| ZINC00540112 | -31.8191 |
| ZINC00540686 | -33.0181 |
| ZINC00544877 | -41      |
| ZINC00546282 | -41.2319 |
| ZINC00551104 | -26.7502 |
| ZINC00557400 | -47.1351 |
| ZINC00569097 | -39.1169 |
| ZINC00569287 | -42.3846 |
| ZINC00586924 | -45.1106 |
| ZINC00607738 | -34.5614 |
| ZINC00608460 | -38.7209 |
| ZINC00608539 | -36.3714 |
| ZINC00611221 | -38.2032 |
| ZINC00611492 | -27.3121 |
| ZINC00615708 | -34.5229 |
| ZINC00629159 | -35.2339 |
| ZINC00629159 | -37.6913 |
| ZINC00631983 | -34.0995 |
| ZINC00636874 | -22.26   |
| ZINC00638272 | -41.1609 |
| ZINC00647604 | -36.2643 |
| ZINC00649653 | -20.3736 |
| ZINC00658645 | -44.7329 |
| ZINC00658859 | -23.6257 |
| ZINC00661058 | -28.8134 |
| ZINC00672183 | -43.1476 |
| ZINC00672660 | -22.0034 |
| ZINC00679225 | -35.0311 |
| ZINC00679857 | -37.2814 |
| ZINC00679857 | -41.3232 |
| ZINC00685554 | -45.9953 |
| ZINC00702761 | -35.0678 |
| ZINC00702761 | -37.158  |
| ZINC00702985 | -22.2509 |
| ZINC00702985 | -35.7341 |
| ZINC00704786 | -43.1977 |
| ZINC00705601 | -27.9828 |
| ZINC00706420 | -35.359  |
| ZINC00706993 | -37.7716 |
| ZINC00707906 | -32.36   |
| ZINC00707998 | -22.4167 |
| ZINC00707998 | -34.1437 |

|              |          |
|--------------|----------|
| ZINC00709616 | -28.6625 |
| ZINC00709760 | -23.8978 |
| ZINC00711123 | -42.6037 |
| ZINC00711510 | -48.3684 |
| ZINC00715098 | -34.5998 |
| ZINC00715098 | -40.4499 |
| ZINC00715191 | -33.2358 |
| ZINC00718787 | -35.4191 |
| ZINC00719751 | -28.9011 |
| ZINC00726049 | -43.0663 |
| ZINC00752396 | -27.9707 |
| ZINC00752673 | -31.7585 |
| ZINC00754071 | -45.8701 |
| ZINC00754499 | -36.9304 |
| ZINC00756387 | -58.3891 |
| ZINC00756481 | -47.0712 |
| ZINC00758785 | -37.5238 |
| ZINC00759378 | -36.2584 |
| ZINC00779527 | -37.2026 |
| ZINC00780017 | -38.3826 |
| ZINC00784737 | -35.8334 |
| ZINC00785610 | -34.4867 |
| ZINC00793636 | -46.084  |
| ZINC00793641 | -44.1756 |
| ZINC00794193 | -38.5447 |
| ZINC00800617 | -42.897  |
| ZINC00802087 | -36.7144 |
| ZINC00809035 | -42.2378 |
| ZINC00809713 | -26.3752 |
| ZINC00812893 | -40.6281 |
| ZINC00815409 | -40.4755 |
| ZINC00815942 | -19.6974 |
| ZINC00815942 | -26.3772 |
| ZINC00818052 | -34.3609 |
| ZINC00819837 | -44.5194 |
| ZINC00826077 | -42.8138 |
| ZINC00834057 | -26.5417 |
| ZINC00836693 | -43.3815 |
| ZINC00843126 | -30.971  |
| ZINC00846390 | -40.0424 |
| ZINC00852736 | -41.3414 |
| ZINC00858244 | -23.2453 |
| ZINC00858244 | -30.9092 |
| ZINC00859465 | -27.7509 |

|              |          |
|--------------|----------|
| ZINC00860456 | -39.6116 |
| ZINC00865852 | -37.0038 |
| ZINC00866587 | -34.0579 |
| ZINC00871781 | -37.2405 |
| ZINC00874565 | -34.2621 |
| ZINC00875618 | -20.5024 |
| ZINC00885896 | -38.2862 |
| ZINC00889558 | -31.766  |
| ZINC00893020 | -35.1261 |
| ZINC00894522 | -28.4706 |
| ZINC00909935 | -33.8135 |
| ZINC00918515 | -40.2404 |
| ZINC00937251 | -34.7757 |
| ZINC00937251 | -40.0123 |
| ZINC00939449 | -45.861  |
| ZINC00940727 | -36.256  |
| ZINC00940727 | -39.1134 |
| ZINC00943956 | -22.9496 |
| ZINC00944363 | -34.7556 |
| ZINC00944363 | -37.8014 |
| ZINC00944607 | -30.6203 |
| ZINC00945436 | -39.6245 |
| ZINC00945516 | -34.4212 |
| ZINC00949672 | -40.5148 |
| ZINC00950491 | -54.4086 |
| ZINC00951503 | -42.0278 |
| ZINC00951867 | -22.3493 |
| ZINC00951867 | -27.612  |
| ZINC00959824 | -38.8083 |
| ZINC00966922 | -48.7255 |
| ZINC00967213 | -33.6862 |
| ZINC00967336 | -25.8404 |
| ZINC00968032 | -29.1299 |
| ZINC00972005 | -43.1685 |
| ZINC00972636 | -46.9245 |
| ZINC00973346 | -37.4779 |
| ZINC00981686 | -31.7275 |
| ZINC00987628 | -39.131  |
| ZINC00997049 | -41.6353 |
| ZINC00999306 | -37.8102 |
| ZINC01000817 | -38.6373 |
| ZINC01001991 | -47.9622 |
| ZINC01003509 | -35.1391 |
| ZINC01003709 | -31.1202 |



|              |          |
|--------------|----------|
| ZINC01008543 | -34.6515 |
| ZINC01011102 | -38.9275 |
| ZINC01012108 | -36.326  |
| ZINC01012880 | -44.5117 |
| ZINC01022004 | -44.671  |
| ZINC01023577 | -36.1013 |
| ZINC01034980 | -47.4871 |
| ZINC01037256 | -33.2341 |
| ZINC01037256 | -37.055  |
| ZINC01037473 | -34.5321 |
| ZINC01039311 | -33.731  |
| ZINC01041514 | -34.8571 |
| ZINC01047716 | -33.3086 |
| ZINC01049464 | -42.5345 |
| ZINC01054598 | -43.7234 |
| ZINC01057347 | -46.2236 |
| ZINC01061696 | -40.3592 |
| ZINC01061696 | -46.7612 |
| ZINC01063124 | -44.6247 |
| ZINC01063358 | -34.7368 |
| ZINC01065159 | -53.4003 |
| ZINC01067092 | -37.2411 |
| ZINC01069376 | -39.9867 |
| ZINC01073872 | -26.1511 |
| ZINC01080325 | -30.8919 |
| ZINC01083216 | -40.5406 |
| ZINC01085047 | -36.1079 |
| ZINC01095042 | -32.6765 |
| ZINC01095485 | -31.9207 |
| ZINC01104661 | -43.3038 |
| ZINC01117624 | -41.7342 |
| ZINC01122386 | -18.7157 |
| ZINC01124475 | -44.5208 |
| ZINC01124682 | -33.9521 |
| ZINC01126956 | -40.9767 |
| ZINC01129399 | -37.3401 |
| ZINC01134862 | -33.5705 |
| ZINC01137253 | -42.903  |
| ZINC01137718 | -42.7152 |
| ZINC01148456 | -42.7465 |
| ZINC01155134 | -45.9095 |
| ZINC01155392 | -36.4604 |
| ZINC01163088 | -37.6136 |
| ZINC01167736 | -50.5347 |

|              |          |
|--------------|----------|
| ZINC01172015 | -41.5414 |
| ZINC01175114 | -43.3705 |
| ZINC01175371 | -32.7292 |
| ZINC01176688 | -24.1899 |
| ZINC01177717 | -24.1546 |
| ZINC01181327 | -40.6923 |
| ZINC01184022 | -41.5364 |
| ZINC01185862 | -27.5892 |
| ZINC01186193 | -28.658  |
| ZINC01186817 | -48.5056 |
| ZINC01186979 | -28.027  |
| ZINC01191000 | -39.2731 |
| ZINC01198661 | -37.533  |
| ZINC01207046 | -35.3307 |
| ZINC01209276 | -40.0051 |
| ZINC01227048 | -37.8013 |
| ZINC01227048 | -40.7475 |
| ZINC01230112 | -45.9302 |
| ZINC01232441 | -47.7543 |
| ZINC01234699 | -40.0356 |
| ZINC01237813 | -39.1805 |
| ZINC01241575 | -34.3555 |
| ZINC01249916 | -32.9129 |
| ZINC01253459 | -41.9648 |
| ZINC01256160 | -47.2588 |
| ZINC01279942 | -50.9094 |
| ZINC01280966 | -28.0916 |
| ZINC01284498 | -46.144  |
| ZINC01297973 | -43.2618 |
| ZINC01298567 | -37.0216 |
| ZINC01302115 | -44.8031 |
| ZINC01309920 | -33.9967 |
| ZINC01318023 | -38.2248 |
| ZINC01322383 | -48.2695 |
| ZINC01337802 | -41.0686 |
| ZINC01339631 | -41.7925 |
| ZINC01339743 | -22.0428 |
| ZINC01371650 | -35.5547 |
| ZINC01372276 | -46.6009 |
| ZINC01378861 | -39.7971 |
| ZINC01382031 | -31.5214 |
| ZINC01383389 | -32.3598 |
| ZINC01383895 | -37.5357 |
| ZINC01384492 | -34.6987 |

|              |          |
|--------------|----------|
| ZINC01386238 | -33.2019 |
| ZINC01387077 | -38.1395 |
| ZINC01387672 | -29.9796 |
| ZINC01387672 | -29.9796 |
| ZINC01390217 | -46.9206 |
| ZINC01393335 | -31.4379 |
| ZINC01393442 | -42.6459 |
| ZINC01397081 | -36.2565 |
| ZINC01400755 | -40.733  |
| ZINC01403813 | -45.8505 |
| ZINC01404298 | -36.9761 |
| ZINC01411060 | -37.6309 |
| ZINC01411712 | -37.986  |
| ZINC01413461 | -34.3669 |
| ZINC01414699 | -30.2484 |
| ZINC01414699 | -36.174  |
| ZINC01416041 | -39.3443 |
| ZINC01421129 | -23.438  |
| ZINC01422749 | -26.5181 |
| ZINC01423146 | -44.3861 |
| ZINC01423401 | -37.8361 |
| ZINC01424215 | -44.5629 |
| ZINC01424907 | -47.197  |
| ZINC01426207 | -35.3521 |
| ZINC01429624 | -28.3425 |
| ZINC01438470 | -27.6922 |
| ZINC01441224 | -30.8225 |
| ZINC01442729 | -31.675  |
| ZINC01450928 | -42.2051 |
| ZINC01453682 | -34.1147 |
| ZINC01453793 | -26.7344 |
| ZINC01461539 | -21.9713 |
| ZINC01466177 | -42.9333 |
| ZINC01466744 | -41.7366 |
| ZINC01498997 | -38.5582 |
| ZINC01503141 | -35.5157 |
| ZINC01504547 | -35.2876 |
| ZINC01504762 | -34.486  |
| ZINC01504994 | -29.1293 |
| ZINC01506896 | -36.3709 |
| ZINC01507107 | -33.9876 |
| ZINC01510436 | -35.5631 |
| ZINC01510536 | -49.3463 |
| ZINC01510814 | -34.1936 |

|              |          |
|--------------|----------|
| ZINC01516227 | -44.232  |
| ZINC01527062 | -29.5815 |
| ZINC01542933 | -47.8788 |
| ZINC01542933 | -51.7998 |
| ZINC01559986 | -34.2842 |
| ZINC01560719 | -36.2892 |
| ZINC01580846 | -26.8675 |
| ZINC01584523 | -25.6088 |
| ZINC01590756 | -31.1888 |
| ZINC01591387 | -32.9481 |
| ZINC01592092 | -35.4367 |
| ZINC01593073 | -37.1324 |
| ZINC01598685 | -34.2623 |
| ZINC01600792 | -29.0771 |
| ZINC01608502 | -38.1747 |
| ZINC01612182 | -34.2659 |
| ZINC01616537 | -37.0604 |
| ZINC01619270 | -43.3503 |
| ZINC01625355 | -39.5814 |
| ZINC01628899 | -39.4972 |
| ZINC01629402 | -30.6353 |
| ZINC01665249 | -32.185  |
| ZINC01666940 | -29.9675 |
| ZINC01671447 | -37.0825 |
| ZINC01676371 | -30.0826 |
| ZINC01676678 | -41.1539 |
| ZINC01677185 | -25.2799 |
| ZINC01681286 | -29.7412 |
| ZINC01686454 | -37.0386 |
| ZINC01689598 | -23.0562 |
| ZINC01691068 | -28.4941 |
| ZINC01691268 | -23.6017 |
| ZINC01695178 | -25.4102 |
| ZINC01698058 | -42.1737 |
| ZINC01698412 | -27.9286 |
| ZINC01702395 | -36.1354 |
| ZINC01709355 | -39.0487 |
| ZINC01713662 | -35.7001 |
| ZINC01716666 | -26.8715 |
| ZINC01724835 | -26.8774 |
| ZINC01729149 | -34.8923 |
| ZINC01733994 | -37.9496 |
| ZINC01752741 | -38.4464 |
| ZINC01754675 | -34.535  |

|              |          |
|--------------|----------|
| ZINC01757791 | -52.618  |
| ZINC01760278 | -28.291  |
| ZINC01766558 | -27.878  |
| ZINC01769127 | -26.7869 |
| ZINC01808204 | -33.4432 |
| ZINC01819785 | -24.0916 |
| ZINC01848447 | -27.3114 |
| ZINC01870905 | -51.7768 |
| ZINC01871095 | -41.8023 |
| ZINC01888987 | -32.5355 |
| ZINC01908604 | -47.0237 |
| ZINC01934830 | -41.1914 |
| ZINC01945538 | -44.4789 |
| ZINC01954687 | -37.8185 |
| ZINC01957738 | -39.457  |
| ZINC01958016 | -44.8617 |
| ZINC01958016 | -48.4233 |
| ZINC01958642 | -31.1664 |
| ZINC02004082 | -32.5541 |
| ZINC02006683 | -33.0346 |
| ZINC02017337 | -32.2242 |
| ZINC02023069 | -37.8626 |
| ZINC02026023 | -40.6011 |
| ZINC02050429 | -31.9293 |
| ZINC02057295 | -40.2241 |
| ZINC02066524 | -33.0975 |
| ZINC02071256 | -39.6293 |
| ZINC02075264 | -37.8238 |
| ZINC02077785 | -27.672  |
| ZINC02088226 | -40.811  |
| ZINC02095851 | -40.9422 |
| ZINC02104517 | -41.2303 |
| ZINC02106698 | -34.1593 |
| ZINC02121521 | -47.3121 |
| ZINC02129020 | -42.409  |
| ZINC02140305 | -30.4134 |
| ZINC02141082 | -41.287  |
| ZINC02159000 | -44.9083 |
| ZINC02163846 | -38.1479 |
| ZINC02166229 | -49.6999 |
| ZINC02167865 | -38.5477 |
| ZINC02169599 | -27.4453 |
| ZINC02169734 | -28.0137 |
| ZINC02171586 | -40.2444 |

|              |          |
|--------------|----------|
| ZINC02173202 | -36.181  |
| ZINC02184354 | -41.1915 |
| ZINC02198926 | -29.9477 |
| ZINC02200308 | -30.3591 |
| ZINC02201186 | -35.0765 |
| ZINC02203848 | -47.1134 |
| ZINC02219710 | -42.1342 |
| ZINC02245908 | -14.4035 |
| ZINC02247503 | -38.7234 |
| ZINC02252669 | -33.6218 |
| ZINC02257295 | -41.1812 |
| ZINC02260243 | -35.165  |
| ZINC02260243 | -42.1854 |
| ZINC02260619 | -24.2688 |
| ZINC02271750 | -33.1459 |
| ZINC02272188 | -44.1827 |
| ZINC02288758 | -35.3743 |
| ZINC02289168 | -38.0347 |
| ZINC02297243 | -34.1615 |
| ZINC02304358 | -29.2546 |
| ZINC02304855 | -30.4464 |
| ZINC02306208 | -43.4083 |
| ZINC02309184 | -43.538  |
| ZINC02309350 | -37.9546 |
| ZINC02312740 | -27.5045 |
| ZINC02316538 | -45.6416 |
| ZINC02317230 | -39.8155 |
| ZINC02334363 | -36.813  |
| ZINC02334745 | -29.9867 |
| ZINC02357721 | -45.5524 |
| ZINC02359613 | -40.2205 |
| ZINC02359704 | -37.412  |
| ZINC02360611 | -34.7001 |
| ZINC02364159 | -27.1759 |
| ZINC02367932 | -42.7745 |
| ZINC02369241 | -36.6971 |
| ZINC02384115 | -24.8176 |
| ZINC02387828 | -34.9073 |
| ZINC02391801 | -47.4563 |
| ZINC02396923 | -42.6186 |
| ZINC02396923 | -45.0862 |
| ZINC02397450 | -39.3667 |
| ZINC02397587 | -37.6629 |
| ZINC02397787 | -30.3682 |

|              |          |
|--------------|----------|
| ZINC02408820 | -36.6091 |
| ZINC02408820 | -38.2566 |
| ZINC02411850 | -33.3973 |
| ZINC02425726 | -40.3292 |
| ZINC02433746 | -28.2021 |
| ZINC02435635 | -33.5903 |
| ZINC02435637 | -30.7117 |
| ZINC02438523 | -35.8706 |
| ZINC02452225 | -22.1307 |
| ZINC02452914 | -41.7203 |
| ZINC02454596 | -40.0576 |
| ZINC02463309 | -31.5979 |
| ZINC02464582 | -36.1995 |
| ZINC02466542 | -26.1315 |
| ZINC02466563 | -30.5495 |
| ZINC02467739 | -30.2098 |
| ZINC02468580 | -25.7831 |
| ZINC02473958 | -28.6277 |
| ZINC02480065 | -18.1431 |
| ZINC02481755 | -29.749  |
| ZINC02483136 | -44.306  |
| ZINC02484245 | -30.0507 |
| ZINC02489976 | -33.5268 |
| ZINC02500793 | -28.116  |
| ZINC02502660 | -43.6759 |
| ZINC02508142 | -29.3088 |
| ZINC02508142 | -29.3504 |
| ZINC02508486 | -36.2232 |
| ZINC02521384 | -41.1782 |
| ZINC02526853 | -31.6011 |
| ZINC02531058 | -44.1917 |
| ZINC02538021 | -40.6942 |
| ZINC02546429 | -37.7058 |
| ZINC02548243 | -34.3717 |
| ZINC02557861 | -35.0614 |
| ZINC02566482 | -29.5487 |
| ZINC02570906 | -40.2383 |
| ZINC02570996 | -38.2588 |
| ZINC02576670 | -36.3144 |
| ZINC02581863 | -44.9899 |
| ZINC02586221 | -37.5593 |
| ZINC02593941 | -32.8996 |
| ZINC02601181 | -30.4705 |
| ZINC02622181 | -30.9212 |

|              |          |
|--------------|----------|
| ZINC02626384 | -40.9277 |
| ZINC02628378 | -47.1477 |
| ZINC02640191 | -39.0609 |
| ZINC02640191 | -47.8131 |
| ZINC02642567 | -28.8234 |
| ZINC02643050 | -36.9074 |
| ZINC02659969 | -30.7154 |
| ZINC02666969 | -29.8867 |
| ZINC02686400 | -30.9287 |
| ZINC02704300 | -44.6901 |
| ZINC02709006 | -36.8778 |
| ZINC02709261 | -43.7505 |
| ZINC02719228 | -24.355  |
| ZINC02719228 | -30.6888 |
| ZINC02719228 | -34.693  |
| ZINC02730637 | -34.5403 |
| ZINC02737465 | -47.1811 |
| ZINC02738003 | -50.0889 |
| ZINC02741107 | -37.9948 |
| ZINC02743243 | -33.4789 |
| ZINC02744481 | -34.4331 |
| ZINC02756010 | -46.8932 |
| ZINC02757031 | -27.481  |
| ZINC02758681 | -39.5898 |
| ZINC02764583 | -37.3162 |
| ZINC02765009 | -35.6754 |
| ZINC02766640 | -40.2725 |
| ZINC02770132 | -30.0045 |
| ZINC02776171 | -34.675  |
| ZINC02777816 | -42.2229 |
| ZINC02778159 | -37.3135 |
| ZINC02778238 | -49.9379 |
| ZINC02779190 | -46.734  |
| ZINC02787929 | -33.9888 |
| ZINC02792807 | -39.9369 |
| ZINC02794471 | -34.0288 |
| ZINC02794714 | -48.6833 |
| ZINC02795372 | -51.0022 |
| ZINC02797945 | -49.1329 |
| ZINC02828199 | -44.7387 |
| ZINC02837885 | -45.7516 |
| ZINC02850194 | -43.0889 |
| ZINC02852285 | -43.8027 |
| ZINC02852644 | -41.6636 |



|              |          |
|--------------|----------|
| ZINC02852717 | -46.2954 |
| ZINC02866608 | -36.6965 |
| ZINC02872565 | -39.6074 |
| ZINC02872692 | -44.1321 |
| ZINC02873928 | -39.6117 |
| ZINC02874606 | -41.1987 |
| ZINC02877558 | -44.848  |
| ZINC02879092 | -35.4923 |
| ZINC02879092 | -36.9593 |
| ZINC02881736 | -43.1448 |
| ZINC02884938 | -44.7654 |
| ZINC02890322 | -33.6488 |
| ZINC02891894 | -31.9137 |
| ZINC02892927 | -45.244  |
| ZINC02902659 | -36.0776 |
| ZINC02911491 | -38.8843 |
| ZINC02911507 | -34.1342 |
| ZINC02913128 | -38.582  |
| ZINC02914549 | -34.9465 |
| ZINC02916227 | -41.0386 |
| ZINC02919744 | -25.0058 |
| ZINC02919744 | -38.0576 |
| ZINC02925795 | -39.4281 |
| ZINC02927333 | -37.8737 |
| ZINC02932968 | -39.3724 |
| ZINC02934416 | -50.5322 |
| ZINC02944456 | -23.2142 |
| ZINC02947983 | -33.3209 |
| ZINC02953586 | -53.3448 |
| ZINC02975992 | -44.3751 |
| ZINC02975992 | -50.546  |
| ZINC02979681 | -31.9606 |
| ZINC02981439 | -34.4627 |
| ZINC02982588 | -38.5786 |
| ZINC02990268 | -39.0685 |
| ZINC02991174 | -33.0575 |
| ZINC02999792 | -34.3286 |
| ZINC03006242 | -38.2799 |
| ZINC03016867 | -46.1132 |
| ZINC03027636 | -34.4489 |
| ZINC03029348 | -36.4098 |
| ZINC03029622 | -36.5286 |
| ZINC03043685 | -40.7025 |
| ZINC03043685 | -42.3913 |

|              |          |
|--------------|----------|
| ZINC03068044 | -44.1698 |
| ZINC03068439 | -31.8477 |
| ZINC03070627 | -38.2877 |
| ZINC03073046 | -44.4027 |
| ZINC03084551 | -48.5244 |
| ZINC03089798 | -40.9383 |
| ZINC03091632 | -36.0753 |
| ZINC03096165 | -36.7556 |
| ZINC03121363 | -41.4408 |
| ZINC03121962 | -42.2202 |
| ZINC03122928 | -35.0258 |
| ZINC03130674 | -33.4405 |
| ZINC03133618 | -35.4311 |
| ZINC03135219 | -43.123  |
| ZINC03137939 | -38.2893 |
| ZINC03142788 | -36.9501 |
| ZINC03149500 | -33.092  |
| ZINC03150035 | -39.4907 |
| ZINC03150693 | -42.821  |
| ZINC03154282 | -44.0038 |
| ZINC03159303 | -36.4056 |
| ZINC03162857 | -30.5144 |
| ZINC03164422 | -24.4076 |
| ZINC03164895 | -32.5512 |
| ZINC03165579 | -25.4828 |
| ZINC03166258 | -36.3148 |
| ZINC03167350 | -40.2438 |
| ZINC03171111 | -33.9871 |
| ZINC03174999 | -38.3729 |
| ZINC03180170 | -28.7372 |
| ZINC03181301 | -45.4808 |
| ZINC03194801 | -42.2486 |
| ZINC03195576 | -31.5847 |
| ZINC03223720 | -33.3761 |
| ZINC03228758 | -37.4885 |
| ZINC03231992 | -53.928  |
| ZINC03238881 | -28.3198 |
| ZINC03241872 | -43.9622 |
| ZINC03242427 | -28.4667 |
| ZINC03244254 | -36.8236 |
| ZINC03248143 | -52.6777 |
| ZINC03272159 | -46.3648 |
| ZINC03275258 | -35.0471 |
| ZINC03276236 | -40.5524 |

|              |          |
|--------------|----------|
| ZINC03277836 | -42.1514 |
| ZINC03279981 | -38.5082 |
| ZINC03302300 | -39.1283 |
| ZINC03316045 | -32.473  |
| ZINC03317807 | -49.2672 |
| ZINC03321151 | -40.8559 |
| ZINC03331148 | -35.6577 |
| ZINC03331531 | -43.0196 |
| ZINC03333382 | -36.6294 |
| ZINC03334345 | -37.6427 |
| ZINC03343796 | -40.4337 |
| ZINC03347441 | -36.4462 |
| ZINC03353371 | -35.4187 |
| ZINC03355366 | -52.6036 |
| ZINC03359723 | -42.1046 |
| ZINC03369303 | -29.9451 |
| ZINC03374104 | -44.7863 |
| ZINC03394045 | -33.343  |
| ZINC03403087 | -44.493  |
| ZINC03415425 | -33.9113 |
| ZINC03431000 | -33.3763 |
| ZINC03461890 | -39.4258 |
| ZINC03463450 | -42.5287 |
| ZINC03464164 | -41.0974 |
| ZINC03465787 | -36.6708 |
| ZINC03478785 | -44.1616 |
| ZINC03479820 | -34.6917 |
| ZINC03503941 | -37.1741 |
| ZINC03505140 | -46.0297 |
| ZINC03533907 | -26.9022 |
| ZINC03542416 | -39.543  |
| ZINC03545203 | -38.9927 |
| ZINC03549235 | -44.867  |
| ZINC03549890 | -43.1781 |
| ZINC03555319 | -34.5548 |
| ZINC03562880 | -38.3561 |
| ZINC03566573 | -36.6396 |
| ZINC03570269 | -42.5557 |
| ZINC03570269 | -47.0004 |
| ZINC03572565 | -42.6312 |
| ZINC03591042 | -45.0667 |
| ZINC03617143 | -45.9591 |
| ZINC03621486 | -49.5382 |
| ZINC03622749 | -31.574  |

|              |          |
|--------------|----------|
| ZINC03631503 | -31.5022 |
| ZINC03636421 | -32.7175 |
| ZINC03646523 | -24.5727 |
| ZINC03671727 | -44.5602 |
| ZINC03682860 | -31.7494 |
| ZINC03732371 | -27.0784 |
| ZINC03831238 | -33.6065 |
| ZINC03832937 | -38.8447 |
| ZINC03833057 | -38.3421 |
| ZINC03838956 | -52.8316 |
| ZINC03841443 | -34.2923 |
| ZINC03841476 | -33.3616 |
| ZINC03845553 | -32.4044 |
| ZINC03847171 | -31.6474 |
| ZINC03849107 | -44.9106 |
| ZINC03849349 | -32.9318 |
| ZINC03850851 | -36.1545 |
| ZINC03850973 | -32.176  |
| ZINC03868856 | -40.4625 |
| ZINC03871859 | -35.9427 |
| ZINC03873990 | -32.9827 |
| ZINC03875357 | -28.3486 |
| ZINC03883856 | -34.2297 |
| ZINC03884039 | -37.4126 |
| ZINC03886166 | -32.9869 |
| ZINC03888342 | -43.3758 |
| ZINC03888385 | -42.2457 |
| ZINC03888456 | -31.2818 |
| ZINC03896836 | -43.1524 |
| ZINC03896836 | -44.2764 |
| ZINC03897280 | -40.2935 |
| ZINC03898289 | -42.6051 |
| ZINC03902923 | -47.9812 |
| ZINC03906266 | -40.0766 |
| ZINC03911119 | -49.8407 |
| ZINC03911126 | -44.6428 |
| ZINC03911159 | -36.6936 |
| ZINC03911947 | -44.8958 |
| ZINC03912733 | -36.707  |
| ZINC03912733 | -39.0031 |
| ZINC03913813 | -46.292  |
| ZINC03977921 | -34.1154 |
| ZINC03978192 | -24.8409 |
| ZINC03978455 | -39.5222 |

|              |          |
|--------------|----------|
| ZINC03996385 | -41.2007 |
| ZINC03998673 | -37.2705 |
| ZINC03999935 | -38.7738 |
| ZINC04000434 | -37.9085 |
| ZINC04012523 | -29.3648 |
| ZINC04013628 | -35.6868 |
| ZINC04015200 | -45.3991 |
| ZINC04015976 | -36.8749 |
| ZINC04027458 | -25      |
| ZINC04043390 | -29.9518 |
| ZINC04046438 | -44.0475 |
| ZINC04054419 | -37.2644 |
| ZINC04058221 | -41.7507 |
| ZINC04064583 | -38.2403 |
| ZINC04065461 | -44.8288 |
| ZINC04073346 | -40.9508 |
| ZINC04078438 | -34.0859 |
| ZINC04078832 | -41.5805 |
| ZINC04081854 | -27.4993 |
| ZINC04082387 | -23.989  |
| ZINC04086411 | -43.5874 |
| ZINC04094466 | -35.3464 |
| ZINC04095269 | -39.1802 |
| ZINC04095269 | -48.3775 |
| ZINC04095358 | -41.5289 |
| ZINC04095388 | -31.6131 |
| ZINC04095388 | -38.6323 |
| ZINC04099272 | -34.3928 |
| ZINC04107063 | -36.0916 |
| ZINC04120200 | -41.7629 |
| ZINC04122361 | -39.7418 |
| ZINC04123021 | -43.6617 |
| ZINC04125019 | -42.4257 |
| ZINC04125028 | -41.033  |
| ZINC04125112 | -26.3567 |
| ZINC04127211 | -24.3769 |
| ZINC04139963 | -26.6307 |
| ZINC04146940 | -24.1102 |
| ZINC04151414 | -28.0725 |
| ZINC04154660 | -24.0355 |
| ZINC04154660 | -26.9129 |
| ZINC04157288 | -42.561  |
| ZINC04158516 | -47.2939 |
| ZINC04159037 | -37.0903 |

|              |          |
|--------------|----------|
| ZINC04159133 | -48.592  |
| ZINC04165282 | -26.5952 |
| ZINC04167418 | -42.0044 |
| ZINC04167418 | -43.4154 |
| ZINC04169875 | -41.4516 |
| ZINC04172026 | -28.0765 |
| ZINC04172270 | -30.3415 |
| ZINC04173468 | -27.6225 |
| ZINC04183962 | -40.9359 |
| ZINC04184281 | -28.2194 |
| ZINC04188721 | -41.6877 |
| ZINC04192772 | -32.6235 |
| ZINC04200428 | -36.9321 |
| ZINC04201777 | -36.0842 |
| ZINC04206375 | -36.2137 |
| ZINC04206661 | -41.3287 |
| ZINC04206968 | -41.8979 |
| ZINC04207823 | -32.0824 |
| ZINC04215173 | -41.9186 |
| ZINC04216775 | -34.4418 |
| ZINC04218683 | -34.7994 |
| ZINC04228036 | -24.2998 |
| ZINC04233563 | -40.0678 |
| ZINC04233940 | -40.5996 |
| ZINC04236184 | -36.3885 |
| ZINC04237659 | -37.6122 |
| ZINC04249555 | -42.1094 |
| ZINC04253138 | -33.6065 |
| ZINC04255654 | -25.401  |
| ZINC04258186 | -45.411  |
| ZINC04263107 | -42.3109 |
| ZINC04263965 | -43.174  |
| ZINC04264755 | -36.1248 |
| ZINC04267587 | -28.7484 |
| ZINC04269055 | -52.2582 |
| ZINC04278160 | -41.4671 |
| ZINC04281003 | -40.7582 |
| ZINC04284509 | -44.8589 |
| ZINC04290573 | -26.8025 |
| ZINC04299525 | -47.7025 |
| ZINC04306182 | -39.6465 |
| ZINC04311027 | -32.8736 |
| ZINC04312120 | -38.6502 |
| ZINC04315865 | -29.7387 |

|              |          |
|--------------|----------|
| ZINC04316286 | -29.0576 |
| ZINC04322967 | -39.2686 |
| ZINC04323948 | -45.4156 |
| ZINC04325218 | -42.1165 |
| ZINC04326730 | -45.3075 |
| ZINC04327837 | -50.1564 |
| ZINC04327985 | -17.266  |
| ZINC04327985 | -25.684  |
| ZINC04333136 | -40.0381 |
| ZINC04334957 | -32.7992 |
| ZINC04339583 | -36.4348 |
| ZINC04343684 | -43.0357 |
| ZINC04344411 | -36.6732 |
| ZINC04347724 | -40.2361 |
| ZINC04347724 | -45.317  |
| ZINC04347962 | -42.2816 |
| ZINC04352517 | -40.1003 |
| ZINC04352629 | -42.8068 |
| ZINC04356863 | -50.0724 |
| ZINC04358144 | -38.3245 |
| ZINC04358210 | -40.3471 |
| ZINC04359708 | -34.9695 |
| ZINC04359708 | -35.2111 |
| ZINC04359708 | -41.8275 |
| ZINC04359708 | -42.2553 |
| ZINC04361514 | -26.0906 |
| ZINC04370879 | -42.7291 |
| ZINC04373750 | -42.0843 |
| ZINC04387389 | -26.2177 |
| ZINC04412609 | -36.1838 |
| ZINC04414653 | -30.9675 |
| ZINC04416656 | -41.7941 |
| ZINC04438680 | -35.7574 |
| ZINC04450963 | -39.0597 |
| ZINC04473365 | -33.7361 |
| ZINC04474253 | -27.7595 |
| ZINC04477286 | -36.8499 |
| ZINC04477797 | -44.9909 |
| ZINC04477967 | -39.9595 |
| ZINC04481396 | -40.1157 |
| ZINC04482076 | -44.3733 |
| ZINC04483717 | -41.9405 |
| ZINC04483717 | -46.8095 |
| ZINC04484093 | -52.9342 |

|              |          |
|--------------|----------|
| ZINC04487917 | -45.6892 |
| ZINC04488739 | -40.1799 |
| ZINC04494355 | -29.2066 |
| ZINC04494355 | -34.1072 |
| ZINC04494355 | -38.8636 |
| ZINC04496193 | -37.5475 |
| ZINC04496246 | -43.8281 |
| ZINC04501626 | -44.1934 |
| ZINC04501626 | -48.5204 |
| ZINC04503538 | -50.8796 |
| ZINC04508190 | -44.3525 |
| ZINC04510682 | -36.9752 |
| ZINC04510928 | -43.034  |
| ZINC04511168 | -36.0135 |
| ZINC04514024 | -42.7061 |
| ZINC04514315 | -45.4003 |
| ZINC04517837 | -48.2696 |
| ZINC04521614 | -29.0108 |
| ZINC04524557 | -43.8166 |
| ZINC04525648 | -40.1976 |
| ZINC04525648 | -42.8197 |
| ZINC04530683 | -22.3098 |
| ZINC04535157 | -32.0296 |
| ZINC04536174 | -37.4631 |
| ZINC04545174 | -39.37   |
| ZINC04547584 | -35.0871 |
| ZINC04552476 | -24.0871 |
| ZINC04552476 | -33.0293 |
| ZINC04577745 | -24.0471 |
| ZINC04578168 | -34.7158 |
| ZINC04580283 | -36.0456 |
| ZINC04589224 | -38.8544 |
| ZINC04589458 | -40.9218 |
| ZINC04590114 | -38.7933 |
| ZINC04592485 | -20.9797 |
| ZINC04596620 | -37.9816 |
| ZINC04611339 | -40.1948 |
| ZINC04614669 | -37.3435 |
| ZINC04614774 | -44.4704 |
| ZINC04618978 | -32.5619 |
| ZINC04632383 | -39.5896 |
| ZINC04638321 | -22.3962 |
| ZINC04638321 | -26.1683 |
| ZINC04644238 | -30.6459 |



|              |          |
|--------------|----------|
| ZINC04653509 | -24.9514 |
| ZINC04656222 | -39.4731 |
| ZINC04660973 | -34.1529 |
| ZINC04660973 | -39.9231 |
| ZINC04663296 | -37.184  |
| ZINC04672720 | -47.1216 |
| ZINC04672852 | -41.9338 |
| ZINC04678865 | -37.6161 |
| ZINC04678865 | -38.9225 |
| ZINC04680387 | -38.6535 |
| ZINC04682193 | -37.5779 |
| ZINC04684539 | -38.0339 |
| ZINC04685232 | -47.7564 |
| ZINC04686011 | -37.7754 |
| ZINC04689777 | -45.3859 |
| ZINC04690232 | -43.9481 |
| ZINC04694373 | -30.7791 |
| ZINC04695198 | -37.3532 |
| ZINC04696878 | -44.4598 |
| ZINC04697168 | -40.5228 |
| ZINC04697169 | -28.3529 |
| ZINC04698907 | -38.7125 |
| ZINC04701476 | -44.5474 |
| ZINC04702170 | -27.5659 |
| ZINC04703545 | -53.8526 |
| ZINC04704085 | -40.7095 |
| ZINC04705336 | -32.1872 |
| ZINC04705336 | -40.0841 |
| ZINC04705352 | -45.0435 |
| ZINC04711834 | -33.0556 |
| ZINC04712513 | -45.2357 |
| ZINC04713069 | -32.6624 |
| ZINC04715522 | -35.954  |
| ZINC04715794 | -32.5575 |
| ZINC04716141 | -27.9083 |
| ZINC04716141 | -33.8446 |
| ZINC04716141 | -35.9023 |
| ZINC04718298 | -37.6332 |
| ZINC04721515 | -35.3803 |
| ZINC04724645 | -37.8585 |
| ZINC04725627 | -33.4815 |
| ZINC04725997 | -34.6862 |
| ZINC04725997 | -35.4483 |
| ZINC04725997 | -36.3263 |

|              |          |
|--------------|----------|
| ZINC04730757 | -28.8717 |
| ZINC04730757 | -30.3089 |
| ZINC04733854 | -45.0031 |
| ZINC04737962 | -46.0313 |
| ZINC04737985 | -32.6541 |
| ZINC04738055 | -41.2757 |
| ZINC04738596 | -46.2612 |
| ZINC04738718 | -49.367  |
| ZINC04740055 | -45.68   |
| ZINC04742909 | -26.0487 |
| ZINC04743947 | -51.0517 |
| ZINC04744362 | -45.8105 |
| ZINC04746156 | -35.3858 |
| ZINC04751307 | -32.4729 |
| ZINC04762525 | -42.437  |
| ZINC04764709 | -32.7108 |
| ZINC04767607 | -27.4885 |
| ZINC04770238 | -47.3541 |
| ZINC04775566 | -34.2651 |
| ZINC04776233 | -34.7239 |
| ZINC04785237 | -37.1908 |
| ZINC04785237 | -46.6428 |
| ZINC04785485 | -43.5068 |
| ZINC04785529 | -36.8308 |
| ZINC04789853 | -35.3567 |
| ZINC04794500 | -30.7759 |
| ZINC04800835 | -38.0342 |
| ZINC04802945 | -22.784  |
| ZINC04803160 | -21.8608 |
| ZINC04803160 | -32.0051 |
| ZINC04804124 | -46.7986 |
| ZINC04804475 | -39.1655 |
| ZINC04808940 | -32.9577 |
| ZINC04809784 | -26.375  |
| ZINC04809784 | -28.2418 |
| ZINC04810489 | -34.3451 |
| ZINC04813539 | -31.1873 |
| ZINC04821557 | -32.6824 |
| ZINC04829831 | -45.8628 |
| ZINC04829848 | -27.5942 |
| ZINC04842307 | -40.3119 |
| ZINC04843384 | -30.4782 |
| ZINC04843980 | -44.0935 |
| ZINC04844466 | -38.6836 |

|              |          |
|--------------|----------|
| ZINC04844469 | -40.3412 |
| ZINC04845138 | -45.0095 |
| ZINC04853551 | -38.678  |
| ZINC04854871 | -33.1091 |
| ZINC04858002 | -37.9667 |
| ZINC04859723 | -45.0612 |
| ZINC04860659 | -37.6066 |
| ZINC04863489 | -38.543  |
| ZINC04866569 | -40.7713 |
| ZINC04868875 | -26.1963 |
| ZINC04871619 | -30.0235 |
| ZINC04903953 | -39.5499 |
| ZINC04904461 | -45.8208 |
| ZINC04915070 | -33.4377 |
| ZINC04915539 | -25.294  |
| ZINC04915653 | -27.7038 |
| ZINC04919668 | -39.948  |
| ZINC04923428 | -33.2242 |
| ZINC04933949 | -35.0845 |
| ZINC04934708 | -42.8655 |
| ZINC04939046 | -41.4873 |
| ZINC04940096 | -37.9816 |
| ZINC04940142 | -38.4837 |
| ZINC04942222 | -39.9599 |
| ZINC04942964 | -37.7662 |
| ZINC04948267 | -25.7111 |
| ZINC04949359 | -54.1262 |
| ZINC04952451 | -37.8595 |
| ZINC04955818 | -43.7011 |
| ZINC04957346 | -38.4107 |
| ZINC04963818 | -35.8784 |
| ZINC04964557 | -48.3676 |
| ZINC04965030 | -40.8243 |
| ZINC04968335 | -31.542  |
| ZINC04968378 | -21.4681 |
| ZINC04969787 | -31.2504 |
| ZINC04970618 | -37.9947 |
| ZINC04973596 | -29.7661 |
| ZINC04975191 | -33.6909 |
| ZINC04977437 | -36.8981 |
| ZINC04977475 | -38.0811 |
| ZINC04978238 | -40.0879 |
| ZINC04979559 | -39.0301 |
| ZINC04980897 | -36.7661 |

|              |          |
|--------------|----------|
| ZINC04981109 | -36.2838 |
| ZINC04981166 | -49.3793 |
| ZINC04988818 | -32.0727 |
| ZINC04989077 | -35.6985 |
| ZINC04991802 | -41.0582 |
| ZINC04994896 | -44.1605 |
| ZINC04996175 | -30.8837 |
| ZINC04997631 | -36.0422 |
| ZINC04998309 | -42.7194 |
| ZINC05000337 | -39.3217 |
| ZINC05002246 | -34.0716 |
| ZINC05006086 | -24.3627 |
| ZINC05008572 | -39.299  |
| ZINC05020364 | -34.2114 |
| ZINC05020364 | -34.3017 |
| ZINC05022388 | -42.6666 |
| ZINC05027038 | -35.2384 |
| ZINC05027740 | -33.0545 |
| ZINC05030904 | -28.034  |
| ZINC05034722 | -40.4255 |
| ZINC05041012 | -38.5733 |
| ZINC05042498 | -32.9303 |
| ZINC05042697 | -38.9711 |
| ZINC05045705 | -40.587  |
| ZINC05047091 | -36.5956 |
| ZINC05055814 | -38.6339 |
| ZINC05055969 | -31.4474 |
| ZINC05061377 | -46.6925 |
| ZINC05070527 | -40.768  |
| ZINC05078230 | -38.0136 |
| ZINC05080674 | -37.3661 |
| ZINC05080702 | -36.1254 |
| ZINC05091909 | -37.427  |
| ZINC05095408 | -29.2987 |
| ZINC05100648 | -40.4488 |
| ZINC05111498 | -35.8392 |
| ZINC05122686 | -46.1021 |
| ZINC05123364 | -54.1358 |
| ZINC05123931 | -48.2896 |
| ZINC05125267 | -38.0858 |
| ZINC05127139 | -38.2238 |
| ZINC05129356 | -31.0997 |
| ZINC05130240 | -22.2624 |
| ZINC05142013 | -35.2656 |

|              |          |
|--------------|----------|
| ZINC05144838 | -43.1012 |
| ZINC05154524 | -43.4886 |
| ZINC05156269 | -39.2125 |
| ZINC05156415 | -30.2279 |
| ZINC05167702 | -48.976  |
| ZINC05171886 | -38.768  |
| ZINC05174773 | -39.799  |
| ZINC05179313 | -45.9478 |
| ZINC05179700 | -38.1068 |
| ZINC05186322 | -36.8928 |
| ZINC05189661 | -50.2552 |
| ZINC05190429 | -31.2552 |
| ZINC05191348 | -37.8044 |
| ZINC05192841 | -33.6847 |
| ZINC05198010 | -34.8888 |
| ZINC05199418 | -34.9084 |
| ZINC05199849 | -27.1463 |
| ZINC05199849 | -27.7103 |
| ZINC05203636 | -33.3352 |
| ZINC05211401 | -33.1117 |
| ZINC05211711 | -34.2233 |
| ZINC05211910 | -32.4956 |
| ZINC05222921 | -41.9381 |
| ZINC05225154 | -38.4982 |
| ZINC05225298 | -38.9277 |
| ZINC05226853 | -40.3544 |
| ZINC05234221 | -41.199  |
| ZINC05237849 | -41.8775 |
| ZINC05237849 | -48.4493 |
| ZINC05240605 | -28.3929 |
| ZINC05240897 | -34.5045 |
| ZINC05241436 | -50.7744 |
| ZINC05245435 | -39.0647 |
| ZINC05248309 | -34.5722 |
| ZINC05248613 | -31.3331 |
| ZINC05253025 | -36.1277 |
| ZINC05269850 | -35.0422 |
| ZINC05276520 | -33.6979 |
| ZINC05279547 | -37.4587 |
| ZINC05283078 | -32.616  |
| ZINC05284997 | -33.5269 |
| ZINC05286113 | -25.9406 |
| ZINC05289406 | -34.9263 |
| ZINC05291760 | -41.7978 |

|              |          |
|--------------|----------|
| ZINC05293471 | -39.7492 |
| ZINC05293471 | -41.3794 |
| ZINC05296809 | -37.5819 |
| ZINC05296809 | -41.5527 |
| ZINC05299341 | -44.1356 |
| ZINC05306721 | -32.3395 |
| ZINC05318087 | -29.5949 |
| ZINC05319204 | -35.4846 |
| ZINC05337536 | -42.005  |
| ZINC05338054 | -32.7411 |
| ZINC05343181 | -26.1879 |
| ZINC05347537 | -37.1612 |
| ZINC05351546 | -26.9495 |
| ZINC05351546 | -27.676  |
| ZINC05351791 | -30.9951 |
| ZINC05359394 | -37.0249 |
| ZINC05371069 | -40.5827 |
| ZINC05371213 | -36.3168 |
| ZINC05371590 | -31.9231 |
| ZINC05371988 | -44.9546 |
| ZINC05376664 | -42.3226 |
| ZINC05377128 | -33.2756 |
| ZINC05377635 | -38.897  |
| ZINC05380861 | -39.8582 |
| ZINC05380874 | -35.3469 |
| ZINC05382686 | -29.5501 |
| ZINC05382784 | -30.4959 |
| ZINC05382784 | -34.574  |
| ZINC05382784 | -37.1876 |
| ZINC05385438 | -27.9891 |
| ZINC05385438 | -27.9891 |
| ZINC05385438 | -35.1183 |
| ZINC05387413 | -32.6732 |
| ZINC05390969 | -35.2981 |
| ZINC05396121 | -46.8614 |
| ZINC05396214 | -39.6756 |
| ZINC05397191 | -40.0829 |
| ZINC05399887 | -37.3254 |
| ZINC05399887 | -37.4114 |
| ZINC05401434 | -35.5876 |
| ZINC05408551 | -47.3383 |
| ZINC05408751 | -33.1712 |
| ZINC05415320 | -34.8934 |
| ZINC05417151 | -28.6788 |

|              |          |
|--------------|----------|
| ZINC05421045 | -37.4567 |
| ZINC05427175 | -38.3415 |
| ZINC05428676 | -39.0146 |
| ZINC05438219 | -32.74   |
| ZINC05440811 | -34.6751 |
| ZINC05445456 | -23.6529 |
| ZINC05445499 | -32.1378 |
| ZINC05445499 | -45.2002 |
| ZINC05446127 | -37.7757 |
| ZINC05461161 | -38.7016 |
| ZINC05461161 | -42.036  |
| ZINC05461939 | -35.0757 |
| ZINC05470890 | -35.1311 |
| ZINC05477995 | -30.3805 |
| ZINC05478153 | -46.4111 |
| ZINC05478326 | -40.7196 |
| ZINC05484000 | -31.0709 |
| ZINC05484000 | -31.4423 |
| ZINC05490062 | -32.4882 |
| ZINC05490442 | -26.8014 |
| ZINC05490664 | -31.1258 |
| ZINC05499876 | -41.4291 |
| ZINC05503790 | -40.6567 |
| ZINC05504034 | -36.2946 |
| ZINC05504034 | -45.1373 |
| ZINC05506138 | -44.7179 |
| ZINC05514932 | -42.6264 |
| ZINC05515886 | -38.6732 |
| ZINC05516049 | -32.1767 |
| ZINC05516502 | -30.1789 |
| ZINC05517465 | -37.9366 |
| ZINC05521512 | -29.3107 |
| ZINC05526054 | -34.6856 |
| ZINC05527019 | -34.5367 |
| ZINC05527827 | -34.7498 |
| ZINC05541837 | -28.5228 |
| ZINC05545465 | -42.4453 |
| ZINC05545465 | -42.9688 |
| ZINC05545465 | -50.8767 |
| ZINC05546124 | -30.6551 |
| ZINC05550596 | -32.9436 |
| ZINC05557925 | -36.2126 |
| ZINC05559597 | -39.4631 |
| ZINC05576333 | -48.0607 |

|              |          |
|--------------|----------|
| ZINC05578071 | -42.1272 |
| ZINC05578133 | -43.4769 |
| ZINC05578619 | -31.2724 |
| ZINC05583092 | -27.861  |
| ZINC05584552 | -36.0866 |
| ZINC05589896 | -31.4428 |
| ZINC05595918 | -31.4155 |
| ZINC05595918 | -35.7588 |
| ZINC05596041 | -29.0964 |
| ZINC05596041 | -35.6242 |
| ZINC05600304 | -40.3631 |
| ZINC05602880 | -46.9648 |
| ZINC05603204 | -40.896  |
| ZINC05604306 | -31.5221 |
| ZINC05604609 | -34.7055 |
| ZINC05604711 | -33.3659 |
| ZINC05613949 | -30.3701 |
| ZINC05619944 | -43.5345 |
| ZINC05627055 | -45.7602 |
| ZINC05627353 | -36.6465 |
| ZINC05638430 | -31.5415 |
| ZINC05638430 | -33.5049 |
| ZINC05659858 | -39.1076 |
| ZINC05667451 | -41.9032 |
| ZINC05673158 | -38.3003 |
| ZINC05674952 | -38.6955 |
| ZINC05674981 | -38.8786 |
| ZINC05675129 | -33.537  |
| ZINC05677073 | -31.5328 |
| ZINC05677587 | -37.2945 |
| ZINC05680994 | -33.6294 |
| ZINC05682969 | -49.4502 |
| ZINC05685213 | -36.8521 |
| ZINC05685917 | -37.8946 |
| ZINC05685917 | -44.1193 |
| ZINC05687130 | -37.8312 |
| ZINC05699437 | -39.4057 |
| ZINC05703390 | -45.9866 |
| ZINC05717325 | -43.4536 |
| ZINC05729826 | -33.2045 |
| ZINC05734375 | -40.2498 |
| ZINC05739447 | -36.1121 |
| ZINC05739825 | -30.2388 |
| ZINC05740471 | -39.2592 |



|              |          |
|--------------|----------|
| ZINC05741693 | -28.8607 |
| ZINC05753695 | -37.9207 |
| ZINC05767689 | -39.5541 |
| ZINC05769174 | -43.1268 |
| ZINC05769759 | -43.7828 |
| ZINC05776151 | -49.0956 |
| ZINC05781225 | -25.5454 |
| ZINC05785177 | -28.1593 |
| ZINC05793397 | -39.9357 |
| ZINC05793398 | -31.6628 |
| ZINC05793398 | -31.6628 |
| ZINC05793563 | -44.4709 |
| ZINC05798582 | -36.907  |
| ZINC05798723 | -34.9414 |
| ZINC05813261 | -28.0574 |
| ZINC05813261 | -28.1946 |
| ZINC05829297 | -43.3522 |
| ZINC05835383 | -32.2408 |
| ZINC05837030 | -35.749  |
| ZINC05838198 | -37.4134 |
| ZINC05843511 | -45.2092 |
| ZINC05854274 | -30.0822 |
| ZINC05855383 | -31.8323 |
| ZINC05863997 | -35.2741 |
| ZINC05882709 | -30.1745 |
| ZINC05884068 | -28.2057 |
| ZINC05884068 | -32.5395 |
| ZINC05886785 | -40.274  |
| ZINC05887336 | -37.1153 |
| ZINC05895328 | -42.3396 |
| ZINC05898668 | -40.7969 |
| ZINC05899449 | -35.4218 |
| ZINC05906601 | -27.179  |
| ZINC05907983 | -36.2331 |
| ZINC05907983 | -37.4725 |
| ZINC05909089 | -26.1577 |
| ZINC05921232 | -33.8037 |
| ZINC05921568 | -37.0272 |
| ZINC05936369 | -44.8557 |
| ZINC05936493 | -42.1598 |
| ZINC05944258 | -37.95   |
| ZINC05967203 | -31.7677 |
| ZINC05976469 | -25.81   |
| ZINC05997244 | -41.6435 |

|              |          |
|--------------|----------|
| ZINC06005321 | -29.3474 |
| ZINC06005321 | -32.7809 |
| ZINC06024394 | -42.1105 |
| ZINC06024394 | -53.5004 |
| ZINC06048799 | -38.7848 |
| ZINC06051217 | -38.9096 |
| ZINC06059651 | -38.8544 |
| ZINC06059948 | -42.4583 |
| ZINC06066054 | -40.0501 |
| ZINC06073994 | -44.9949 |
| ZINC06085651 | -43.2271 |
| ZINC06090272 | -34.5546 |
| ZINC06143896 | -41.7014 |
| ZINC06154325 | -41.1353 |
| ZINC06158519 | -39.0705 |
| ZINC06159108 | -36.4313 |
| ZINC06176752 | -33.2071 |
| ZINC06181670 | -46.5442 |
| ZINC06183929 | -27.7168 |
| ZINC06187452 | -32.3079 |
| ZINC06187452 | -33.5244 |
| ZINC06188226 | -39.0288 |
| ZINC06191794 | -51.4603 |
| ZINC06195819 | -36.7715 |
| ZINC06195819 | -38.0859 |
| ZINC06211469 | -37.6411 |
| ZINC06214626 | -40.8006 |
| ZINC06221640 | -40.3463 |
| ZINC06222696 | -34.5505 |
| ZINC06228100 | -43.1123 |
| ZINC06229395 | -37.158  |
| ZINC06230618 | -39.8309 |
| ZINC06238547 | -37.2141 |
| ZINC06238829 | -26.8939 |
| ZINC06238829 | -33.7721 |
| ZINC06238829 | -39.2936 |
| ZINC06240019 | -40.8012 |
| ZINC06242377 | -27.9159 |
| ZINC06243401 | -43.4927 |
| ZINC06248799 | -19.3074 |
| ZINC06258350 | -50.708  |
| ZINC06267411 | -29.4404 |
| ZINC06269125 | -50.6044 |
| ZINC06276842 | -37.1159 |

|              |          |
|--------------|----------|
| ZINC06279368 | -35.9019 |
| ZINC06282835 | -43.9442 |
| ZINC06314808 | -39.5099 |
| ZINC06314834 | -32.9889 |
| ZINC06326155 | -46.69   |
| ZINC06328842 | -49.827  |
| ZINC06330558 | -44.084  |
| ZINC06331924 | -41.2055 |
| ZINC06334169 | -42.0575 |
| ZINC06337736 | -44.9274 |
| ZINC06337808 | -28.2671 |
| ZINC06342715 | -38.756  |
| ZINC06381872 | -42.919  |
| ZINC06382439 | -30.1304 |
| ZINC06382439 | -40.4079 |
| ZINC06383110 | -45.9252 |
| ZINC06394406 | -35.1748 |
| ZINC06398751 | -42.5158 |
| ZINC06399836 | -41.9912 |
| ZINC06401508 | -33.1106 |
| ZINC06406697 | -19.9926 |
| ZINC06420371 | -31.8009 |
| ZINC06423978 | -21.8907 |
| ZINC06442596 | -33.6647 |
| ZINC06445610 | -29.3027 |
| ZINC06445610 | -35.7273 |
| ZINC06468091 | -33.4363 |
| ZINC06468091 | -43.7372 |
| ZINC06468200 | -35.9259 |
| ZINC06479984 | -39.4994 |
| ZINC06492639 | -41.2526 |
| ZINC06493767 | -38.0733 |
| ZINC06510554 | -25.2763 |
| ZINC06514147 | -36.0061 |
| ZINC06526976 | -37.3141 |
| ZINC06527999 | -32.9634 |
| ZINC06532382 | -33.0728 |
| ZINC06547195 | -39.1269 |
| ZINC06553818 | -27.8773 |
| ZINC06557394 | -33.8587 |
| ZINC06570064 | -31.274  |
| ZINC06588894 | -40.0287 |
| ZINC06614150 | -38.0099 |
| ZINC06625478 | -40.5066 |

|              |          |
|--------------|----------|
| ZINC06633873 | -40.4278 |
| ZINC06640691 | -38.8781 |
| ZINC06650996 | -35.5407 |
| ZINC06657315 | -38.1216 |
| ZINC06659067 | -43.0772 |
| ZINC06662613 | -37.4405 |
| ZINC06664716 | -36.238  |
| ZINC06667693 | -32.2039 |
| ZINC06668516 | -29.4843 |
| ZINC06668516 | -30.5362 |
| ZINC06679196 | -29.4428 |
| ZINC06682128 | -35.2698 |
| ZINC06684013 | -35.1243 |
| ZINC06700928 | -42.2638 |
| ZINC06714395 | -37.9567 |
| ZINC06720064 | -33.3184 |
| ZINC06720064 | -35.7471 |
| ZINC06724157 | -29.6392 |
| ZINC06729239 | -37.1314 |
| ZINC06731937 | -27.8018 |
| ZINC06733045 | -39.7526 |
| ZINC06736926 | -42.2422 |
| ZINC06737038 | -34.5665 |
| ZINC06737848 | -37.4899 |
| ZINC06744711 | -40.0715 |
| ZINC06748342 | -33.7142 |
| ZINC06748414 | -41.347  |
| ZINC06752718 | -43.3516 |
| ZINC06756478 | -34.29   |
| ZINC06756582 | -39.9336 |
| ZINC06756582 | -41.4372 |
| ZINC06767235 | -31.7685 |
| ZINC06776117 | -40.1853 |
| ZINC06786117 | -29.7586 |
| ZINC06786117 | -31.1027 |
| ZINC06786362 | -33.4342 |
| ZINC06787652 | -27.7489 |
| ZINC06790386 | -46.2416 |
| ZINC06790623 | -38.5151 |
| ZINC06790633 | -45.3231 |
| ZINC06796393 | -39.8744 |
| ZINC06802518 | -34.5436 |
| ZINC06809804 | -30.1298 |
| ZINC06817442 | -37.9976 |

|              |          |
|--------------|----------|
| ZINC06823386 | -35.8828 |
| ZINC06825200 | -39.6435 |
| ZINC06829201 | -34.5616 |
| ZINC06832180 | -34.8079 |
| ZINC06841154 | -39.604  |
| ZINC06842982 | -39.4641 |
| ZINC06849419 | -36.434  |
| ZINC06849547 | -45.3348 |
| ZINC06850625 | -38.3846 |
| ZINC06850784 | -36.6309 |
| ZINC06859652 | -36.9941 |
| ZINC06864593 | -38.2275 |
| ZINC06866687 | -46.9262 |
| ZINC06877634 | -33.5533 |
| ZINC06879783 | -44.5939 |
| ZINC06880126 | -37.5495 |
| ZINC06881386 | -43.1501 |
| ZINC06891670 | -45.3092 |
| ZINC06895305 | -38.9266 |
| ZINC06900928 | -36.7513 |
| ZINC06903318 | -45.8286 |
| ZINC06908366 | -36.5599 |
| ZINC06908366 | -37.6606 |
| ZINC06910866 | -40.5909 |
| ZINC06914810 | -44.4735 |
| ZINC06921321 | -50.0355 |
| ZINC06922229 | -38.7563 |
| ZINC06925357 | -39.6393 |
| ZINC06926820 | -37.4365 |
| ZINC06942632 | -48.9562 |
| ZINC06944093 | -36.3751 |
| ZINC06944574 | -36.9939 |
| ZINC06947616 | -38.3571 |
| ZINC06948589 | -42.1237 |
| ZINC06963959 | -34.9175 |
| ZINC06983015 | -38.8223 |
| ZINC06989522 | -40.0521 |
| ZINC07023291 | -34.7568 |
| ZINC07028165 | -45.345  |
| ZINC07056042 | -44.2709 |
| ZINC07059210 | -32.9454 |
| ZINC07092445 | -46.28   |
| ZINC07124118 | -48.735  |
| ZINC07137559 | -42.1249 |

|              |          |
|--------------|----------|
| ZINC07139201 | -36.5701 |
| ZINC07144115 | -32.8762 |
| ZINC07150049 | -50.3512 |
| ZINC07161667 | -51.2134 |
| ZINC07161960 | -47.1998 |
| ZINC07169020 | -43.428  |
| ZINC07185995 | -39.1759 |
| ZINC07191917 | -37.0882 |
| ZINC07193883 | -39.7933 |
| ZINC07194399 | -37.8897 |
| ZINC07194841 | -43.8752 |
| ZINC07236541 | -45.7877 |
| ZINC07236671 | -44.8886 |
| ZINC07257434 | -36.9962 |
| ZINC07274758 | -35.9237 |
| ZINC07318674 | -46.4366 |
| ZINC07329146 | -38.9989 |
| ZINC07336048 | -45.8021 |
| ZINC07340180 | -33.5441 |
| ZINC07341507 | -32.8227 |
| ZINC07343133 | -46.1505 |
| ZINC07343133 | -49.3092 |
| ZINC07347387 | -48.6191 |
| ZINC07366464 | -44.2485 |
| ZINC07377507 | -29.4897 |
| ZINC07384835 | -33.0931 |
| ZINC07392407 | -37.2549 |
| ZINC07396949 | -41.5707 |
| ZINC07400464 | -44.2499 |
| ZINC07402259 | -40.5201 |
| ZINC07450070 | -37.3745 |
| ZINC07454401 | -22.2093 |
| ZINC07497902 | -37.7008 |
| ZINC07519880 | -34.2869 |
| ZINC07529762 | -32.5196 |
| ZINC07553158 | -33.0218 |
| ZINC07558626 | -29.8589 |
| ZINC07586595 | -46.5722 |
| ZINC07587794 | -40.0498 |
| ZINC07594128 | -33.0508 |
| ZINC07600902 | -42.3033 |
| ZINC07609761 | -39.0061 |
| ZINC07619677 | -31.1778 |
| ZINC07622914 | -36.0444 |

|              |          |
|--------------|----------|
| ZINC07676053 | -42.3856 |
| ZINC07676053 | -43.2873 |
| ZINC07706639 | -37.7033 |
| ZINC07742016 | -40.0595 |
| ZINC07752197 | -35.7728 |
| ZINC07756036 | -37.3504 |
| ZINC07756949 | -36.6971 |
| ZINC07756949 | -42.2671 |
| ZINC07777397 | -40.6471 |
| ZINC07779127 | -41.5643 |
| ZINC07779332 | -44.933  |
| ZINC07779393 | -38.5375 |
| ZINC07779646 | -41.6749 |
| ZINC07784224 | -45.4204 |
| ZINC07786015 | -44.6066 |
| ZINC07787552 | -34.8349 |
| ZINC07805298 | -37.0622 |
| ZINC07811990 | -36.3186 |
| ZINC07814183 | -38.3147 |
| ZINC07852692 | -35.2255 |
| ZINC07882770 | -43.5982 |
| ZINC07883232 | -40.944  |
| ZINC07898964 | -38.3761 |
| ZINC07911637 | -41.5464 |
| ZINC07912003 | -49.8621 |
| ZINC07916480 | -37.8245 |
| ZINC07945623 | -45.9032 |
| ZINC07945623 | -47.9156 |
| ZINC07960656 | -33.5886 |
| ZINC07962000 | -35.7644 |
| ZINC07983583 | -43.0518 |
| ZINC07985852 | -48.5739 |
| ZINC07985897 | -36.3293 |
| ZINC07996520 | -33.0939 |
| ZINC08014302 | -46.1228 |
| ZINC08022333 | -39.1605 |
| ZINC08023504 | -32.8206 |
| ZINC08024689 | -34.1475 |
| ZINC08028282 | -46.8021 |
| ZINC08028490 | -41.9848 |
| ZINC08033983 | -41.1368 |
| ZINC08038421 | -37.6632 |
| ZINC08047054 | -38.8219 |
| ZINC08053558 | -34.961  |

|              |          |
|--------------|----------|
| ZINC08062657 | -45.7918 |
| ZINC08105877 | -48.5263 |
| ZINC08109851 | -34.6363 |
| ZINC08109851 | -46.2825 |
| ZINC08112101 | -33.2429 |
| ZINC08133921 | -34.9636 |
| ZINC08152283 | -46.9083 |
| ZINC08152283 | -49.3017 |
| ZINC08175003 | -46.294  |
| ZINC08179255 | -45.6926 |
| ZINC08184046 | -35.9274 |
| ZINC08184219 | -44.6218 |
| ZINC08186477 | -44.1368 |
| ZINC08186828 | -35.528  |
| ZINC08189832 | -40.6354 |
| ZINC08190336 | -47.9533 |
| ZINC08203469 | -35.0131 |
| ZINC08216759 | -41.0919 |
| ZINC08232632 | -45.9069 |
| ZINC08274767 | -45.0579 |
| ZINC08276946 | -36.3768 |
| ZINC08277010 | -30.2513 |
| ZINC08295748 | -42.9684 |
| ZINC08296263 | -36.6885 |
| ZINC08299650 | -35.1659 |
| ZINC08312530 | -51.738  |
| ZINC08317645 | -39.3869 |
| ZINC08322906 | -47.9216 |
| ZINC08327214 | -44.4668 |
| ZINC08345819 | -40.1026 |
| ZINC08359850 | -32.9635 |
| ZINC08376823 | -43.1494 |
| ZINC08388682 | -33.438  |
| ZINC08389196 | -40.106  |
| ZINC08399763 | -30.8958 |
| ZINC08400213 | -40.7287 |
| ZINC08401993 | -50.8088 |
| ZINC08408522 | -34.7529 |
| ZINC08410168 | -33.0381 |
| ZINC08419573 | -39.4874 |
| ZINC08427796 | -37.2762 |
| ZINC08429437 | -44.0389 |
| ZINC08432294 | -10.6897 |
| ZINC08432294 | -16.6216 |



|              |          |
|--------------|----------|
| ZINC08435970 | -37.0382 |
| ZINC08441023 | -31.4048 |
| ZINC08447348 | -36.9011 |
| ZINC08451220 | -32.6571 |
| ZINC08453225 | -31.1519 |
| ZINC08470446 | -45.6269 |
| ZINC08486625 | -42.5557 |
| ZINC08513603 | -43.7134 |
| ZINC08528836 | -44.2986 |
| ZINC08553319 | -35.5754 |
| ZINC08559217 | -36.2466 |
| ZINC08559237 | -30.762  |
| ZINC08559938 | -39.9225 |
| ZINC08560107 | -36.3635 |
| ZINC08564938 | -47.4184 |
| ZINC08565092 | -46.5178 |
| ZINC08567334 | -39.3561 |
| ZINC08588554 | -25.475  |
| ZINC08589182 | -34.0085 |
| ZINC08595113 | -30.2846 |
| ZINC08600680 | -33.9521 |
| ZINC08611138 | -38.5193 |
| ZINC08615688 | -33.3966 |
| ZINC08617648 | -31.2053 |
| ZINC08620248 | -39.0737 |
| ZINC08648557 | -34.5052 |
| ZINC08656933 | -33.7043 |
| ZINC08671881 | -36.051  |
| ZINC08673311 | -30.7127 |
| ZINC08685246 | -32.5009 |
| ZINC08687450 | -37.4581 |
| ZINC08694977 | -34.8224 |
| ZINC08694977 | -40.7688 |
| ZINC08695098 | -33.8049 |
| ZINC08695098 | -36.0901 |
| ZINC08698080 | -25.6304 |
| ZINC08698254 | -22.9288 |
| ZINC08699106 | -36.022  |
| ZINC08707956 | -40.2406 |
| ZINC08709304 | -34.4335 |
| ZINC08719809 | -44.222  |
| ZINC08726307 | -35.2544 |
| ZINC08729711 | -34.9674 |
| ZINC08739963 | -43.0688 |

|              |          |
|--------------|----------|
| ZINC08740213 | -27.9615 |
| ZINC08742753 | -38.0246 |
| ZINC08742753 | -38.9368 |
| ZINC08742871 | -27.9439 |
| ZINC08746375 | -33.527  |
| ZINC08746375 | -40.2879 |
| ZINC08749564 | -42.3974 |
| ZINC08750066 | -44.8791 |
| ZINC08756346 | -40.1325 |
| ZINC08757032 | -45.4446 |
| ZINC08757145 | -34.3658 |
| ZINC08761877 | -38.008  |
| ZINC08762557 | -43.5825 |
| ZINC08767969 | -42.9977 |
| ZINC08768326 | -32.4128 |
| ZINC08768546 | -33.3913 |
| ZINC08768559 | -36.1766 |
| ZINC08769153 | -32.8936 |
| ZINC08780700 | -41.2387 |
| ZINC08792479 | -41.1562 |
| ZINC08815844 | -39.6032 |
| ZINC08820330 | -48.4789 |
| ZINC08821479 | -57.0859 |
| ZINC08838110 | -44.1346 |
| ZINC08838854 | -44.6849 |
| ZINC08844371 | -29.3852 |
| ZINC08845150 | -29.0431 |
| ZINC08845150 | -36.4649 |
| ZINC08854984 | -36.0569 |
| ZINC08856321 | -27.5417 |
| ZINC08856321 | -28.8347 |
| ZINC08871838 | -33.2013 |
| ZINC08877973 | -41.2491 |
| ZINC08880029 | -40.3159 |
| ZINC08910445 | -29.3106 |
| ZINC08910863 | -43.4657 |
| ZINC08914358 | -40.8938 |
| ZINC08914822 | -40.4693 |
| ZINC08916237 | -32.8242 |
| ZINC08919016 | -28.9628 |
| ZINC08930366 | -36.6306 |
| ZINC08931886 | -31.804  |
| ZINC08934964 | -32.9254 |
| ZINC08935756 | -38.7492 |

|              |          |
|--------------|----------|
| ZINC08943754 | -45.1293 |
| ZINC08970057 | -42.8905 |
| ZINC08970883 | -44.5264 |
| ZINC08972304 | -30.2896 |
| ZINC08972304 | -36.539  |
| ZINC08974420 | -40.6052 |
| ZINC08974420 | -43.1799 |
| ZINC08984747 | -45.7324 |
| ZINC08990848 | -37.162  |
| ZINC08990883 | -21.2286 |
| ZINC08991225 | -52.1047 |
| ZINC08991636 | -46.3303 |
| ZINC08996196 | -19.9039 |
| ZINC08996196 | -20.9625 |
| ZINC08997284 | -34.6631 |
| ZINC08997284 | -45.5372 |
| ZINC09005178 | -34.8518 |
| ZINC09009183 | -26.2972 |
| ZINC09009183 | -28.0633 |
| ZINC09010819 | -43.2965 |
| ZINC09012084 | -32.2732 |
| ZINC09012084 | -35.8123 |
| ZINC09012461 | -36.3968 |
| ZINC09012461 | -40.5684 |
| ZINC09012461 | -44.0952 |
| ZINC09012461 | -45.4825 |
| ZINC09012565 | -36.3992 |
| ZINC09013612 | -20.0031 |
| ZINC09015294 | -26.9677 |
| ZINC09015915 | -33.0981 |
| ZINC09015915 | -37.5214 |
| ZINC09028293 | -36.1847 |
| ZINC09029168 | -40.3091 |
| ZINC09036590 | -43.173  |
| ZINC09036701 | -36.9677 |
| ZINC09036745 | -39.8356 |
| ZINC09041244 | -23.3751 |
| ZINC09042977 | -39.9698 |
| ZINC09046326 | -26.9507 |
| ZINC09046326 | -35.5518 |
| ZINC09049457 | -51.9519 |
| ZINC09054217 | -45.3619 |
| ZINC09058864 | -30.455  |
| ZINC09065577 | -45.8509 |

|              |          |
|--------------|----------|
| ZINC09072859 | -43.8729 |
| ZINC09073141 | -21.1912 |
| ZINC09087695 | -34.8592 |
| ZINC09088112 | -40.1247 |
| ZINC09088112 | -40.2536 |
| ZINC09088112 | -42.9666 |
| ZINC09088176 | -41.8679 |
| ZINC09096139 | -40.5005 |
| ZINC09110304 | -42.4917 |
| ZINC09111441 | -29.0503 |
| ZINC09111476 | -28.4842 |
| ZINC09114959 | -35.8117 |
| ZINC09116777 | -43.5304 |
| ZINC09123632 | -33.1092 |
| ZINC09123737 | -31.1361 |
| ZINC09124849 | -31.5494 |
| ZINC09135657 | -53.1329 |
| ZINC09140511 | -42.0852 |
| ZINC09140721 | -49.1524 |
| ZINC09143660 | -42.8495 |
| ZINC09155131 | -33.4446 |
| ZINC09155513 | -27.2807 |
| ZINC09158213 | -35.5206 |
| ZINC09160334 | -27.4907 |
| ZINC09160589 | -35.3885 |
| ZINC09160589 | -35.6651 |
| ZINC09164739 | -43.0479 |
| ZINC09193048 | -43.3583 |
| ZINC09199145 | -53.9849 |
| ZINC09203130 | -42.0443 |
| ZINC09204740 | -44.8495 |
| ZINC09206464 | -32.5586 |
| ZINC09210753 | -14.2651 |
| ZINC09216004 | -41.341  |
| ZINC09223209 | -32.4586 |
| ZINC09226478 | -34.779  |
| ZINC09227009 | -34.431  |
| ZINC09229406 | -47.6733 |
| ZINC09239670 | -30.5302 |
| ZINC09242308 | -29.6736 |
| ZINC09242389 | -33.3321 |
| ZINC09242546 | -34.2301 |
| ZINC09242546 | -35.4268 |
| ZINC09244267 | -21.4259 |

|              |          |
|--------------|----------|
| ZINC09244267 | -21.7182 |
| ZINC09244789 | -47.3647 |
| ZINC09249771 | -38.8494 |
| ZINC09258956 | -35.5351 |
| ZINC09264510 | -43.3814 |
| ZINC09270813 | -36.9168 |
| ZINC09271129 | -35.2623 |
| ZINC09271129 | -39.2229 |
| ZINC09271978 | -30.0127 |
| ZINC09274626 | -35.9174 |
| ZINC09282603 | -36.5507 |
| ZINC09287111 | -43.3625 |
| ZINC09287725 | -39.0717 |
| ZINC09288337 | -43.7134 |
| ZINC09293255 | -22.8284 |
| ZINC09294313 | -36.4697 |
| ZINC09305250 | -35.9335 |
| ZINC09305907 | -48.7599 |
| ZINC09309136 | -37.6915 |
| ZINC09312377 | -28.2253 |
| ZINC09312377 | -33.5288 |
| ZINC09316992 | -43.8881 |
| ZINC09322167 | -44.9231 |
| ZINC09327424 | -24.3916 |
| ZINC09327424 | -37.1374 |
| ZINC09327424 | -38.261  |
| ZINC09327424 | -39.3381 |
| ZINC09327424 | -39.3914 |
| ZINC09328440 | -31.9217 |
| ZINC09329414 | -44.6393 |
| ZINC09330030 | -24.6747 |
| ZINC09346649 | -46.8184 |
| ZINC09348622 | -38.8423 |
| ZINC09353135 | -31.3998 |
| ZINC09354497 | -22.7608 |
| ZINC09354497 | -34.8672 |
| ZINC09354497 | -48.3601 |
| ZINC09356832 | -34.5502 |
| ZINC09359541 | -39.6734 |
| ZINC09374065 | -34.36   |
| ZINC09374065 | -35.0412 |
| ZINC09374065 | -40.1537 |
| ZINC09374065 | -41.7841 |
| ZINC09374173 | -24.7479 |

|              |          |
|--------------|----------|
| ZINC09374173 | -38.4173 |
| ZINC09378395 | -37.2325 |
| ZINC09378395 | -41.9982 |
| ZINC09378487 | -35.772  |
| ZINC09380496 | -19.6576 |
| ZINC09380496 | -30.6148 |
| ZINC09380496 | -35.4683 |
| ZINC09388073 | -33.1038 |
| ZINC09401902 | -47.0996 |
| ZINC09406226 | -39.489  |
| ZINC09407642 | -26.9648 |
| ZINC09410753 | -27.2464 |
| ZINC09413509 | -29.5294 |
| ZINC09419790 | -36.4768 |
| ZINC09425097 | -38.316  |
| ZINC09434348 | -49.7474 |
| ZINC09434772 | -37.0798 |
| ZINC09437316 | -36.4267 |
| ZINC09437316 | -37.2344 |
| ZINC09439954 | -46.4973 |
| ZINC09441035 | -50.9667 |
| ZINC09447857 | -36.9221 |
| ZINC09461518 | -29.2566 |
| ZINC09461780 | -28.2921 |
| ZINC09461780 | -32.7319 |
| ZINC09461780 | -37.9677 |
| ZINC09463108 | -33.6719 |
| ZINC09463108 | -35.5528 |
| ZINC09464052 | -46.8436 |
| ZINC09467347 | -38.6276 |
| ZINC09470921 | -33.7698 |
| ZINC09478520 | -45.6774 |
| ZINC09481788 | -55.2752 |
| ZINC09485634 | -38.8486 |
| ZINC09486573 | -44.2637 |
| ZINC09490617 | -27.4556 |
| ZINC09492105 | -28.2791 |
| ZINC09497321 | -25.4111 |
| ZINC09497321 | -39.7253 |
| ZINC09498980 | -29.0568 |
| ZINC09512646 | -39.956  |
| ZINC09517094 | -33.3142 |
| ZINC09517571 | -29.617  |
| ZINC09518356 | -46.4429 |

|              |          |
|--------------|----------|
| ZINC09529739 | -29.6796 |
| ZINC09543414 | -37.6665 |
| ZINC09547320 | -38.4299 |
| ZINC09548678 | -43.0496 |
| ZINC09557127 | -26.9055 |
| ZINC09557127 | -30.7296 |
| ZINC09557514 | -23.731  |
| ZINC09557514 | -36.3601 |
| ZINC09581691 | -26.8376 |
| ZINC09586378 | -43.3932 |
| ZINC09589051 | -41.4103 |
| ZINC09601711 | -43.7578 |
| ZINC09602371 | -37.3706 |
| ZINC09621781 | -38.7485 |
| ZINC09631855 | -24.4534 |
| ZINC09634457 | -35.9242 |
| ZINC09634831 | -42.7667 |
| ZINC09641351 | -28.4146 |
| ZINC09641708 | -48.0823 |
| ZINC09666227 | -37.921  |
| ZINC09667246 | -40.7573 |
| ZINC09668916 | -35.6114 |
| ZINC09670117 | -49.3747 |
| ZINC09675194 | -37.1912 |
| ZINC09675194 | -48.7011 |
| ZINC09695503 | -27.404  |
| ZINC09704767 | -48.5305 |
| ZINC09720948 | -49.3859 |
| ZINC09725914 | -34.1785 |
| ZINC09730707 | -28.8242 |
| ZINC09730707 | -30.7591 |
| ZINC09742186 | -40.7034 |
| ZINC09750243 | -42.8    |
| ZINC09821471 | -38.516  |
| ZINC09834431 | -31.9178 |
| ZINC09865824 | -30.1939 |
| ZINC09882785 | -46.6955 |
| ZINC09910325 | -49.6112 |
| ZINC09915762 | -25.5325 |
| ZINC09927385 | -41.8096 |
| ZINC09935109 | -28.3165 |
| ZINC09935109 | -35.4686 |
| ZINC09935319 | -32.2012 |
| ZINC09936449 | -35.4409 |

|              |          |
|--------------|----------|
| ZINC09942102 | -49.9795 |
| ZINC09949283 | -34.2086 |
| ZINC09952931 | -39.886  |
| ZINC09961477 | -26.2651 |
| ZINC09969141 | -40.6698 |
| ZINC09970507 | -27.6505 |
| ZINC09972489 | -28.6226 |
| ZINC10010570 | -44.676  |
| ZINC10012881 | -42.2118 |
| ZINC10015143 | -31.5264 |
| ZINC10025186 | -43.3845 |
| ZINC10028811 | -30.9826 |
| ZINC10033419 | -37.4311 |
| ZINC10046397 | -39.1757 |
| ZINC10075288 | -44.2944 |
| ZINC10084446 | -46.1516 |
| ZINC10109778 | -46.0895 |
| ZINC10128089 | -40.9272 |
| ZINC10142162 | -30.0942 |
| ZINC10149311 | -52.3033 |
| ZINC10156736 | -39.6598 |
| ZINC10157223 | -30.8454 |
| ZINC10157925 | -33.8893 |
| ZINC10203587 | -45.3467 |
| ZINC10214250 | -28.9569 |
| ZINC10214559 | -32.034  |
| ZINC10215526 | -45.7182 |
| ZINC10219721 | -28.5726 |
| ZINC10220677 | -42.4335 |
| ZINC10225145 | -40.0862 |
| ZINC10225145 | -41.8223 |
| ZINC10232576 | -27.5281 |
| ZINC10232576 | -29.5239 |
| ZINC10252931 | -34.6135 |
| ZINC10255312 | -40.4925 |
| ZINC10286781 | -37.0623 |
| ZINC10325267 | -43.4579 |
| ZINC10339295 | -29.6772 |
| ZINC10339374 | -41.4753 |
| ZINC10431761 | -31.6376 |
| ZINC10463105 | -46.5683 |
| ZINC10472094 | -34.4592 |
| ZINC10611804 | -42.29   |
| ZINC10643055 | -41.9266 |



|              |          |
|--------------|----------|
| ZINC10688778 | -37.098  |
| ZINC10691072 | -47.8926 |
| ZINC10699430 | -31.0353 |
| ZINC10742803 | -45.3461 |
| ZINC10749741 | -56.5946 |
| ZINC10756312 | -44.2855 |
| ZINC10810774 | -42.4243 |
| ZINC10815974 | -44.7623 |
| ZINC10844565 | -43.2143 |
| ZINC10846171 | -46.6967 |
| ZINC10900727 | -40.0599 |
| ZINC10905060 | -46.1954 |
| ZINC11004274 | -47.5134 |
| ZINC11004658 | -23.7762 |
| ZINC11071704 | -49.7721 |
| ZINC11086262 | -34.0748 |
| ZINC11088152 | -28.6476 |
| ZINC11157318 | -30.5209 |
| ZINC11173771 | -41.1251 |
| ZINC11247022 | -46.3917 |
| ZINC11285318 | -48.0556 |
| ZINC11322841 | -46.5441 |
| ZINC11327125 | -36.5085 |
| ZINC11380126 | -39.1741 |
| ZINC11389667 | -34.3005 |
| ZINC11443185 | -37.6486 |
| ZINC11520623 | -34.3333 |
| ZINC11526394 | -38.4869 |
| ZINC11535718 | -26.969  |
| ZINC11536060 | -26.386  |
| ZINC11536060 | -28.229  |
| ZINC11536060 | -34.0473 |
| ZINC11536283 | -28.6334 |
| ZINC11544278 | -39.3612 |
| ZINC11567865 | -36.6387 |
| ZINC11568569 | -39.1287 |
| ZINC11613894 | -40.9196 |
| ZINC11615807 | -44.2204 |
| ZINC11661377 | -28.2561 |
| ZINC11666261 | -34.782  |
| ZINC11667134 | -32.7033 |
| ZINC11690300 | -36.4518 |
| ZINC11691444 | -42.5403 |
| ZINC11695836 | -46.0346 |

|              |          |
|--------------|----------|
| ZINC11716025 | -40.043  |
| ZINC11736746 | -30.1614 |
| ZINC11740080 | -41.6053 |
| ZINC11758293 | -31.3839 |
| ZINC11763440 | -45.9848 |
| ZINC11781283 | -31.4495 |
| ZINC11782091 | -40.4534 |
| ZINC11788827 | -35.1306 |
| ZINC11790229 | -29.5546 |
| ZINC11802989 | -26.3576 |
| ZINC11814693 | -43.1584 |
| ZINC11814697 | -33.5607 |
| ZINC11817195 | -33.6284 |
| ZINC11819682 | -41.4277 |
| ZINC11819682 | -49.4733 |
| ZINC11821798 | -22.2333 |
| ZINC11822143 | -29.779  |
| ZINC11822143 | -36.8346 |
| ZINC11841486 | -37.1764 |
| ZINC11842665 | -23.1568 |
| ZINC11842665 | -40.7836 |
| ZINC11846106 | -39.0362 |
| ZINC11849504 | -36.581  |
| ZINC11853773 | -40.1274 |
| ZINC11865194 | -32.336  |
| ZINC11866088 | -39.6563 |
| ZINC11878616 | -27.5708 |
| ZINC11878942 | -35.4822 |
| ZINC11879448 | -33.204  |
| ZINC11880264 | -45.9777 |
| ZINC11888191 | -37.2705 |
| ZINC11900343 | -33.48   |
| ZINC11900664 | -50.5557 |
| ZINC11907383 | -45.2809 |
| ZINC11907571 | -40.9651 |
| ZINC11907860 | -40.6319 |
| ZINC11916442 | -34.8849 |
| ZINC11917651 | -39.7758 |
| ZINC11932744 | -43.18   |
| ZINC11933641 | -33.8412 |
| ZINC11935049 | -46.8816 |
| ZINC11936971 | -36.8631 |
| ZINC11937636 | -31.163  |
| ZINC11957070 | -36.1316 |

|              |          |
|--------------|----------|
| ZINC11977431 | -41.4679 |
| ZINC11998171 | -36.0421 |
| ZINC12001767 | -44.3617 |
| ZINC12002060 | -29.4783 |
| ZINC12016188 | -32.7223 |
| ZINC12028194 | -41.4186 |
| ZINC12029380 | -45.1508 |
| ZINC12033635 | -39.5245 |
| ZINC12038095 | -23.9537 |
| ZINC12053763 | -38.2257 |
| ZINC12062795 | -37.3706 |
| ZINC12072162 | -47.223  |
| ZINC12080520 | -42.0533 |
| ZINC12086194 | -30.7037 |
| ZINC12087001 | -34.1239 |
| ZINC12087653 | -35.0435 |
| ZINC12087653 | -43.1496 |
| ZINC12092985 | -29.9263 |
| ZINC12113298 | -42.8037 |
| ZINC12113779 | -40.3417 |
| ZINC12113835 | -35.2741 |
| ZINC12113835 | -38.9235 |
| ZINC12117168 | -34.2142 |
| ZINC12117727 | -33.482  |
| ZINC12119207 | -39.8858 |
| ZINC12121546 | -52.9992 |
| ZINC12121799 | -27.4876 |
| ZINC12134000 | -30.7796 |
| ZINC12139030 | -39.9183 |
| ZINC12139584 | -28.642  |
| ZINC12139612 | -37.7962 |
| ZINC12144485 | -30.7805 |
| ZINC12167537 | -35.1033 |
| ZINC12175905 | -34.082  |
| ZINC12176702 | -37.1895 |
| ZINC12176702 | -46.918  |
| ZINC12182906 | -51.1629 |
| ZINC12183637 | -44.5651 |
| ZINC12183740 | -29.24   |
| ZINC12184001 | -37.8318 |
| ZINC12184113 | -38.9434 |
| ZINC12184697 | -38.4347 |
| ZINC12184697 | -39.027  |
| ZINC12185316 | -35.3397 |

|              |          |
|--------------|----------|
| ZINC12191536 | -39.98   |
| ZINC12204025 | -33.2244 |
| ZINC12207600 | -29.9567 |
| ZINC12218912 | -37.2645 |
| ZINC12222016 | -46.9654 |
| ZINC12222929 | -27.483  |
| ZINC12223317 | -35.927  |
| ZINC12236770 | -38.0187 |
| ZINC12241785 | -35.0823 |
| ZINC12243149 | -31.8816 |
| ZINC12249732 | -35.2698 |
| ZINC12256809 | -35.0014 |
| ZINC12273954 | -40.0122 |
| ZINC12275901 | -41.0481 |
| ZINC12280074 | -48.3704 |
| ZINC12288064 | -44.1388 |
| ZINC12302301 | -44.3182 |
| ZINC12302301 | -46.2747 |
| ZINC12304419 | -45.4899 |
| ZINC12306240 | -52.6148 |
| ZINC12308175 | -31.3039 |
| ZINC12308292 | -42.1373 |
| ZINC12309009 | -26.8012 |
| ZINC12314748 | -36.7845 |
| ZINC12315150 | -44.9513 |
| ZINC12318430 | -43.5675 |
| ZINC12321858 | -28.9579 |
| ZINC12323791 | -39.1233 |
| ZINC12323791 | -44.1162 |
| ZINC12324978 | -40.2577 |
| ZINC12326334 | -37.7684 |
| ZINC12329629 | -32.8259 |
| ZINC12329999 | -36.0799 |
| ZINC12331121 | -28.7493 |
| ZINC12334225 | -36.9103 |
| ZINC12334225 | -41.6075 |
| ZINC12337203 | -32.2987 |
| ZINC12337386 | -49.2066 |
| ZINC12338037 | -36.4744 |
| ZINC12338253 | -41.8241 |
| ZINC12339957 | -43.7006 |
| ZINC12341384 | -26.2155 |
| ZINC12344049 | -39.2866 |
| ZINC12345767 | -38.244  |

|              |          |
|--------------|----------|
| ZINC12346428 | -42.7661 |
| ZINC12347665 | -33.3971 |
| ZINC12352243 | -35.3155 |
| ZINC12361064 | -38.3342 |
| ZINC12363690 | -27.9474 |
| ZINC12364018 | -27.8885 |
| ZINC12364207 | -40.2014 |
| ZINC12367334 | -29.8647 |
| ZINC12368172 | -33.7897 |
| ZINC12368508 | -47.9441 |
| ZINC12368704 | -43.4264 |
| ZINC12369295 | -46.9202 |
| ZINC12370207 | -33.7301 |
| ZINC12370568 | -25.4506 |
| ZINC12376099 | -47.8968 |
| ZINC12383925 | -36.9141 |
| ZINC12387665 | -29.7238 |
| ZINC12394735 | -43.5445 |
| ZINC12396592 | -37.4163 |
| ZINC12402523 | -29.6323 |
| ZINC12403731 | -38.5873 |
| ZINC12409952 | -44.461  |
| ZINC12410298 | -40.1549 |
| ZINC12411988 | -44.9163 |
| ZINC12412896 | -39.4714 |
| ZINC12413729 | -35.302  |
| ZINC12417488 | -38.8034 |
| ZINC12417501 | -38.9487 |
| ZINC12417869 | -38.7706 |
| ZINC12418444 | -26.6889 |
| ZINC12418445 | -35.5594 |
| ZINC12419347 | -30.7835 |
| ZINC12419801 | -25.7187 |
| ZINC12420806 | -41.5767 |
| ZINC12429904 | -38.4266 |
| ZINC12442577 | -30.2597 |
| ZINC12447835 | -32.7395 |
| ZINC12453195 | -39.7036 |
| ZINC12456691 | -47.5304 |
| ZINC12456786 | -43.4019 |
| ZINC12462517 | -42.3305 |
| ZINC12464100 | -28.9506 |
| ZINC12468305 | -43.8233 |
| ZINC12468966 | -39.331  |

|              |          |
|--------------|----------|
| ZINC12469205 | -36.269  |
| ZINC12483857 | -42.5958 |
| ZINC12485929 | -35.4858 |
| ZINC12495694 | -28.9356 |
| ZINC12497262 | -33.4954 |
| ZINC12513610 | -37.9243 |
| ZINC12516695 | -29.8781 |
| ZINC12517199 | -35.3894 |
| ZINC12520147 | -41.9952 |
| ZINC12520147 | -43.0165 |
| ZINC12521802 | -20.2988 |
| ZINC12526097 | -42.4219 |
| ZINC12528253 | -39.7219 |
| ZINC12530642 | -29.9976 |
| ZINC12535388 | -47.9752 |
| ZINC12535388 | -49.7365 |
| ZINC12537022 | -30.357  |
| ZINC12540719 | -37.0098 |
| ZINC12541397 | -34.3257 |
| ZINC12541397 | -44.9451 |
| ZINC12543323 | -40.6902 |
| ZINC12543559 | -39.3852 |
| ZINC12543750 | -35.799  |
| ZINC12547943 | -44.4375 |
| ZINC12548840 | -44.4246 |
| ZINC12551250 | -36.1279 |
| ZINC12553143 | -37.2954 |
| ZINC12553230 | -40.2274 |
| ZINC12557856 | -30.6994 |
| ZINC12561465 | -40.4891 |
| ZINC12562226 | -47.2721 |
| ZINC12563221 | -39.9168 |
| ZINC12566057 | -39.8474 |
| ZINC12566741 | -52.7854 |
| ZINC12569218 | -32.0996 |
| ZINC12572139 | -26.8367 |
| ZINC12575450 | -32.0992 |
| ZINC12580345 | -21.9991 |
| ZINC12580345 | -42.8368 |
| ZINC12592542 | -37.448  |
| ZINC12593778 | -39.1286 |
| ZINC12598759 | -33.1034 |
| ZINC12599819 | -44.5002 |
| ZINC12601140 | -35.0049 |

|              |          |
|--------------|----------|
| ZINC12602525 | -34.6151 |
| ZINC12615591 | -41.0148 |
| ZINC12616465 | -39.4469 |
| ZINC12622489 | -34.6015 |
| ZINC12623488 | -45.8271 |
| ZINC12627972 | -43.0518 |
| ZINC12644349 | -47.37   |
| ZINC12644432 | -31.2886 |
| ZINC12658261 | -44.0973 |
| ZINC12664197 | -38.229  |
| ZINC12682618 | -29.6788 |
| ZINC12682618 | -38.1494 |
| ZINC12683124 | -34.0395 |
| ZINC12685661 | -44.6401 |
| ZINC12690907 | -38.9436 |
| ZINC12710542 | -41.1487 |
| ZINC12733339 | -40.1274 |
| ZINC12733339 | -50.8132 |
| ZINC12734207 | -30.7481 |
| ZINC12747139 | -26.8031 |
| ZINC12750450 | -52.6575 |
| ZINC12755380 | -40.0765 |
| ZINC12756061 | -38.4423 |
| ZINC12756409 | -36.2008 |
| ZINC12758186 | -30.3803 |
| ZINC12763552 | -37.884  |
| ZINC12763979 | -38.4671 |
| ZINC12771868 | -41.4661 |
| ZINC12774285 | -39.2072 |
| ZINC12774534 | -48.1977 |
| ZINC12774730 | -45.7129 |
| ZINC12781209 | -43.9004 |
| ZINC12782539 | -37.5801 |
| ZINC12800394 | -39.4604 |
| ZINC12805474 | -34.8057 |
| ZINC12807921 | -32.6735 |
| ZINC12814966 | -31.5058 |
| ZINC12815324 | -37.298  |
| ZINC12816101 | -28.3322 |
| ZINC12816101 | -34.3806 |
| ZINC12816338 | -41.7487 |
| ZINC12817606 | -41.9725 |
| ZINC12817857 | -40.1805 |
| ZINC12855001 | -43.5667 |

|              |          |
|--------------|----------|
| ZINC12856216 | -37.9896 |
| ZINC12858034 | -41.5217 |
| ZINC12877276 | -30.6351 |
| ZINC12879538 | -36.9137 |
| ZINC12880723 | -49.8036 |
| ZINC12884281 | -49.4823 |
| ZINC12887522 | -46.4003 |
| ZINC12909700 | -35.7706 |
| ZINC12912084 | -38.9116 |
| ZINC12912283 | -28.8778 |
| ZINC12912950 | -41.0126 |
| ZINC12913008 | -33.0517 |
| ZINC12916743 | -44.8198 |
| ZINC12917484 | -25.9482 |
| ZINC12919114 | -35.6296 |
| ZINC12925763 | -40.3154 |
| ZINC12930015 | -49.6516 |
| ZINC12932066 | -46.2952 |
| ZINC12932913 | -38.229  |
| ZINC12932913 | -47.8803 |
| ZINC12933582 | -32.7118 |
| ZINC12933582 | -37.8877 |
| ZINC12935885 | -35.5296 |
| ZINC12943288 | -33.2692 |
| ZINC12947470 | -49.6137 |
| ZINC12949311 | -33.5972 |
| ZINC12949800 | -46.0738 |
| ZINC12956522 | -27.4847 |
| ZINC12977907 | -43.7627 |
| ZINC12980319 | -48.956  |
| ZINC12981608 | -40.8995 |
| ZINC12981757 | -42.8051 |
| ZINC12985182 | -41.5245 |
| ZINC12985432 | -37.7153 |
| ZINC12986413 | -36.6039 |
| ZINC12986658 | -42.1178 |
| ZINC12986709 | -42.1221 |
| ZINC12986966 | -40.3141 |
| ZINC12988087 | -28.4395 |
| ZINC12997569 | -37.6511 |
| ZINC12998361 | -43.5921 |
| ZINC13004939 | -32.6653 |
| ZINC13004939 | -35.8805 |
| ZINC13004939 | -40.438  |



|              |          |
|--------------|----------|
| ZINC13029459 | -30.8417 |
| ZINC13036395 | -32.681  |
| ZINC13038679 | -28.4945 |
| ZINC13038679 | -43.0759 |
| ZINC13058204 | -43.5359 |
| ZINC13061821 | -55.8663 |
| ZINC13068520 | -40.0688 |
| ZINC13069605 | -39.1092 |
| ZINC13074917 | -49.7121 |
| ZINC13076644 | -39.3999 |
| ZINC13092156 | -51.4353 |
| ZINC13092445 | -53.9301 |
| ZINC13094910 | -45.3396 |
| ZINC13096032 | -38.5668 |
| ZINC13096442 | -40.1415 |
| ZINC13099276 | -39.5422 |
| ZINC13100765 | -29.6855 |
| ZINC13112974 | -42.3736 |
| ZINC13118893 | -22.0579 |
| ZINC13119497 | -38.8109 |
| ZINC13119538 | -46.5041 |
| ZINC13120677 | -40.6861 |
| ZINC13120677 | -52.5647 |
| ZINC13121823 | -37.5065 |
| ZINC13122216 | -38.9866 |
| ZINC13122263 | -37.8767 |
| ZINC13122263 | -40.6117 |
| ZINC13122263 | -41.0058 |
| ZINC13122343 | -32.2988 |
| ZINC13124474 | -38.6946 |
| ZINC13125573 | -36.183  |
| ZINC13126978 | -28.4855 |
| ZINC13126978 | -29.2477 |
| ZINC13129218 | -31.7951 |
| ZINC13134513 | -49.7196 |
| ZINC13134513 | -51.3061 |
| ZINC13141169 | -51.6288 |
| ZINC13141675 | -31.4141 |
| ZINC13141675 | -37.4044 |
| ZINC13153139 | -32.2568 |
| ZINC13153854 | -31.6694 |
| ZINC13154246 | -46.1376 |
| ZINC13154912 | -37.8467 |
| ZINC13154912 | -38.1622 |

|              |          |
|--------------|----------|
| ZINC13161713 | -23.5791 |
| ZINC13161713 | -28.3073 |
| ZINC13161713 | -32.1849 |
| ZINC13207124 | -35.2218 |
| ZINC13208208 | -31.09   |
| ZINC13213746 | -40.7005 |
| ZINC13213783 | -37.2615 |
| ZINC13248968 | -47.7823 |
| ZINC13260735 | -44.4026 |
| ZINC13282445 | -28.583  |
| ZINC13285785 | -56.0582 |
| ZINC13305955 | -49.3101 |
| ZINC13320997 | -42.9773 |
| ZINC13321222 | -47.2903 |
| ZINC13331762 | -31.7416 |
| ZINC13395229 | -44.8438 |
| ZINC13403895 | -27.1722 |
| ZINC13407427 | -33.7102 |
| ZINC13424651 | -20.973  |
| ZINC13466938 | -29.6341 |
| ZINC13467220 | -23.6383 |
| ZINC13471082 | -40.4926 |
| ZINC13476624 | -43.3855 |
| ZINC13476624 | -43.9353 |
| ZINC13482521 | -29.4119 |
| ZINC13496078 | -27.6165 |
| ZINC13496731 | -35.0452 |
| ZINC13496731 | -37.0737 |
| ZINC13497293 | -47.7753 |
| ZINC13503815 | -29.0287 |
| ZINC13504962 | -32.5829 |
| ZINC13511310 | -30.3263 |
| ZINC13511448 | -34.5655 |
| ZINC13512068 | -30.1333 |
| ZINC13512242 | -35.0605 |
| ZINC13512376 | -23.5451 |
| ZINC13512508 | -31.2524 |
| ZINC13539894 | -44.0813 |
| ZINC13546440 | -30.6528 |
| ZINC13549095 | -39.7148 |
| ZINC13549142 | -40.0564 |
| ZINC13551488 | -36.5904 |
| ZINC13561612 | -33.7058 |
| ZINC13567806 | -30.502  |

|              |          |
|--------------|----------|
| ZINC13568712 | -42.3737 |
| ZINC13568712 | -55.4362 |
| ZINC13569927 | -32.5431 |
| ZINC13569927 | -36.5612 |
| ZINC13571455 | -30.7278 |
| ZINC13571455 | -31.8528 |
| ZINC13573443 | -37.7994 |
| ZINC13574891 | -43.1468 |
| ZINC13591052 | -31.0028 |
| ZINC13606862 | -29.558  |
| ZINC13617265 | -35.7746 |
| ZINC13617265 | -38.6394 |
| ZINC13624960 | -40.5075 |
| ZINC13626258 | -41.3266 |
| ZINC13628979 | -50.5563 |
| ZINC13629369 | -50.5997 |
| ZINC13629661 | -42.1815 |
| ZINC13629981 | -23.6804 |
| ZINC13638122 | -48.4278 |
| ZINC13640103 | -29.1156 |
| ZINC13640405 | -33.1947 |
| ZINC13641677 | -32.6682 |
| ZINC13642049 | -35.4088 |
| ZINC13653871 | -21.354  |
| ZINC13669148 | -31.2211 |
| ZINC13669743 | -38.2115 |
| ZINC13671004 | -34.6865 |
| ZINC13688566 | -33.151  |
| ZINC13688801 | -47.4949 |
| ZINC13688954 | -28.1516 |
| ZINC13689518 | -43.5172 |
| ZINC13689667 | -39.483  |
| ZINC13689802 | -31.0643 |
| ZINC13689802 | -36.7085 |
| ZINC13690346 | -31.1933 |
| ZINC13690346 | -33.9925 |
| ZINC13692437 | -43.3522 |
| ZINC13698199 | -40.8495 |
| ZINC13720674 | -37.0884 |
| ZINC13722232 | -29.3184 |
| ZINC13722232 | -44.8609 |
| ZINC13722557 | -30.9471 |
| ZINC13722557 | -31.507  |
| ZINC13728484 | -52.8042 |

|              |          |
|--------------|----------|
| ZINC13729393 | -29.3066 |
| ZINC13732684 | -30.8421 |
| ZINC13732684 | -35.6829 |
| ZINC13736292 | -34.7107 |
| ZINC13736743 | -37.633  |
| ZINC13747777 | -38.2172 |
| ZINC13757679 | -31.1636 |
| ZINC13757679 | -40.9241 |
| ZINC13757679 | -42.0469 |
| ZINC13757679 | -42.1179 |
| ZINC13757679 | -44.9877 |
| ZINC13758705 | -28.2064 |
| ZINC13768404 | -38.5929 |
| ZINC13784479 | -44.3556 |
| ZINC13789402 | -38.8018 |
| ZINC13789458 | -44.358  |
| ZINC13790199 | -33.1557 |
| ZINC13790199 | -38.0549 |
| ZINC13804934 | -47.3372 |
| ZINC13805582 | -39.4247 |
| ZINC13810589 | -31.9762 |
| ZINC13810790 | -39.0793 |
| ZINC13840372 | -36.5023 |
| ZINC13856968 | -31.8568 |
| ZINC13881073 | -36.5068 |
| ZINC13881311 | -38.1774 |
| ZINC13893466 | -42.1429 |
| ZINC13894668 | -51.9838 |
| ZINC13941188 | -34.3858 |
| ZINC13943258 | -51.1127 |
| ZINC13957003 | -25.5399 |
| ZINC13960276 | -44.4334 |
| ZINC13973445 | -34.2535 |
| ZINC13986081 | -39.0632 |
| ZINC13988515 | -39.25   |
| ZINC14000255 | -39.193  |
| ZINC14000255 | -43.2878 |
| ZINC14000490 | -43.6084 |
| ZINC14002728 | -37.2322 |
| ZINC14020083 | -41.8281 |
| ZINC14020849 | -38.4478 |
| ZINC14021842 | -42.0806 |
| ZINC14038673 | -46.8177 |
| ZINC14050094 | -47.0821 |

|              |          |
|--------------|----------|
| ZINC14059141 | -34.9122 |
| ZINC14064691 | -51.0679 |
| ZINC14086188 | -39.3192 |
| ZINC14093783 | -23.3369 |
| ZINC14116446 | -37.9316 |
| ZINC14121191 | -54.6107 |
| ZINC14137538 | -38.5099 |
| ZINC14162293 | -16.1989 |
| ZINC14162357 | -44.6198 |
| ZINC14181170 | -41.9865 |
| ZINC14185239 | -32.7737 |
| ZINC14185468 | -37.2237 |
| ZINC14187150 | -28.6214 |
| ZINC14187472 | -39.5536 |
| ZINC14187472 | -41.2094 |
| ZINC14187826 | -49.271  |
| ZINC14196711 | -34.6019 |
| ZINC14201516 | -36.3082 |
| ZINC14215233 | -24.3588 |
| ZINC14215233 | -30.9468 |
| ZINC14220162 | -41.548  |
| ZINC14233941 | -41.6441 |
| ZINC14241021 | -32.4311 |
| ZINC14247780 | -33.5242 |
| ZINC14254316 | -26.4884 |
| ZINC14257517 | -47.7148 |
| ZINC14258308 | -41.5928 |
| ZINC14270749 | -40.4522 |
| ZINC14284795 | -47.2289 |
| ZINC14310267 | -31.1129 |
| ZINC14310267 | -41.4077 |
| ZINC14366259 | -30.6345 |
| ZINC14383228 | -29.4001 |
| ZINC14455812 | -35.4481 |
| ZINC14456370 | -36.6213 |
| ZINC14456867 | -40.7112 |
| ZINC14457479 | -43.6138 |
| ZINC14458976 | -31.6231 |
| ZINC14458982 | -33.4647 |
| ZINC14459329 | -34.4655 |
| ZINC14459530 | -28.9576 |
| ZINC14459596 | -28.1293 |
| ZINC14459606 | -21.592  |
| ZINC14459876 | -34.894  |

|              |          |
|--------------|----------|
| ZINC14460077 | -32.2244 |
| ZINC14460828 | -35.266  |
| ZINC14461525 | -33.5512 |
| ZINC14468398 | -30.7842 |
| ZINC14520627 | -36.1505 |
| ZINC14520627 | -41.5611 |
| ZINC14531825 | -29.9888 |
| ZINC14537294 | -26.4409 |
| ZINC14537294 | -31.7905 |
| ZINC14538150 | -43.8028 |
| ZINC14540550 | -33.2132 |
| ZINC14540700 | -39.9648 |
| ZINC14542873 | -35.3576 |
| ZINC14542874 | -34.3724 |
| ZINC14546400 | -32.5302 |
| ZINC14546694 | -28.5962 |
| ZINC14546795 | -26.9585 |
| ZINC14547356 | -35.6562 |
| ZINC14548324 | -36.3419 |
| ZINC14550961 | -36.1874 |
| ZINC14554785 | -42.7847 |
| ZINC14607559 | -32.7435 |
| ZINC14607559 | -37.6098 |
| ZINC14607708 | -29.1433 |
| ZINC14607888 | -30.9186 |
| ZINC14607888 | -34.3416 |
| ZINC14610133 | -36.7814 |
| ZINC14610644 | -48.1592 |
| ZINC14610915 | -45.1739 |
| ZINC14611195 | -47.0375 |
| ZINC14625303 | -32.1925 |
| ZINC14629137 | -46.5874 |
| ZINC14632434 | -35.7775 |
| ZINC14632655 | -38.4322 |
| ZINC14642852 | -44.1617 |
| ZINC14656094 | -38.5505 |
| ZINC14660639 | -43.1933 |
| ZINC14666079 | -27.577  |
| ZINC14668160 | -47.3118 |
| ZINC14730764 | -34.9186 |
| ZINC14748047 | -39.1745 |
| ZINC14748762 | -22.6593 |
| ZINC14749681 | -32.0882 |
| ZINC14765313 | -22.2444 |

|              |          |
|--------------|----------|
| ZINC14770043 | -39.4649 |
| ZINC14770700 | -38.463  |
| ZINC14783467 | -38.5214 |
| ZINC14821962 | -46.7726 |
| ZINC14834593 | -45.2597 |
| ZINC14880700 | -33.4774 |
| ZINC14880718 | -27.3726 |
| ZINC14881961 | -38.2593 |
| ZINC14881969 | -31.1389 |
| ZINC14883023 | -30.2236 |
| ZINC14885210 | -30.5356 |
| ZINC14886008 | -39.6618 |
| ZINC14898235 | -44.9272 |
| ZINC14944142 | -26.2287 |
| ZINC14944373 | -38.3835 |
| ZINC14944414 | -37.2563 |
| ZINC14944993 | -29.3989 |
| ZINC14960953 | -43.6772 |
| ZINC14970426 | -28.4007 |
| ZINC14971458 | -24.9601 |
| ZINC14975807 | -21.2474 |
| ZINC14975807 | -25.9135 |
| ZINC14978068 | -39.2093 |
| ZINC14981551 | -31.5706 |
| ZINC14982248 | -24.7928 |
| ZINC14984991 | -35.2136 |
| ZINC14985634 | -51.3244 |
| ZINC14986066 | -35.708  |
| ZINC14992377 | -32.9085 |
| ZINC14999961 | -36.6682 |
| ZINC15000925 | -28.4849 |
| ZINC15002270 | -39.9447 |
| ZINC15007999 | -49.7129 |
| ZINC15010987 | -44.5166 |
| ZINC15015230 | -45.0729 |
| ZINC15019228 | -27.6557 |
| ZINC15021427 | -32.2988 |
| ZINC15035085 | -40.1543 |
| ZINC15035610 | -44.4929 |
| ZINC15039395 | -40.9678 |
| ZINC15048633 | -36.8304 |
| ZINC15049874 | -41.746  |
| ZINC15050869 | -40.3445 |
| ZINC15057208 | -54.1215 |

|              |          |
|--------------|----------|
| ZINC15062207 | -28.7926 |
| ZINC15062207 | -32.9774 |
| ZINC15062488 | -36.7284 |
| ZINC15063299 | -26.235  |
| ZINC15063299 | -34.7841 |
| ZINC15064166 | -37.5512 |
| ZINC15066615 | -42.4798 |
| ZINC15072263 | -41.9169 |
| ZINC15079630 | -35.3841 |
| ZINC15081302 | -36.0869 |
| ZINC15082127 | -28.5873 |
| ZINC15084811 | -29.2095 |
| ZINC15085954 | -44.7649 |
| ZINC15086017 | -30.3052 |
| ZINC15086017 | -32.2207 |
| ZINC15086017 | -36.8834 |
| ZINC15108220 | -39.9524 |
| ZINC15114179 | -23.2516 |
| ZINC15125044 | -39.2754 |
| ZINC15205352 | -40.4571 |
| ZINC15206309 | -32.4011 |
| ZINC15206360 | -41.1366 |
| ZINC15231398 | -29.7369 |
| ZINC15248789 | -30.2294 |
| ZINC15250696 | -34.0413 |
| ZINC15281214 | -38.6432 |
| ZINC15303705 | -40.5109 |
| ZINC15306579 | -14.4279 |
| ZINC15306579 | -27.5204 |
| ZINC15335671 | -30.3209 |
| ZINC15354226 | -39.5196 |
| ZINC15365057 | -31.855  |
| ZINC15401592 | -26.2959 |
| ZINC15418331 | -35.5864 |
| ZINC15434141 | -29.8429 |
| ZINC15435317 | -46.9221 |
| ZINC15441714 | -29.7352 |
| ZINC15441754 | -36.7201 |
| ZINC15453278 | -37.8559 |
| ZINC15454115 | -37.3581 |
| ZINC15454115 | -38.1883 |
| ZINC15455498 | -36.6676 |
| ZINC15455592 | -30.8181 |
| ZINC15456418 | -39.5011 |



|              |          |
|--------------|----------|
| ZINC15464665 | -29.67   |
| ZINC15466080 | -31.7667 |
| ZINC15497668 | -31.3549 |
| ZINC15537580 | -43.4487 |
| ZINC15557143 | -43.5164 |
| ZINC15562174 | -36.713  |
| ZINC15569500 | -29.0162 |
| ZINC15570401 | -28.0827 |
| ZINC15588483 | -40.7294 |
| ZINC15592066 | -36.5666 |
| ZINC15658711 | -45.9881 |
| ZINC15671781 | -40.17   |
| ZINC15675499 | -40.5307 |
| ZINC15675894 | -40.7298 |
| ZINC15676292 | -36.824  |
| ZINC15676292 | -42.5261 |
| ZINC15677416 | -50.4933 |
| ZINC15679891 | -32.4612 |
| ZINC15680028 | -35.5277 |
| ZINC15684471 | -41.0844 |
| ZINC15707228 | -30.016  |
| ZINC15707228 | -33.7009 |
| ZINC15707228 | -38.039  |
| ZINC15731467 | -60.0497 |
| ZINC15768061 | -27.746  |
| ZINC15768061 | -34.7078 |
| ZINC15768611 | -40.7003 |
| ZINC15775392 | -40.3341 |
| ZINC15778125 | -40.6871 |
| ZINC15778125 | -49.2768 |
| ZINC15778149 | -36.0775 |
| ZINC15784805 | -30.1142 |
| ZINC15786843 | -40.4367 |
| ZINC15786844 | -42.7998 |
| ZINC15829448 | -31.6119 |
| ZINC15829876 | -45.423  |
| ZINC15833115 | -38.4213 |
| ZINC15833902 | -32.5728 |
| ZINC15834433 | -28.8307 |
| ZINC15834579 | -40.6363 |
| ZINC15842632 | -33.2457 |
| ZINC15859899 | -40.5588 |
| ZINC15860187 | -42.3532 |
| ZINC15860306 | -42.5809 |

|              |          |
|--------------|----------|
| ZINC15863969 | -27.1441 |
| ZINC15869167 | -37.9775 |
| ZINC15904493 | -48.0116 |
| ZINC15905454 | -43.5718 |
| ZINC15905552 | -31.7129 |
| ZINC15910389 | -40.0591 |
| ZINC15914347 | -35.6184 |
| ZINC15914718 | -44.2413 |
| ZINC15932110 | -37.8862 |
| ZINC15933214 | -38.1286 |
| ZINC15952564 | -37.3249 |
| ZINC15952564 | -38.9753 |
| ZINC15952564 | -41.9911 |
| ZINC15953091 | -35.4229 |
| ZINC15956835 | -28.0628 |
| ZINC15961651 | -24.3408 |
| ZINC15961651 | -29.7681 |
| ZINC15961651 | -34.1264 |
| ZINC15969136 | -29.2274 |
| ZINC15972406 | -30.1106 |
| ZINC15986515 | -40.3665 |
| ZINC15990364 | -24.3721 |
| ZINC15990364 | -29.6882 |
| ZINC16001845 | -23.9107 |
| ZINC16001845 | -26.8417 |
| ZINC16009740 | -31.246  |
| ZINC16009877 | -31.5123 |
| ZINC16009877 | -32.5465 |
| ZINC16019804 | -32.5702 |
| ZINC16022207 | -29.1147 |
| ZINC16022207 | -33.6664 |
| ZINC16024531 | -27.7646 |
| ZINC16024923 | -25.9002 |
| ZINC16024923 | -32.8318 |
| ZINC16032562 | -29.303  |
| ZINC16037547 | -31.6812 |
| ZINC16085162 | -43.5876 |
| ZINC16086102 | -25.804  |
| ZINC16088755 | -42.6641 |
| ZINC16090693 | -33.793  |
| ZINC16121737 | -32.8255 |
| ZINC16124529 | -31.6378 |
| ZINC16129246 | -42.5301 |
| ZINC16158495 | -25.0815 |

|              |          |
|--------------|----------|
| ZINC16158770 | -31.5051 |
| ZINC16159215 | -24.116  |
| ZINC16183738 | -43.2363 |
| ZINC16183738 | -54.9208 |
| ZINC16184858 | -40.9774 |
| ZINC16189349 | -35.8504 |
| ZINC16194816 | -39.9044 |
| ZINC16213227 | -34.2214 |
| ZINC16217209 | -37.4436 |
| ZINC16228049 | -29.8797 |
| ZINC16228049 | -30.1107 |
| ZINC16228049 | -31.5514 |
| ZINC16234069 | -37.7744 |
| ZINC16243475 | -32.822  |
| ZINC16247920 | -28.8505 |
| ZINC16265874 | -43.3299 |
| ZINC16268219 | -37.4484 |
| ZINC16274255 | -39.4911 |
| ZINC16281545 | -45.0341 |
| ZINC16284633 | -38.3411 |
| ZINC16292797 | -36.714  |
| ZINC16292837 | -25.5289 |
| ZINC16310232 | -41.9948 |
| ZINC16310778 | -24.2083 |
| ZINC16310778 | -29.4556 |
| ZINC16350951 | -34.0666 |
| ZINC16352005 | -44.0448 |
| ZINC16383082 | -38.2346 |
| ZINC16383082 | -38.9212 |
| ZINC16401856 | -40.8714 |
| ZINC16423597 | -34.7187 |
| ZINC16423597 | -37.5365 |
| ZINC16429299 | -42.5227 |
| ZINC16447799 | -36.4659 |
| ZINC16448092 | -32.0599 |
| ZINC16449894 | -42.4047 |
| ZINC16481328 | -47.2273 |
| ZINC16503908 | -33.5174 |
| ZINC16575443 | -28.6959 |
| ZINC16575443 | -33.3783 |
| ZINC16576051 | -56.6888 |
| ZINC16578118 | -31.5082 |
| ZINC16578118 | -40.7442 |
| ZINC16604995 | -35.1826 |

|              |          |
|--------------|----------|
| ZINC16622419 | -32.8909 |
| ZINC16643489 | -36.5341 |
| ZINC16661415 | -29.6582 |
| ZINC16662920 | -36.1504 |
| ZINC16663057 | -33.2364 |
| ZINC16663057 | -33.6361 |
| ZINC16663057 | -35.1833 |
| ZINC16663445 | -34.5774 |
| ZINC16667499 | -36.7111 |
| ZINC16672961 | -48.1927 |
| ZINC16675842 | -35.0105 |
| ZINC16678193 | -42.2199 |
| ZINC16682629 | -51.2845 |
| ZINC16694385 | -33.8882 |
| ZINC16730264 | -37.2243 |
| ZINC16733796 | -39.5888 |
| ZINC16733796 | -42.0944 |
| ZINC16739837 | -38.5669 |
| ZINC16741222 | -30.201  |
| ZINC16741908 | -33.9895 |
| ZINC16742372 | -37.9299 |
| ZINC16750516 | -29.607  |
| ZINC16752167 | -28.787  |
| ZINC16752599 | -31.1428 |
| ZINC16790337 | -30.5566 |
| ZINC16790338 | -25.5491 |
| ZINC16807470 | -31.4896 |
| ZINC16808142 | -32.7413 |
| ZINC16808376 | -33.2949 |
| ZINC16808637 | -42.1884 |
| ZINC16808669 | -38.2242 |
| ZINC16808916 | -36.6663 |
| ZINC16841352 | -27.8457 |
| ZINC16841585 | -34.8817 |
| ZINC16843704 | -41.0985 |
| ZINC16844365 | -31.2651 |
| ZINC16844365 | -41.1271 |
| ZINC16844650 | -44.8913 |
| ZINC16851947 | -33.9875 |
| ZINC16855098 | -38.8575 |
| ZINC16856166 | -38.5445 |
| ZINC16857316 | -33.8676 |
| ZINC16880776 | -38.5763 |
| ZINC16884616 | -31.1658 |

|              |          |
|--------------|----------|
| ZINC16899457 | -47.208  |
| ZINC16899559 | -35.4986 |
| ZINC16900164 | -46.9145 |
| ZINC16901896 | -47.818  |
| ZINC16902102 | -41.71   |
| ZINC16905813 | -45.7447 |
| ZINC16906064 | -52.9071 |
| ZINC16911179 | -49.8273 |
| ZINC16916187 | -39.8632 |
| ZINC16922126 | -39.729  |
| ZINC16923064 | -39.9381 |
| ZINC16924681 | -38.2726 |
| ZINC16924881 | -56.2275 |
| ZINC16925000 | -45.8217 |
| ZINC16925844 | -45.6914 |
| ZINC16930904 | -48.6884 |
| ZINC16936319 | -47.2554 |
| ZINC16940576 | -42.5987 |
| ZINC16948389 | -36.091  |
| ZINC16955760 | -35.8544 |
| ZINC16958317 | -44.7919 |
| ZINC16958817 | -31.5498 |
| ZINC16964464 | -35.6542 |
| ZINC16970592 | -31.2686 |
| ZINC16972905 | -32.5919 |
| ZINC16972983 | -38.8234 |
| ZINC16989661 | -40.2524 |
| ZINC16993926 | -36.3555 |
| ZINC17009032 | -37.0049 |
| ZINC17015577 | -24.5654 |
| ZINC17015577 | -33.4189 |
| ZINC17020754 | -30.3885 |
| ZINC17021063 | -40.6246 |
| ZINC17028119 | -34.1597 |
| ZINC17028895 | -40.7342 |
| ZINC17060314 | -40.1018 |
| ZINC17067226 | -43.7827 |
| ZINC17071734 | -36.4186 |
| ZINC17071954 | -36.0199 |
| ZINC17072682 | -31.8422 |
| ZINC17074563 | -43.7722 |
| ZINC17076778 | -47.619  |
| ZINC17076778 | -49.8298 |
| ZINC17077059 | -42.01   |

|              |          |
|--------------|----------|
| ZINC17079381 | -25.9904 |
| ZINC17081810 | -40.0225 |
| ZINC17082666 | -45.8788 |
| ZINC17085453 | -34.1897 |
| ZINC17085453 | -37.1386 |
| ZINC17086327 | -31.7062 |
| ZINC17095571 | -43.7151 |
| ZINC17095571 | -47.5809 |
| ZINC17096532 | -38.8621 |
| ZINC17111763 | -36.7586 |
| ZINC17112495 | -35.9932 |
| ZINC17112655 | -27.1098 |
| ZINC17112655 | -29.8526 |
| ZINC17112655 | -35.3769 |
| ZINC17113602 | -34.0161 |
| ZINC17117828 | -33.3639 |
| ZINC17138571 | -41.577  |
| ZINC17149731 | -23.6548 |
| ZINC17156215 | -36.7459 |
| ZINC17162657 | -32.5982 |
| ZINC17164366 | -45.1491 |
| ZINC17169824 | -36.5876 |
| ZINC17180061 | -33.776  |
| ZINC17180481 | -29.2705 |
| ZINC17180481 | -39.9884 |
| ZINC17188346 | -37.4564 |
| ZINC17197222 | -24.8154 |
| ZINC17207663 | -45.8958 |
| ZINC17211438 | -40.8488 |
| ZINC17211438 | -48.333  |
| ZINC17212668 | -47.2431 |
| ZINC17242099 | -56.4816 |
| ZINC17248991 | -46.2235 |
| ZINC17250036 | -41.8495 |
| ZINC17250417 | -47.613  |
| ZINC17252546 | -37.999  |
| ZINC17268850 | -36.5508 |
| ZINC17268850 | -40.8391 |
| ZINC17309668 | -38.0989 |
| ZINC17326077 | -38.0477 |
| ZINC17327312 | -42.9301 |
| ZINC17353221 | -36.2289 |
| ZINC17723776 | -36.011  |
| ZINC17730024 | -28.4617 |

|              |          |
|--------------|----------|
| ZINC17749224 | -37.8497 |
| ZINC17778358 | -34.3081 |
| ZINC17780337 | -37.6884 |
| ZINC17815812 | -48.1282 |
| ZINC17837565 | -37.5756 |
| ZINC17857799 | -47.3071 |
| ZINC17857799 | -52.5097 |
| ZINC17860988 | -41.8146 |
| ZINC17862477 | -51.8674 |
| ZINC17921318 | -27.5275 |
| ZINC17957550 | -36.6027 |
| ZINC17959493 | -38.229  |
| ZINC17983007 | -45.8907 |
| ZINC18039582 | -39.7069 |
| ZINC18042398 | -33.7368 |
| ZINC18042398 | -38.1737 |
| ZINC18067558 | -36.8528 |
| ZINC18077457 | -43.3013 |
| ZINC18132425 | -44.5316 |
| ZINC18140768 | -29.5562 |
| ZINC18155179 | -33.9356 |
| ZINC18167392 | -32.3311 |
| ZINC18167392 | -35.9391 |
| ZINC18180976 | -37.0124 |
| ZINC18194078 | -26.3247 |
| ZINC18194095 | -44.444  |
| ZINC18195745 | -36.0086 |
| ZINC18195745 | -38.078  |
| ZINC18195745 | -42.2215 |
| ZINC18196155 | -33.5676 |
| ZINC18196155 | -35.332  |
| ZINC18196523 | -31.3415 |
| ZINC18207504 | -23.7532 |
| ZINC18207504 | -27.4967 |
| ZINC18209832 | -30.2149 |
| ZINC18228763 | -29.8382 |
| ZINC18244345 | -40.3238 |
| ZINC18250447 | -37.7087 |
| ZINC18250447 | -46.7227 |
| ZINC18271541 | -41.8846 |
| ZINC18271541 | -46.3197 |
| ZINC18272329 | -44.0497 |
| ZINC18283659 | -32.4828 |
| ZINC18283659 | -43.4275 |

|              |          |
|--------------|----------|
| ZINC18285519 | -27.5747 |
| ZINC18399496 | -44.0919 |
| ZINC18532855 | -43.3309 |
| ZINC18891191 | -34.2407 |
| ZINC18920517 | -34.6126 |
| ZINC19022327 | -39.0994 |
| ZINC19077952 | -40.1654 |
| ZINC19077952 | -57.4574 |
| ZINC19090818 | -26.3423 |
| ZINC19096629 | -27.3826 |
| ZINC19096814 | -33.7556 |
| ZINC19096814 | -34.0578 |
| ZINC19107607 | -40.9289 |
| ZINC19133077 | -44.4157 |
| ZINC19133572 | -31.3672 |
| ZINC19148619 | -38.6282 |
| ZINC19169240 | -32.8859 |
| ZINC19169240 | -34.8996 |
| ZINC19170488 | -29.5699 |
| ZINC19170488 | -31.2196 |
| ZINC19170488 | -32.0371 |
| ZINC19170488 | -32.4487 |
| ZINC19171369 | -30.7961 |
| ZINC19216299 | -29.7528 |
| ZINC19216539 | -25.7036 |
| ZINC19220897 | -34.6253 |
| ZINC19220897 | -37.663  |
| ZINC19221382 | -39.9272 |
| ZINC19235862 | -28.3606 |
| ZINC19236699 | -30.4408 |
| ZINC19236699 | -36.8628 |
| ZINC19288275 | -42.6868 |
| ZINC19288275 | -46.2755 |
| ZINC19292330 | -26.0327 |
| ZINC19292330 | -31.2204 |
| ZINC19293231 | -37.9876 |
| ZINC19293570 | -51.9027 |
| ZINC19293782 | -40.2281 |
| ZINC19296183 | -28.3163 |
| ZINC19325006 | -34.363  |
| ZINC19328565 | -32.3957 |
| ZINC19328565 | -34.5632 |
| ZINC19328565 | -37.1515 |
| ZINC19329197 | -33.3766 |



|              |          |
|--------------|----------|
| ZINC19329197 | -34.0567 |
| ZINC19336397 | -34.7026 |
| ZINC19347807 | -39.0273 |
| ZINC19347807 | -39.1588 |
| ZINC19355010 | -32.5233 |
| ZINC19370011 | -32.2633 |
| ZINC19371559 | -31.7606 |
| ZINC19371559 | -34.5952 |
| ZINC19372431 | -39.1118 |
| ZINC19372431 | -42.9273 |
| ZINC19376237 | -45.6819 |
| ZINC19376237 | -50.0111 |
| ZINC19415127 | -39.0673 |
| ZINC19438790 | -37.4987 |
| ZINC19438790 | -41.481  |
| ZINC19440516 | -32.6091 |
| ZINC19440516 | -32.9984 |
| ZINC19446411 | -36.836  |
| ZINC19446411 | -43.5079 |
| ZINC19448522 | -31.6222 |
| ZINC19456189 | -25.2981 |
| ZINC19456189 | -27.4907 |
| ZINC19456189 | -30.2466 |
| ZINC19476016 | -26.1165 |
| ZINC19485788 | -33.9895 |
| ZINC19495851 | -44.0632 |
| ZINC19496792 | -39.6804 |
| ZINC19496808 | -34.7089 |
| ZINC19496808 | -40.7516 |
| ZINC19497594 | -25.0002 |
| ZINC19497594 | -32.9703 |
| ZINC19499625 | -37.2595 |
| ZINC19517376 | -32.215  |
| ZINC19520761 | -31.8309 |
| ZINC19526477 | -37.6862 |
| ZINC19527990 | -37.2329 |
| ZINC19530803 | -45.6039 |
| ZINC19530803 | -46.524  |
| ZINC19530803 | -46.99   |
| ZINC19532689 | -44.2042 |
| ZINC19534950 | -32.0251 |
| ZINC19535286 | -54.4355 |
| ZINC19536644 | -29.3553 |
| ZINC19549428 | -27.0521 |

|              |          |
|--------------|----------|
| ZINC19549428 | -31.5966 |
| ZINC19549787 | -18.7574 |
| ZINC19549787 | -23.6104 |
| ZINC19549787 | -28.3186 |
| ZINC19550143 | -33.1978 |
| ZINC19554376 | -44.0826 |
| ZINC19560893 | -40.0517 |
| ZINC19561057 | -39.2612 |
| ZINC19564867 | -35.4908 |
| ZINC19568213 | -35.3314 |
| ZINC19570035 | -49.0648 |
| ZINC19570035 | -57.9412 |
| ZINC19571022 | -39.0761 |
| ZINC19577926 | -32.0469 |
| ZINC19581269 | -36.8833 |
| ZINC19581359 | -42.184  |
| ZINC19581359 | -47.4226 |
| ZINC19582756 | -37.5726 |
| ZINC19586511 | -34.6492 |
| ZINC19592420 | -25.3706 |
| ZINC19592420 | -29.6301 |
| ZINC19593740 | -35.4283 |
| ZINC19593740 | -38.2797 |
| ZINC19593751 | -53.2953 |
| ZINC19594358 | -49.2602 |
| ZINC19594358 | -49.3156 |
| ZINC19594358 | -49.3886 |
| ZINC19594655 | -33.5324 |
| ZINC19594864 | -36.8142 |
| ZINC19595007 | -34.6415 |
| ZINC19595007 | -45.859  |
| ZINC19658614 | -31.3328 |
| ZINC19659476 | -37.1287 |
| ZINC19659476 | -41.073  |
| ZINC19693943 | -32.2093 |
| ZINC19694330 | -34.3118 |
| ZINC19695381 | -36.0848 |
| ZINC19695381 | -38.8138 |
| ZINC19699408 | -32.0087 |
| ZINC19700765 | -35.7889 |
| ZINC19702066 | -25.155  |
| ZINC19703041 | -52.9986 |
| ZINC19703041 | -55.2294 |
| ZINC19710098 | -34.8343 |

|              |          |
|--------------|----------|
| ZINC19716680 | -47.2321 |
| ZINC19716816 | -29.127  |
| ZINC19716816 | -34.414  |
| ZINC19720676 | -32.972  |
| ZINC19720676 | -53.5386 |
| ZINC19732277 | -44.1838 |
| ZINC19735945 | -34.0955 |
| ZINC19736442 | -43.7714 |
| ZINC19738385 | -39.8121 |
| ZINC19746114 | -40.4003 |
| ZINC19746114 | -48.1482 |
| ZINC19746868 | -33.8914 |
| ZINC19747266 | -36.8434 |
| ZINC19756243 | -48.7736 |
| ZINC19765220 | -33.7386 |
| ZINC19765477 | -39.3801 |
| ZINC19765933 | -38.9388 |
| ZINC19766797 | -42.1912 |
| ZINC19766797 | -43.2003 |
| ZINC19766820 | -38.3876 |
| ZINC19771252 | -44.7112 |
| ZINC19774479 | -44.762  |
| ZINC19779371 | -34.8064 |
| ZINC19790755 | -45.5445 |
| ZINC19792805 | -44.4867 |
| ZINC19796890 | -26.107  |
| ZINC19796890 | -28.921  |
| ZINC19797003 | -31.7785 |
| ZINC19798186 | -41.442  |
| ZINC19798409 | -38.3677 |
| ZINC19798409 | -45.0408 |
| ZINC19798914 | -41.2843 |
| ZINC19798914 | -44.2797 |
| ZINC19800575 | -27.0235 |
| ZINC19801491 | -24.0492 |
| ZINC19802094 | -39.0348 |
| ZINC19808025 | -40.2852 |
| ZINC19808118 | -37.2956 |
| ZINC19809541 | -38.4312 |
| ZINC19809541 | -48.0768 |
| ZINC19815258 | -47.2333 |
| ZINC19815271 | -53.1537 |
| ZINC19819757 | -41.6545 |
| ZINC19821804 | -35.1154 |

|              |          |
|--------------|----------|
| ZINC19825581 | -46.315  |
| ZINC19825913 | -38.9426 |
| ZINC19831189 | -45.2734 |
| ZINC19831189 | -45.7644 |
| ZINC19831603 | -39.8045 |
| ZINC19834146 | -30.5442 |
| ZINC19834146 | -31.4125 |
| ZINC19835685 | -40.5924 |
| ZINC19838350 | -38.1307 |
| ZINC19840086 | -33.7669 |
| ZINC19840425 | -35.5072 |
| ZINC19844512 | -31.6079 |
| ZINC19844512 | -35.8977 |
| ZINC19845627 | -34.3239 |
| ZINC19851335 | -34.7385 |
| ZINC19852411 | -21.1218 |
| ZINC19852429 | -47.8138 |
| ZINC19853089 | -42.0121 |
| ZINC19855484 | -41.9015 |
| ZINC19855484 | -47.1724 |
| ZINC19863019 | -46.6896 |
| ZINC19863923 | -39.5326 |
| ZINC19866008 | -32.7197 |
| ZINC19872434 | -48.8179 |
| ZINC19874664 | -51.7376 |
| ZINC19879510 | -24.706  |
| ZINC19882609 | -27.5235 |
| ZINC19882609 | -40.6772 |
| ZINC19883586 | -32.6057 |
| ZINC19889426 | -32.9932 |
| ZINC19890602 | -48.9924 |
| ZINC19891250 | -40.8012 |
| ZINC19891459 | -36.5142 |
| ZINC19891653 | -31.4252 |
| ZINC19891653 | -34.9172 |
| ZINC19897843 | -33.9592 |
| ZINC19898932 | -36.0126 |
| ZINC19899798 | -41.5107 |
| ZINC19909211 | -48.036  |
| ZINC19910636 | -37.6299 |
| ZINC19912400 | -32.7756 |
| ZINC19927974 | -39.3593 |
| ZINC19938621 | -26.8783 |
| ZINC19948272 | -37.3085 |

|              |          |
|--------------|----------|
| ZINC19948532 | -41.4827 |
| ZINC19964436 | -36.7418 |
| ZINC19967897 | -34.6379 |
| ZINC19968783 | -33.5713 |
| ZINC19968783 | -35.3047 |
| ZINC19974057 | -39.6721 |
| ZINC19978525 | -46.3077 |
| ZINC20027284 | -39.732  |
| ZINC20028816 | -25.0515 |
| ZINC20045182 | -37.0929 |
| ZINC20054150 | -43.9434 |
| ZINC20056710 | -34.4243 |
| ZINC20058217 | -32.5232 |
| ZINC20068979 | -34.6512 |
| ZINC20069564 | -29.5088 |
| ZINC20070282 | -22.0273 |
| ZINC20070305 | -31.9778 |
| ZINC20077268 | -32.6443 |
| ZINC20077268 | -32.7056 |
| ZINC20080107 | -33.6305 |
| ZINC20082525 | -34.9138 |
| ZINC20082525 | -35.608  |
| ZINC20083660 | -27.3487 |
| ZINC20083660 | -35.0149 |
| ZINC20086390 | -37.9193 |
| ZINC20094949 | -36.6797 |
| ZINC20112893 | -39.2673 |
| ZINC20114235 | -29.2178 |
| ZINC20121515 | -34.4325 |
| ZINC20122069 | -35.9231 |
| ZINC20122069 | -35.9936 |
| ZINC20122753 | -36.248  |
| ZINC20130193 | -38.3895 |
| ZINC20130299 | -31.8487 |
| ZINC20130299 | -32.0388 |
| ZINC20135457 | -45.0054 |
| ZINC20135474 | -35.3492 |
| ZINC20136513 | -36.1984 |
| ZINC20137624 | -42.0092 |
| ZINC20140673 | -38.0055 |
| ZINC20141625 | -44.1372 |
| ZINC20142367 | -42.3957 |
| ZINC20142834 | -39.2074 |
| ZINC20144643 | -47.8872 |

|              |          |
|--------------|----------|
| ZINC20145174 | -45.9365 |
| ZINC20146456 | -43.8121 |
| ZINC20149543 | -33.7177 |
| ZINC20150803 | -26.3281 |
| ZINC20150803 | -26.3578 |
| ZINC20152546 | -48.8598 |
| ZINC20158318 | -47.8499 |
| ZINC20176536 | -35.8303 |
| ZINC20176536 | -36.9385 |
| ZINC20177672 | -27.06   |
| ZINC20192742 | -31.2164 |
| ZINC20192742 | -36.9348 |
| ZINC20209411 | -45.0548 |
| ZINC20217350 | -28.373  |
| ZINC20220132 | -35.4152 |
| ZINC20220132 | -38.5084 |
| ZINC20238120 | -44.0961 |
| ZINC20246277 | -52.3281 |
| ZINC20247307 | -25.1618 |
| ZINC20247448 | -35.9732 |
| ZINC20254864 | -33.8219 |
| ZINC20254864 | -37.182  |
| ZINC20274795 | -35.3788 |
| ZINC20275178 | -45.0422 |
| ZINC20282680 | -31.8289 |
| ZINC20285801 | -37.0828 |
| ZINC20290574 | -36.2104 |
| ZINC20298567 | -39.8157 |
| ZINC20302757 | -39.1538 |
| ZINC20308213 | -31.512  |
| ZINC20308216 | -31.7133 |
| ZINC20308895 | -30.7713 |
| ZINC20311052 | -39.1782 |
| ZINC20311067 | -41.4841 |
| ZINC20315544 | -24.0601 |
| ZINC20318515 | -38.7745 |
| ZINC20318515 | -41.9868 |
| ZINC20319186 | -50.9506 |
| ZINC20327777 | -30.5591 |
| ZINC20353529 | -38.9402 |
| ZINC20357500 | -26.8524 |
| ZINC20357637 | -33.2043 |
| ZINC20357809 | -22.9702 |
| ZINC20357809 | -31.8951 |

|              |          |
|--------------|----------|
| ZINC20357900 | -36.6377 |
| ZINC20358830 | -39.3115 |
| ZINC20360366 | -35.5878 |
| ZINC20366272 | -28.8905 |
| ZINC20366451 | -32.6657 |
| ZINC20367490 | -32.7465 |
| ZINC20374483 | -30.9164 |
| ZINC20374483 | -35.5484 |
| ZINC20374483 | -44.6377 |
| ZINC20374736 | -40.5736 |
| ZINC20374736 | -41.0972 |
| ZINC20375383 | -36.1779 |
| ZINC20375580 | -32.3553 |
| ZINC20381639 | -30.6796 |
| ZINC20389667 | -34.6413 |
| ZINC20392089 | -29.198  |
| ZINC20392435 | -32.8536 |
| ZINC20392494 | -27.6974 |
| ZINC20392728 | -43.3718 |
| ZINC20393771 | -37.135  |
| ZINC20393771 | -43.1596 |
| ZINC20404824 | -47.1586 |
| ZINC20405413 | -36.1309 |
| ZINC20413592 | -42.178  |
| ZINC20416480 | -35.3157 |
| ZINC20421525 | -50.542  |
| ZINC20421586 | -37.9417 |
| ZINC20421741 | -36.2895 |
| ZINC20426427 | -37.3088 |
| ZINC20427081 | -41.7394 |
| ZINC20427387 | -45.0145 |
| ZINC20436262 | -40.0733 |
| ZINC20436387 | -46.1201 |
| ZINC20436387 | -47.5403 |
| ZINC20444015 | -28.0891 |
| ZINC20448479 | -41.8659 |
| ZINC20453122 | -37.1542 |
| ZINC20454456 | -45.8185 |
| ZINC20455778 | -32.9969 |
| ZINC20455778 | -35.0146 |
| ZINC20463313 | -40.266  |
| ZINC20463423 | -46.0916 |
| ZINC20467633 | -47.1632 |
| ZINC20468909 | -28.3007 |

|              |          |
|--------------|----------|
| ZINC20477937 | -30.5632 |
| ZINC20486871 | -43.6866 |
| ZINC20492256 | -34.8375 |
| ZINC20492268 | -33.3275 |
| ZINC20496469 | -45.7142 |
| ZINC20503372 | -36.9824 |
| ZINC20506843 | -30.3881 |
| ZINC20508051 | -38.3896 |
| ZINC20512198 | -38.7377 |
| ZINC20514886 | -38.5656 |
| ZINC20528421 | -46.2157 |
| ZINC20528724 | -45.3909 |
| ZINC20535550 | -34.8651 |
| ZINC20535550 | -37.5385 |
| ZINC20538801 | -35.02   |
| ZINC20538801 | -37.486  |
| ZINC20541102 | -36.4048 |
| ZINC20541841 | -36.8525 |
| ZINC20541841 | -40.4752 |
| ZINC20544028 | -34.63   |
| ZINC20544028 | -35.784  |
| ZINC20547866 | -38.911  |
| ZINC20556074 | -28.2753 |
| ZINC20556074 | -34.3704 |
| ZINC20561747 | -37.8622 |
| ZINC20566279 | -24.4457 |
| ZINC20566279 | -30.6621 |
| ZINC20566419 | -36.988  |
| ZINC20567672 | -30.158  |
| ZINC20567815 | -35.9315 |
| ZINC20572322 | -33.6603 |
| ZINC20572498 | -30.4995 |
| ZINC20575554 | -52.0728 |
| ZINC20587722 | -43.9121 |
| ZINC20588752 | -33.5922 |
| ZINC20588752 | -33.7196 |
| ZINC20588752 | -44.3225 |
| ZINC20591998 | -34.1665 |
| ZINC20595299 | -27.5474 |
| ZINC20595299 | -36.753  |
| ZINC20600101 | -40.4582 |
| ZINC20601233 | -35.6341 |
| ZINC20601233 | -43.3978 |
| ZINC20601378 | -36.4376 |



|              |          |
|--------------|----------|
| ZINC20602137 | -43.4693 |
| ZINC20602738 | -48.4476 |
| ZINC20606245 | -42.4461 |
| ZINC20608180 | -38.9982 |
| ZINC20613078 | -36.0668 |
| ZINC20614332 | -43.6068 |
| ZINC20614332 | -45.1771 |
| ZINC20618018 | -36.8918 |
| ZINC20618247 | -46.4359 |
| ZINC20618477 | -28.6499 |
| ZINC20624371 | -34.3225 |
| ZINC20628151 | -50.7516 |
| ZINC20628151 | -51.5187 |
| ZINC20648371 | -57.7909 |
| ZINC20650714 | -54.2356 |
| ZINC20675310 | -37.2    |
| ZINC20675310 | -45.701  |
| ZINC20679803 | -29.1985 |
| ZINC20680222 | -37.7562 |
| ZINC20686099 | -29.1413 |
| ZINC20687282 | -34.7954 |
| ZINC20693707 | -24.6567 |
| ZINC20694019 | -43.7026 |
| ZINC20695696 | -37.2294 |
| ZINC20702515 | -33.2922 |
| ZINC20707254 | -34.5187 |
| ZINC20709050 | -27.8266 |
| ZINC20709050 | -27.9474 |
| ZINC20709707 | -28.3646 |
| ZINC20709707 | -35.0745 |
| ZINC20715095 | -38.8372 |
| ZINC20715095 | -39.2406 |
| ZINC20715095 | -40.1831 |
| ZINC20718308 | -29.5418 |
| ZINC20718523 | -31.2484 |
| ZINC20728305 | -28.8012 |
| ZINC20728305 | -29.8806 |
| ZINC20738936 | -49.3681 |
| ZINC20739241 | -47.1558 |
| ZINC20739813 | -46.1414 |
| ZINC20748434 | -25.9301 |
| ZINC20754518 | -28.658  |
| ZINC20755881 | -31.6774 |
| ZINC20757990 | -37.6166 |

|              |          |
|--------------|----------|
| ZINC20758460 | -46.6243 |
| ZINC20758763 | -28.2679 |
| ZINC20764672 | -26.118  |
| ZINC20799905 | -35.4071 |
| ZINC20799905 | -39.393  |
| ZINC20808341 | -25.8474 |
| ZINC20813457 | -29.161  |
| ZINC20816069 | -40.2408 |
| ZINC20820844 | -36.1952 |
| ZINC20820844 | -39.8314 |
| ZINC20828186 | -44.4774 |
| ZINC20854988 | -31.5524 |
| ZINC20861485 | -35.6639 |
| ZINC20869270 | -37.1725 |
| ZINC20869270 | -41.5938 |
| ZINC20893896 | -29.0518 |
| ZINC20893947 | -30.3063 |
| ZINC20899247 | -2.30923 |
| ZINC20904273 | -30.3048 |
| ZINC20906933 | -45.9999 |
| ZINC20918731 | -41.6315 |
| ZINC20920744 | -50.259  |
| ZINC20921571 | -42.8164 |
| ZINC20950503 | -43.0577 |
| ZINC20973062 | -47.2428 |
| ZINC20979483 | -45.4386 |
| ZINC20989025 | -35.1072 |
| ZINC20990331 | -36.5178 |
| ZINC20994168 | -45.9896 |
| ZINC21014140 | -29.2824 |
| ZINC21014140 | -35.8389 |
| ZINC21016928 | -43.3396 |
| ZINC21020189 | -40.2327 |
| ZINC21020506 | -38.3051 |
| ZINC21108012 | -38.5765 |
| ZINC21115045 | -43.1145 |
| ZINC21127390 | -47.3743 |
| ZINC21136429 | -40.3742 |
| ZINC21141595 | -42.099  |
| ZINC21146048 | -45.5113 |
| ZINC21168089 | -30.9952 |
| ZINC21168089 | -46.4891 |
| ZINC21175135 | -40.2448 |
| ZINC21175135 | -42.8159 |

|              |          |
|--------------|----------|
| ZINC21175981 | -19.2476 |
| ZINC21186817 | -34.1125 |
| ZINC21219923 | -35.7195 |
| ZINC21228399 | -44.1122 |
| ZINC21235196 | -53.1877 |
| ZINC21242966 | -37.516  |
| ZINC21243314 | -46.7391 |
| ZINC21259496 | -45.0486 |
| ZINC21331680 | -39.8559 |
| ZINC21344464 | -38.4271 |
| ZINC21344464 | -45.0396 |
| ZINC21359503 | -35.6408 |
| ZINC21424596 | -34.4988 |
| ZINC21508381 | -34.5156 |
| ZINC21577174 | -40.6621 |
| ZINC21584400 | -36.602  |
| ZINC21584400 | -40.3604 |
| ZINC21586887 | -39.7469 |
| ZINC21587770 | -38.0461 |
| ZINC21620515 | -39.4712 |
| ZINC21652816 | -41.5556 |
| ZINC21652816 | -50.2518 |
| ZINC21653024 | -34.2863 |
| ZINC21660479 | -25.2701 |
| ZINC21684694 | -45.2425 |
| ZINC21695634 | -38.3491 |
| ZINC21728080 | -38.074  |
| ZINC21732937 | -39.484  |
| ZINC21753451 | -20.1428 |
| ZINC21774145 | -43.3238 |
| ZINC21780212 | -49.1555 |
| ZINC21797257 | -36.0324 |
| ZINC21799335 | -32.0579 |
| ZINC21810903 | -33.4236 |
| ZINC21811013 | -25.855  |
| ZINC21821395 | -39.4792 |
| ZINC21839436 | -40.6719 |
| ZINC21846951 | -35.1983 |
| ZINC21868339 | -35.2058 |
| ZINC21872587 | -37.2752 |
| ZINC21873232 | -29.3672 |
| ZINC21877675 | -35.9247 |
| ZINC21896877 | -43.9131 |
| ZINC21915738 | -45.6001 |

|              |          |
|--------------|----------|
| ZINC21916322 | -44.6119 |
| ZINC21928156 | -46.2379 |
| ZINC21929663 | -45.164  |
| ZINC21929663 | -46.114  |
| ZINC21935426 | -55.3108 |
| ZINC21945591 | -41.1272 |
| ZINC21956734 | -44.5116 |
| ZINC21967269 | -39.6334 |
| ZINC21980865 | -41.9806 |
| ZINC21985475 | -27.0034 |
| ZINC22016968 | -39.7338 |
| ZINC22016968 | -42.0571 |
| ZINC22018280 | -30.5608 |
| ZINC22023231 | -43.2509 |
| ZINC22024406 | -38.62   |
| ZINC22024406 | -41.5067 |
| ZINC22028422 | -32.5038 |
| ZINC22028422 | -41.9814 |
| ZINC22038956 | -45.9595 |
| ZINC22048543 | -25.9304 |
| ZINC22048543 | -27.771  |
| ZINC22061647 | -37.7024 |
| ZINC22061976 | -27.3384 |
| ZINC22069708 | -34.3537 |
| ZINC22069708 | -35.5332 |
| ZINC22096231 | -32.4638 |
| ZINC22096231 | -38.468  |
| ZINC22126465 | -31.9053 |
| ZINC22135465 | -39.3227 |
| ZINC22139089 | -51.3118 |
| ZINC22200245 | -39.8402 |
| ZINC22205933 | -40.1753 |
| ZINC22233754 | -41.226  |
| ZINC22239200 | -38.7542 |
| ZINC22239297 | -34.1292 |
| ZINC22240010 | -43.668  |
| ZINC22262532 | -39.1957 |
| ZINC22262532 | -45.5962 |
| ZINC22262532 | -45.7115 |
| ZINC22263832 | -37.692  |
| ZINC22263832 | -37.9498 |
| ZINC22264639 | -42.2204 |
| ZINC22264639 | -42.7543 |
| ZINC22266651 | -28.0857 |

|              |          |
|--------------|----------|
| ZINC22279681 | -39.7063 |
| ZINC22370812 | -41.6614 |
| ZINC22375385 | -34.4894 |
| ZINC22375385 | -40.7698 |
| ZINC22418773 | -43.2861 |
| ZINC22424713 | -37.0406 |
| ZINC22424713 | -39.1284 |
| ZINC22440330 | -37.7765 |
| ZINC22505072 | -38.9514 |
| ZINC22506638 | -36.5898 |
| ZINC22516718 | -33.9227 |
| ZINC22585585 | -40.132  |
| ZINC22589299 | -39.8244 |
| ZINC22606923 | -41.3963 |
| ZINC22606923 | -44.2815 |
| ZINC22606948 | -38.4914 |
| ZINC22608562 | -30.7601 |
| ZINC22608965 | -35.8819 |
| ZINC22609202 | -31.2292 |
| ZINC22609202 | -39.8769 |
| ZINC22611045 | -41.9344 |
| ZINC22618807 | -41.8251 |
| ZINC22688959 | -25.9758 |
| ZINC22690962 | -26.6201 |
| ZINC22697485 | -30.4103 |
| ZINC22698285 | -34.4629 |
| ZINC22698285 | -36.068  |
| ZINC22726587 | -39.5525 |
| ZINC22726587 | -42.5836 |
| ZINC22734482 | -30.2758 |
| ZINC22734482 | -32.2431 |
| ZINC22734482 | -38.9564 |
| ZINC22734497 | -28.1485 |
| ZINC22734497 | -29.5136 |
| ZINC22738414 | -47.8015 |
| ZINC22753981 | -36.2045 |
| ZINC22771422 | -34.9915 |
| ZINC22771422 | -35.1444 |
| ZINC22773299 | -32.6807 |
| ZINC22776889 | -39.4995 |
| ZINC22785803 | -33.8677 |
| ZINC22788075 | -32.489  |
| ZINC22788878 | -28.7438 |
| ZINC22791668 | -36.97   |

|              |          |
|--------------|----------|
| ZINC22792671 | -38.9751 |
| ZINC22793644 | -31.1811 |
| ZINC22793644 | -38.0948 |
| ZINC22794439 | -31.8012 |
| ZINC22794439 | -49.3646 |
| ZINC22794439 | -52.8626 |
| ZINC22796199 | -39.9153 |
| ZINC22796199 | -40.979  |
| ZINC22800472 | -29.6774 |
| ZINC22800472 | -34.4651 |
| ZINC22804449 | -34.6436 |
| ZINC22804449 | -45.1001 |
| ZINC22831839 | -40.6716 |
| ZINC22832717 | -38.6935 |
| ZINC22836041 | -39.4298 |
| ZINC22851596 | -31.8736 |
| ZINC22858889 | -28.7698 |
| ZINC22863760 | -35.5369 |
| ZINC22866048 | -47.1091 |
| ZINC22868399 | -30.6805 |
| ZINC22881478 | -34.1897 |
| ZINC22887176 | -31.5474 |
| ZINC22902503 | -30.0458 |
| ZINC22902548 | -43.2465 |
| ZINC22909957 | -30.7666 |
| ZINC22909957 | -33.5    |
| ZINC22912882 | -50.4357 |
| ZINC22914973 | -33.2128 |
| ZINC22914973 | -40.1045 |
| ZINC22917591 | -50.1766 |
| ZINC22926488 | -34.1491 |
| ZINC22926488 | -34.6184 |
| ZINC22943476 | -37.8201 |
| ZINC22993288 | -33.7718 |
| ZINC22993288 | -38.7638 |
| ZINC22995914 | -33.3443 |
| ZINC22996805 | -41.5834 |
| ZINC23020527 | -51.0796 |
| ZINC23022754 | -36.1836 |
| ZINC23022754 | -37.7672 |
| ZINC23024606 | -40.2787 |
| ZINC23041616 | -43.0185 |
| ZINC23054300 | -35.2962 |
| ZINC23073543 | -50.9152 |

|              |          |
|--------------|----------|
| ZINC23080368 | -32.3224 |
| ZINC23101310 | -39.7556 |
| ZINC23101310 | -43.0827 |
| ZINC23114836 | -33.5719 |
| ZINC23119133 | -37.0442 |
| ZINC23119740 | -40.785  |
| ZINC23119740 | -41.0967 |
| ZINC23119740 | -43.1843 |
| ZINC23129055 | -36.9667 |
| ZINC23131201 | -39.9434 |
| ZINC23139350 | -35.1096 |
| ZINC23140044 | -42.39   |
| ZINC23141039 | -40.7503 |
| ZINC23141039 | -43.9541 |
| ZINC23143647 | -43.1894 |
| ZINC23162572 | -41.9204 |
| ZINC23188299 | -47.1302 |
| ZINC23198250 | -40.4091 |
| ZINC23212067 | -37.2475 |
| ZINC23212067 | -45.845  |
| ZINC23212067 | -47.7537 |
| ZINC23231473 | -30.5421 |
| ZINC23231473 | -37.3792 |
| ZINC23232023 | -27.5628 |
| ZINC23239174 | -29.3158 |
| ZINC23240651 | -49.1628 |
| ZINC23241800 | -50.3096 |
| ZINC23241876 | -43.0314 |
| ZINC23248885 | -40.6536 |
| ZINC23253444 | -38.2643 |
| ZINC23262991 | -38.5327 |
| ZINC23281562 | -32.1625 |
| ZINC23281562 | -36.3808 |
| ZINC23286608 | -36.9418 |
| ZINC23363280 | -39.061  |
| ZINC23363280 | -46.5342 |
| ZINC23369034 | -44.0817 |
| ZINC23369034 | -57.9604 |
| ZINC23375071 | -44.0427 |
| ZINC23379776 | -35.3566 |
| ZINC23386784 | -40.3021 |
| ZINC23389910 | -51.2813 |
| ZINC23409854 | -39.3531 |
| ZINC23409854 | -41.4779 |

|              |          |
|--------------|----------|
| ZINC23430056 | -33.1468 |
| ZINC23430809 | -35.3025 |
| ZINC23486534 | -45.3398 |
| ZINC23492464 | -38.3242 |
| ZINC23495794 | -36.5651 |
| ZINC23509017 | -35.6988 |
| ZINC23509017 | -38.4373 |
| ZINC23540871 | -30.4253 |
| ZINC23550103 | -39.4018 |
| ZINC23625866 | -38.7468 |
| ZINC23625866 | -47.008  |
| ZINC23643897 | -40.3244 |
| ZINC23648919 | -37.3307 |
| ZINC23653758 | -46.1795 |
| ZINC23653758 | -50.9865 |
| ZINC23692316 | -45.2458 |
| ZINC23712292 | -39.2519 |
| ZINC23717835 | -40.4913 |
| ZINC23724608 | -41.0855 |
| ZINC23732729 | -42.1924 |
| ZINC23751089 | -40.5104 |
| ZINC23761213 | -40.7926 |
| ZINC23825120 | -38.0869 |
| ZINC23846512 | -35.6089 |
| ZINC23846974 | -30.5486 |
| ZINC23847493 | -36.1633 |
| ZINC23847493 | -36.8709 |
| ZINC23862386 | -35.033  |
| ZINC23894924 | -47.7976 |
| ZINC23954682 | -37.2161 |
| ZINC23968236 | -33.2033 |
| ZINC23975568 | -31.9873 |
| ZINC23994273 | -35.3568 |
| ZINC23996002 | -39.0763 |
| ZINC23996002 | -40.9041 |
| ZINC24039729 | -38.6772 |
| ZINC24044831 | -38.9823 |
| ZINC24058166 | -36.788  |
| ZINC24113240 | -26.3234 |
| ZINC24113240 | -41.8316 |
| ZINC24147530 | -32.1762 |
| ZINC24147607 | -34.7017 |
| ZINC24193350 | -34.6338 |
| ZINC24203780 | -29.4903 |



|              |          |
|--------------|----------|
| ZINC24228110 | -27.7433 |
| ZINC24236107 | -46.416  |
| ZINC24261475 | -37.5084 |
| ZINC24315957 | -34.6724 |
| ZINC24392131 | -41.2309 |
| ZINC24429288 | -42.9818 |
| ZINC24444833 | -43.367  |
| ZINC24451298 | -44.5632 |
| ZINC24451298 | -52.8101 |
| ZINC24467475 | -36.68   |
| ZINC24480559 | -45.9857 |
| ZINC24481795 | -42.0494 |
| ZINC24504296 | -29.5551 |
| ZINC24510304 | -32.0987 |
| ZINC24514037 | -38.961  |
| ZINC24527598 | -30.9933 |
| ZINC24527598 | -36.342  |
| ZINC24529112 | -37.3692 |
| ZINC24549208 | -31.182  |
| ZINC24622385 | -35.0798 |
| ZINC24622385 | -40.9947 |
| ZINC24634690 | -44.9142 |
| ZINC24666610 | -37.3836 |
| ZINC24666610 | -43.7471 |
| ZINC24696758 | -39.1173 |
| ZINC24717381 | -30.32   |
| ZINC24719262 | -41.3504 |
| ZINC24792709 | -45.0625 |
| ZINC24813522 | -48.1635 |
| ZINC24813522 | -50.7914 |
| ZINC24828249 | -45.6716 |
| ZINC24828432 | -44.4151 |
| ZINC24828432 | -47.4524 |
| ZINC24843342 | -36.4533 |
| ZINC24871577 | -28.105  |
| ZINC24871577 | -43.9166 |
| ZINC24878645 | -38.581  |
| ZINC24878645 | -38.7425 |
| ZINC24880051 | -41.6306 |
| ZINC24888080 | -37.3606 |
| ZINC24897399 | -37.4032 |
| ZINC24897399 | -43.9121 |
| ZINC24899249 | -37.9186 |
| ZINC24899249 | -39.4079 |

|              |          |
|--------------|----------|
| ZINC24900103 | -31.5666 |
| ZINC24900103 | -40.0317 |
| ZINC24906019 | -40.2824 |
| ZINC24906019 | -40.4325 |
| ZINC24950944 | -43.8729 |
| ZINC24962252 | -49.5648 |
| ZINC24978661 | -39.4278 |
| ZINC24979780 | -42.4015 |
| ZINC24986424 | -39.8336 |
| ZINC25012121 | -40.9132 |
| ZINC25038461 | -43.7832 |
| ZINC25039981 | -47.8702 |
| ZINC25046544 | -40.9632 |
| ZINC25048376 | -42.7835 |
| ZINC25064472 | -43.7113 |
| ZINC25064472 | -46.2776 |
| ZINC25108749 | -46.5635 |
| ZINC25113348 | -38.9679 |
| ZINC25113348 | -42.6427 |
| ZINC25140532 | -35.839  |
| ZINC25233946 | -41.6443 |
| ZINC25233946 | -45.8507 |
| ZINC25248625 | -39.9045 |
| ZINC25248625 | -45.8431 |
| ZINC25251281 | -48.965  |
| ZINC25266583 | -38.3805 |
| ZINC25285214 | -44.0761 |
| ZINC25309382 | -41.0123 |
| ZINC25316703 | -41.5359 |
| ZINC25316703 | -41.9142 |
| ZINC25321329 | -51.8636 |
| ZINC25322049 | -42.2557 |
| ZINC25326035 | -35.7726 |
| ZINC25330519 | -38.3719 |
| ZINC25347853 | -43.0297 |
| ZINC25347853 | -49.1622 |
| ZINC25381751 | -40.8047 |
| ZINC25399370 | -35.29   |
| ZINC25399370 | -44.1747 |
| ZINC25410483 | -46.0314 |
| ZINC25432178 | -34.6355 |
| ZINC25438167 | -38.678  |
| ZINC25452923 | -37.1231 |
| ZINC25460951 | -33.2889 |

|              |          |
|--------------|----------|
| ZINC25460951 | -35.9453 |
| ZINC25497834 | -51.4212 |
| ZINC25498318 | -32.9955 |
| ZINC25499512 | -37.62   |
| ZINC25502685 | -49.9612 |
| ZINC25518518 | -36.9261 |
| ZINC25538489 | -43.0799 |
| ZINC25549684 | -45.617  |
| ZINC25559380 | -38.6746 |
| ZINC25574105 | -43.8722 |
| ZINC25579875 | -40.3934 |
| ZINC25579875 | -41.3482 |
| ZINC25694763 | -34.9255 |
| ZINC25713189 | -41.696  |
| ZINC25741555 | -38.3322 |
| ZINC25766818 | -43.8288 |
| ZINC25776817 | -39.6955 |
| ZINC25778684 | -34.9104 |
| ZINC25798256 | -44.6207 |
| ZINC25831044 | -43.7161 |
| ZINC25831044 | -50.1068 |
| ZINC25875822 | -40.1203 |
| ZINC25893643 | -35.963  |
| ZINC25925704 | -36.3483 |
| ZINC25943355 | -31.1588 |
| ZINC25943355 | -41.0414 |
| ZINC25946651 | -34.8568 |
| ZINC25946651 | -41.9551 |
| ZINC25968031 | -44.9713 |
| ZINC26038406 | -49.5352 |
| ZINC26064700 | -48.1915 |
| ZINC26083220 | -36.2245 |
| ZINC26083220 | -41.6864 |
| ZINC26144304 | -41.492  |
| ZINC26242021 | -38.2548 |
| ZINC26263007 | -43.5134 |
| ZINC26263007 | -47.8749 |
| ZINC26338475 | -45.6678 |
| ZINC26360063 | -49.3186 |
| ZINC26361634 | -34.6187 |
| ZINC26390117 | -46.705  |
| ZINC26423644 | -26.9573 |
| ZINC26440861 | -43.6713 |
| ZINC26461454 | -39.7087 |

|              |          |
|--------------|----------|
| ZINC26476816 | -42.4154 |
| ZINC26506737 | -23.5266 |
| ZINC26506737 | -27.6425 |
| ZINC26513748 | -34.0714 |
| ZINC26513748 | -37.3462 |
| ZINC26514546 | -30.2943 |
| ZINC26537479 | -35.0647 |
| ZINC26540064 | -38.5218 |
| ZINC26569183 | -37.522  |
| ZINC26569183 | -41.331  |
| ZINC26569183 | -44.9955 |
| ZINC26633694 | -29.6677 |
| ZINC26658959 | -26.9544 |
| ZINC26658959 | -39.4332 |
| ZINC26783901 | -40.4681 |
| ZINC26837715 | -36.9813 |
| ZINC26875150 | -38.6441 |
| ZINC26905080 | -36.699  |
| ZINC26918894 | -39.5875 |
| ZINC26919984 | -41.4863 |
| ZINC26953718 | -34.7717 |
| ZINC26993335 | -37.3324 |
| ZINC27058286 | -33.1335 |
| ZINC27139347 | -34.4444 |
| ZINC27154131 | -36.9382 |
| ZINC27203424 | -37.6852 |
| ZINC27232874 | -34.5153 |
| ZINC27317725 | -37.1989 |
| ZINC27333738 | -38.5958 |
| ZINC27344487 | -43.9163 |
| ZINC27366061 | -42.634  |
| ZINC27401351 | -45.6772 |
| ZINC27416745 | -42.289  |
| ZINC27460656 | -31.1429 |
| ZINC27496296 | -36.8161 |
| ZINC27503657 | -40.0113 |
| ZINC27527730 | -41.8117 |
| ZINC27527775 | -39.9521 |
| ZINC27534022 | -44.2339 |
| ZINC27543242 | -44.2686 |
| ZINC27543338 | -48.5321 |
| ZINC27544355 | -36.1146 |
| ZINC27561337 | -36.7883 |
| ZINC27570758 | -39.5889 |

|              |          |
|--------------|----------|
| ZINC27572151 | -48.2079 |
| ZINC27577751 | -41.7252 |
| ZINC27577991 | -34.5959 |
| ZINC27587506 | -32.0558 |
| ZINC27633639 | -49.0209 |
| ZINC27666754 | -42.8073 |
| ZINC27736193 | -39.2342 |
| ZINC27736193 | -45.5272 |
| ZINC27764364 | -36.5459 |
| ZINC27777701 | -38.3617 |
| ZINC27795661 | -41.5073 |
| ZINC27824090 | -30.7843 |
| ZINC27829423 | -37.3701 |
| ZINC27871415 | -41.4544 |
| ZINC27908761 | -38.1777 |
| ZINC27915328 | -37.5304 |
| ZINC27965500 | -27.0124 |
| ZINC27965500 | -27.4596 |
| ZINC27968816 | -40.7312 |
| ZINC27968816 | -41.217  |
| ZINC27980689 | -36.7748 |
| ZINC27983962 | -46.3683 |
| ZINC27986810 | -29.3952 |
| ZINC28016208 | -43.8203 |
| ZINC28016208 | -47.8269 |
| ZINC28021874 | -37.7553 |
| ZINC28039403 | -39.3558 |
| ZINC28189210 | -30.8199 |
| ZINC28194597 | -37.6206 |
| ZINC28196918 | -37.9141 |
| ZINC28196918 | -41.4586 |
| ZINC28221866 | -46.911  |
| ZINC28224079 | -39.8657 |
| ZINC28230082 | -41.0312 |
| ZINC28251097 | -36.0248 |
| ZINC28254760 | -41.8437 |
| ZINC28273313 | -41.9518 |
| ZINC28283966 | -38.8484 |
| ZINC28296883 | -40.9245 |
| ZINC28307186 | -39.5737 |
| ZINC28369751 | -31.6149 |
| ZINC28384022 | -39.0566 |
| ZINC28417342 | -50.717  |
| ZINC28417766 | -41.0348 |

|              |          |
|--------------|----------|
| ZINC28417766 | -43.9844 |
| ZINC28449820 | -50.0323 |
| ZINC28465767 | -32.181  |
| ZINC28483353 | -35.5063 |
| ZINC28575632 | -50.5914 |
| ZINC28620907 | -42.3939 |
| ZINC28620907 | -50.5864 |
| ZINC28629033 | -49.3961 |
| ZINC28634794 | -42.3145 |
| ZINC28645237 | -45.304  |
| ZINC28785019 | -34.133  |
| ZINC28817789 | -47.2659 |
| ZINC28835616 | -47.0918 |
| ZINC28835616 | -55.9668 |
| ZINC28843147 | -27.4472 |
| ZINC28924179 | -25.434  |
| ZINC28994178 | -46.3211 |
| ZINC29242906 | -42.1431 |
| ZINC29287901 | -38.7646 |
| ZINC29335388 | -43.2119 |
| ZINC29342145 | -39.4137 |
| ZINC29378325 | -38.3628 |
| ZINC29379343 | -38.7611 |
| ZINC29386605 | -36.0532 |
| ZINC29391386 | -40.8902 |
| ZINC29413706 | -32.4961 |
| ZINC29433777 | -36.9129 |
| ZINC29459734 | -36.5186 |
| ZINC29466376 | -36.4185 |
| ZINC29490753 | -37.3603 |
| ZINC29505803 | -40.0173 |
| ZINC29505803 | -43.4973 |
| ZINC29525774 | -47.514  |
| ZINC29525774 | -48.1136 |
| ZINC29576831 | -33.4028 |
| ZINC29645640 | -22.7714 |
| ZINC29674222 | -41.1176 |
| ZINC29723878 | -37.2372 |
| ZINC29736721 | -46.0736 |
| ZINC29736721 | -54.307  |
| ZINC29751042 | -38.8356 |
| ZINC29780359 | -38.8913 |
| ZINC29785995 | -37.2041 |
| ZINC29785995 | -38.0337 |

|              |          |
|--------------|----------|
| ZINC29831565 | -30.3873 |
| ZINC29831565 | -32.8954 |
| ZINC29860374 | -44.658  |
| ZINC29866932 | -37.7254 |
| ZINC29874707 | -48.0912 |
| ZINC29903694 | -39.7313 |
| ZINC29934515 | -36.5873 |
| ZINC29953636 | -35.1447 |
| ZINC29953636 | -40.2367 |
| ZINC29963792 | -44.4257 |
| ZINC29973022 | -34.2649 |
| ZINC29973022 | -35.5225 |
| ZINC29979118 | -36.9027 |
| ZINC29979118 | -44.5073 |
| ZINC30034766 | -31.9452 |
| ZINC30034766 | -32.3349 |
| ZINC30119879 | -41.61   |
| ZINC30119879 | -41.6101 |
| ZINC30127664 | -36.6081 |
| ZINC30128460 | -36.5336 |
| ZINC30132732 | -37.2573 |
| ZINC30147556 | -36.7198 |
| ZINC30204055 | -46.6319 |
| ZINC30287864 | -40.1916 |
| ZINC30476173 | -50.4708 |
| ZINC30516341 | -42.8271 |
| ZINC30516341 | -47.6572 |
| ZINC30522562 | -33.0559 |
| ZINC30549607 | -38.9304 |
| ZINC30571462 | -48.1458 |
| ZINC30612617 | -41.0853 |
| ZINC30613595 | -48.7299 |
| ZINC30692636 | -40.5181 |
| ZINC30692636 | -46.0868 |
| ZINC30772183 | -40.2454 |
| ZINC30874254 | -36.648  |
| ZINC30876549 | -41.3463 |
| ZINC30900255 | -42.8068 |
| ZINC30900255 | -43.5865 |
| ZINC30907348 | -44.3881 |
| ZINC30989145 | -44.2339 |
| ZINC31071442 | -44.269  |
| ZINC31095243 | -43.6322 |
| ZINC31155557 | -27.2252 |

|              |          |
|--------------|----------|
| ZINC31158967 | -39.875  |
| ZINC31158967 | -43.8029 |
| ZINC31168784 | -31.8203 |
| ZINC31264588 | -45.2655 |
| ZINC31283408 | -43.5459 |
| ZINC31295803 | -38.3155 |
| ZINC31297363 | -38.9444 |
| ZINC31342581 | -43.6174 |
| ZINC31397100 | -33.9022 |
| ZINC31398851 | -47.0651 |
| ZINC31448797 | -34.4366 |
| ZINC31614707 | -45.2013 |
| ZINC31649031 | -40.4402 |
| ZINC31660792 | -41.3477 |
| ZINC31765383 | -43.1362 |
| ZINC31775760 | -38.9366 |
| ZINC31783766 | -44.6712 |
| ZINC31791058 | -34.3817 |
| ZINC31799400 | -38.6038 |
| ZINC31809061 | -33.213  |
| ZINC31809061 | -39.2947 |
| ZINC31809061 | -43.8396 |
| ZINC31815966 | -38.3621 |
| ZINC31829166 | -39.4471 |
| ZINC31850663 | -40.478  |
| ZINC31850663 | -43.3404 |
| ZINC31871099 | -44.3471 |
| ZINC31939156 | -37.9994 |
| ZINC31945978 | -34.0786 |
| ZINC31945978 | -36.1791 |
| ZINC31979649 | -41.9597 |
| ZINC32029170 | -43.3472 |
| ZINC32031117 | -42.7712 |
| ZINC32068968 | -36.7851 |
| ZINC32073239 | -36.0345 |
| ZINC32098818 | -27.4961 |
| ZINC32099800 | -37.9597 |
| ZINC32100650 | -36.6033 |
| ZINC32101592 | -41.6286 |
| ZINC32102948 | -54.4209 |
| ZINC32102948 | -59.0151 |
| ZINC32108238 | -35.1116 |
| ZINC32109266 | -36.804  |
| ZINC32121291 | -27.8597 |



|              |          |
|--------------|----------|
| ZINC32124106 | -27.7998 |
| ZINC32127238 | -41.2787 |
| ZINC32151018 | -37.5133 |
| ZINC32176849 | -30.2345 |
| ZINC32181108 | -30.9025 |
| ZINC32193624 | -30.2618 |
| ZINC32197470 | -40.0528 |
| ZINC32202782 | -28.3771 |
| ZINC32222876 | -26.5025 |
| ZINC32231649 | -37.4627 |
| ZINC32250130 | -30.9403 |
| ZINC32298816 | -42.256  |
| ZINC32298816 | -44.7676 |
| ZINC32299594 | -30.5456 |
| ZINC32300176 | -42.8495 |
| ZINC32302477 | -33.9201 |
| ZINC32329567 | -40.1819 |
| ZINC32330048 | -37.5126 |
| ZINC32331680 | -44.5907 |
| ZINC32332027 | -42.3822 |
| ZINC32348841 | -42.1862 |
| ZINC32375215 | -34.1809 |
| ZINC32444372 | -28.7421 |
| ZINC32456404 | -45.4258 |
| ZINC32477689 | -48.0399 |
| ZINC32502208 | -40.8133 |
| ZINC32518645 | -50.0544 |
| ZINC32518656 | -50.1908 |
| ZINC32522371 | -29.3333 |
| ZINC32523698 | -36.1182 |
| ZINC32523698 | -36.9708 |
| ZINC32526043 | -40.5684 |
| ZINC32528361 | -41.9055 |
| ZINC32534806 | -35.2468 |
| ZINC32551677 | -38.4606 |
| ZINC32553310 | -31.7644 |
| ZINC32555693 | -32.6945 |
| ZINC32559910 | -24.8213 |
| ZINC32561111 | -33.7417 |
| ZINC32579212 | -27.4735 |
| ZINC32581815 | -38.6664 |
| ZINC32581815 | -52.1822 |
| ZINC32587128 | -34.9938 |
| ZINC32592823 | -38.3895 |

|              |          |
|--------------|----------|
| ZINC32594149 | -49.9767 |
| ZINC32595317 | -41.374  |
| ZINC32598056 | -30.0317 |
| ZINC32598056 | -34.5461 |
| ZINC32599836 | -33.128  |
| ZINC32599836 | -42.604  |
| ZINC32600230 | -34.9615 |
| ZINC32601431 | -35.269  |
| ZINC32602996 | -49.375  |
| ZINC32604874 | -34.8744 |
| ZINC32604874 | -38.3377 |
| ZINC32604874 | -39.4316 |
| ZINC32606074 | -42.801  |
| ZINC32608016 | -32.2708 |
| ZINC32611006 | -46.5554 |
| ZINC32617694 | -36.1767 |
| ZINC32617694 | -38.6202 |
| ZINC32623895 | -45.9902 |
| ZINC32625199 | -24.9646 |
| ZINC32625215 | -40.0008 |
| ZINC32633729 | -38.9209 |
| ZINC32666003 | -29.6439 |
| ZINC32666314 | -35.5369 |
| ZINC32666314 | -38.5792 |
| ZINC32676207 | -39.3587 |
| ZINC32676207 | -41.662  |
| ZINC32712845 | -32.5686 |
| ZINC32712888 | -46.4014 |
| ZINC32717162 | -45.0341 |
| ZINC32728338 | -38.3606 |
| ZINC32734513 | -39.3167 |
| ZINC32736256 | -41.348  |
| ZINC32738593 | -45.8895 |
| ZINC32747156 | -40.9224 |
| ZINC32747156 | -47.0881 |
| ZINC32748516 | -44.7667 |
| ZINC32753713 | -37.1621 |
| ZINC32753713 | -43.6539 |
| ZINC32754797 | -40.0696 |
| ZINC32759373 | -44.9848 |
| ZINC32759956 | -49.9766 |
| ZINC32762127 | -30.0019 |
| ZINC32762127 | -40.7017 |
| ZINC32776567 | -41.4876 |

|              |          |
|--------------|----------|
| ZINC32799137 | -32.4524 |
| ZINC32809749 | -32.4157 |
| ZINC32809749 | -32.6163 |
| ZINC32815344 | -42.3657 |
| ZINC32824991 | -38.3418 |
| ZINC32825036 | -41.0803 |
| ZINC32825222 | -29.5519 |
| ZINC32825222 | -35.5843 |
| ZINC32825290 | -41.0872 |
| ZINC32825290 | -43.3462 |
| ZINC32825604 | -42.207  |
| ZINC32830477 | -46.5364 |
| ZINC32842874 | -43.6908 |
| ZINC32845802 | -35.7272 |
| ZINC32865807 | -40.6378 |
| ZINC32870619 | -33.7214 |
| ZINC32871076 | -46.5431 |
| ZINC32879670 | -46.8768 |
| ZINC32888153 | -43.019  |
| ZINC32893003 | -40.4716 |
| ZINC32894396 | -33.3699 |
| ZINC32899890 | -42.3322 |
| ZINC32901363 | -35.0168 |
| ZINC32907513 | -37.1361 |
| ZINC32912757 | -40.8795 |
| ZINC32912865 | -46.8213 |
| ZINC32913086 | -41.1396 |
| ZINC32913325 | -23.4339 |
| ZINC32913325 | -39.6389 |
| ZINC32913343 | -36.2182 |
| ZINC32913343 | -43.8301 |
| ZINC32915188 | -26.8751 |
| ZINC32915372 | -41.548  |
| ZINC32918615 | -41.7975 |
| ZINC32918776 | -32.8469 |
| ZINC32919716 | -37.682  |
| ZINC32919967 | -29.4317 |
| ZINC32922504 | -41.5118 |
| ZINC32923585 | -40.2424 |
| ZINC32927010 | -44.4204 |
| ZINC32933439 | -28.5493 |
| ZINC32933439 | -35.4816 |
| ZINC32935316 | -23.3714 |
| ZINC32943919 | -34.7167 |

|              |          |
|--------------|----------|
| ZINC32945436 | -41.5001 |
| ZINC32947929 | -37.2392 |
| ZINC32948953 | -41.3567 |
| ZINC32960103 | -37.7435 |
| ZINC32967105 | -35.491  |
| ZINC32969749 | -35.0644 |
| ZINC32984469 | -42.0314 |
| ZINC32988028 | -48.0386 |
| ZINC32988083 | -37.781  |
| ZINC33012155 | -30.5903 |
| ZINC33026595 | -36.6016 |
| ZINC33026595 | -43.4656 |
| ZINC33027477 | -38.0017 |
| ZINC33034472 | -32.0914 |
| ZINC33039897 | -47.9462 |
| ZINC33042281 | -41.0849 |
| ZINC33048312 | -34.9407 |
| ZINC33048312 | -46.6754 |
| ZINC33048757 | -40.4806 |
| ZINC33049025 | -37.2332 |
| ZINC33066005 | -40.4396 |
| ZINC33077184 | -35.7262 |
| ZINC33077184 | -50.8302 |
| ZINC33085263 | -43.2582 |
| ZINC33085263 | -49.1533 |
| ZINC33086862 | -30.4992 |
| ZINC33087248 | -27.2694 |
| ZINC33125060 | -44.7548 |
| ZINC33126710 | -38.037  |
| ZINC33127112 | -35.8318 |
| ZINC33128202 | -42.8542 |
| ZINC33128853 | -39.7296 |
| ZINC33128925 | -36.9003 |
| ZINC33137844 | -45.0626 |
| ZINC33137918 | -31.8603 |
| ZINC33157329 | -44.6486 |
| ZINC33157338 | -40.9478 |
| ZINC33157395 | -34.1368 |
| ZINC33157395 | -38.2749 |
| ZINC33169726 | -41.5918 |
| ZINC33169726 | -42.5414 |
| ZINC33173240 | -39.9411 |
| ZINC33206909 | -39.6382 |
| ZINC33207834 | -44.3056 |

|              |          |
|--------------|----------|
| ZINC33208506 | -33.3243 |
| ZINC33208616 | -43.3891 |
| ZINC33215924 | -50.4475 |
| ZINC33252244 | -34.7901 |
| ZINC33255767 | -28.9208 |
| ZINC33264019 | -28.618  |
| ZINC33264019 | -30.6479 |
| ZINC33264019 | -36.2259 |
| ZINC33268173 | -48.4232 |
| ZINC33270213 | -33.0317 |
| ZINC33287348 | -27.6767 |
| ZINC33288705 | -44.3298 |
| ZINC33297581 | -36.4132 |
| ZINC33301989 | -53.4308 |
| ZINC33320006 | -44.3781 |
| ZINC33320577 | -37.7794 |
| ZINC33320577 | -43.4878 |
| ZINC33320704 | -37.5277 |
| ZINC33321074 | -31.586  |
| ZINC33321084 | -25.9625 |
| ZINC33324749 | -30.1871 |
| ZINC33325585 | -20.927  |
| ZINC33327819 | -41.0729 |
| ZINC33336620 | -36.1634 |
| ZINC33337499 | -44.6255 |
| ZINC33337499 | -46.5154 |
| ZINC33341096 | -47.3246 |
| ZINC33343642 | -43.4601 |
| ZINC33369427 | -30.1553 |
| ZINC33384448 | -39.6702 |
| ZINC33402679 | -41.7392 |
| ZINC33406124 | -39.0062 |
| ZINC33409349 | -45.7038 |
| ZINC33432939 | -31.5498 |
| ZINC33438527 | -21.5549 |
| ZINC33438660 | -30.7139 |
| ZINC33494537 | -34.6184 |
| ZINC33522497 | -39.0804 |
| ZINC33531358 | -22.1569 |
| ZINC33538553 | -44.8691 |
| ZINC33541965 | -24.4349 |
| ZINC33546997 | -41.0546 |
| ZINC33565529 | -43.4433 |
| ZINC33568222 | -36.4937 |

|              |          |
|--------------|----------|
| ZINC33568222 | -47.8771 |
| ZINC33570415 | -40.7707 |
| ZINC33624817 | -32.7942 |
| ZINC33624817 | -46.8788 |
| ZINC33635590 | -29.7331 |
| ZINC33648002 | -35.667  |
| ZINC33649272 | -37.5993 |
| ZINC33662376 | -36.9205 |
| ZINC33758273 | -32.8983 |
| ZINC33760244 | -30.9619 |
| ZINC33769471 | -42.3811 |
| ZINC33769471 | -46.368  |
| ZINC33770159 | -35.7456 |
| ZINC33775027 | -20.3798 |
| ZINC33775027 | -28.7941 |
| ZINC33810530 | -33.2134 |
| ZINC33810978 | -41.0976 |
| ZINC33812244 | -30.7438 |
| ZINC33820770 | -34.3719 |
| ZINC33928810 | -26.2697 |
| ZINC33929638 | -30.2954 |
| ZINC33929656 | -42.1038 |
| ZINC33929865 | -53.332  |
| ZINC33934834 | -35.8217 |
| ZINC33935388 | -36.9079 |
| ZINC33936365 | -31.508  |
| ZINC33937941 | -44.1756 |
| ZINC33985788 | -28.8538 |
| ZINC34050804 | -39.627  |
| ZINC34069982 | -38.5762 |
| ZINC34106673 | -49.0657 |
| ZINC34107540 | -46.6398 |
| ZINC34114993 | -31.7941 |
| ZINC34116054 | -30.6223 |
| ZINC34133121 | -35.1876 |
| ZINC34173096 | -36.0038 |
| ZINC34190910 | -52.4254 |
| ZINC34425447 | -28.8996 |
| ZINC34425447 | -31.6667 |
| ZINC34638743 | -31.1685 |
| ZINC34727089 | -36.4955 |
| ZINC34728474 | -33.9264 |
| ZINC34781632 | -31.7977 |
| ZINC34781667 | -35.2821 |

|              |          |
|--------------|----------|
| ZINC34789393 | -36.5748 |
| ZINC34791122 | -34.921  |
| ZINC34800239 | -27.8839 |
| ZINC34800239 | -35.7386 |
| ZINC34856464 | -22.5629 |
| ZINC34856464 | -24.7787 |
| ZINC34860762 | -33.4494 |
| ZINC34868084 | -44.5388 |
| ZINC34887301 | -31.1336 |
| ZINC34911981 | -31.4859 |
| ZINC34915965 | -35.0135 |
| ZINC34934013 | -39.1998 |
| ZINC34938023 | -31.5155 |
| ZINC34938023 | -33.1443 |
| ZINC34938998 | -32.3648 |
| ZINC34939688 | -33.885  |
| ZINC34943991 | -32.299  |
| ZINC34944445 | -24.1642 |
| ZINC34944445 | -40.665  |
| ZINC34967380 | -34.1841 |
| ZINC34967953 | -39.4008 |
| ZINC34972779 | -33.2001 |
| ZINC34973255 | -33.407  |
| ZINC35004093 | -36.1566 |
| ZINC35015530 | -38.3767 |
| ZINC35015530 | -40.1747 |
| ZINC35018426 | -45.0356 |
| ZINC35022535 | -30.9302 |
| ZINC35023187 | -46.1367 |
| ZINC35043219 | -33.5985 |
| ZINC35047063 | -40.9352 |
| ZINC35055089 | -37.9901 |
| ZINC35100513 | -38.1999 |
| ZINC35135230 | -41.9685 |
| ZINC35142878 | -26.0972 |
| ZINC35146606 | -37.6897 |
| ZINC35179493 | -37.8802 |
| ZINC35185391 | -33.9832 |
| ZINC35205873 | -38.1633 |
| ZINC35231149 | -34.0174 |
| ZINC35257820 | -34.2197 |
| ZINC35269293 | -45.3325 |
| ZINC35283228 | -45.3655 |
| ZINC35288193 | -36.827  |

|              |          |
|--------------|----------|
| ZINC35289730 | -34.7186 |
| ZINC35291848 | -39.3092 |
| ZINC35311690 | -43.621  |
| ZINC35312191 | -44.7281 |
| ZINC35312329 | -44.8006 |
| ZINC35324216 | -38.5827 |
| ZINC35361602 | -30.3768 |
| ZINC35378271 | -29.327  |
| ZINC35378451 | -45.1607 |
| ZINC35392760 | -27.6017 |
| ZINC35399277 | -27.3761 |
| ZINC35415591 | -30.8184 |
| ZINC35415837 | -32.1892 |
| ZINC35430472 | -44.2267 |
| ZINC35443733 | -32.9612 |
| ZINC35443733 | -35.9454 |
| ZINC35447787 | -23.7816 |
| ZINC35447787 | -25.484  |
| ZINC35447897 | -31.3458 |
| ZINC35454727 | -30.7207 |
| ZINC35460793 | -35.6632 |
| ZINC35475147 | -31.8555 |
| ZINC35480807 | -34.4097 |
| ZINC35505242 | -29.1329 |
| ZINC35515789 | -24.6079 |
| ZINC35520267 | -40.0682 |
| ZINC35520267 | -42.1744 |
| ZINC35520544 | -30.5215 |
| ZINC35551388 | -36.3446 |
| ZINC35561617 | -37.7532 |
| ZINC35565847 | -30.9623 |
| ZINC35570422 | -33.6408 |
| ZINC35576730 | -30.6139 |
| ZINC35577438 | -40.1018 |
| ZINC35587930 | -36.2471 |
| ZINC35598244 | -35.3281 |
| ZINC35622239 | -31.922  |
| ZINC35622692 | -51.894  |
| ZINC35622692 | -55.8697 |
| ZINC35622805 | -33.0051 |
| ZINC35622805 | -33.6167 |
| ZINC35627538 | -34.6104 |
| ZINC35682731 | -32.0127 |
| ZINC35805207 | -35.5327 |



|              |          |
|--------------|----------|
| ZINC35828124 | -18.404  |
| ZINC35828124 | -27.4147 |
| ZINC35828124 | -31.3779 |
| ZINC35828147 | -34.418  |
| ZINC35851664 | -25.1822 |
| ZINC35851664 | -27.8229 |
| ZINC35851790 | -27.4305 |
| ZINC35877072 | -33.8938 |
| ZINC35877104 | -14.1029 |
| ZINC35897654 | -37.3487 |
| ZINC35897875 | -34.1699 |
| ZINC35923986 | -30.9086 |
| ZINC35946758 | -42.565  |
| ZINC35946758 | -42.7703 |
| ZINC36025454 | -34.0287 |
| ZINC36030381 | -31.6105 |
| ZINC36047721 | -46.4536 |
| ZINC36047721 | -47.2426 |
| ZINC36079039 | -33.4997 |
| ZINC36095480 | -33.1092 |
| ZINC36095597 | -38.1509 |
| ZINC36129825 | -48.0511 |
| ZINC36139411 | -42.1849 |
| ZINC36157522 | -41.5394 |
| ZINC36167735 | -37.2034 |
| ZINC36167735 | -44.2608 |
| ZINC36174035 | -42.9749 |
| ZINC36237470 | -40.5073 |
| ZINC36243900 | -30.507  |
| ZINC36294163 | -44.8303 |
| ZINC36325665 | -33.6412 |
| ZINC36354921 | -36.39   |
| ZINC36357283 | -41.0071 |
| ZINC36357283 | -41.0695 |
| ZINC36357984 | -35.7211 |
| ZINC36360185 | -36.3367 |
| ZINC36377919 | -34.8494 |
| ZINC36382730 | -28.2884 |
| ZINC36386249 | -32.5797 |
| ZINC36389817 | -39.609  |
| ZINC36392464 | -31.3127 |
| ZINC36392464 | -39.0807 |
| ZINC36395208 | -34.9687 |
| ZINC36395726 | -42.3915 |

|              |          |
|--------------|----------|
| ZINC36397800 | -38.3788 |
| ZINC36457050 | -31.8205 |
| ZINC36457050 | -42.8896 |
| ZINC36496276 | -52.1789 |
| ZINC36533075 | -28.4064 |
| ZINC36533166 | -20.4571 |
| ZINC36533593 | -35.034  |
| ZINC36533593 | -36.7994 |
| ZINC36564325 | -33.4746 |
| ZINC36569656 | -30.2737 |
| ZINC36580034 | -28.3933 |
| ZINC36611150 | -39.2908 |
| ZINC36619625 | -34.8454 |
| ZINC36625392 | -39.5206 |
| ZINC36625457 | -29.2035 |
| ZINC36633875 | -30.4737 |
| ZINC36633875 | -36.9219 |
| ZINC36633875 | -38.0492 |
| ZINC36633875 | -41.0115 |
| ZINC36646757 | -35.2939 |
| ZINC36669090 | -34.5344 |
| ZINC36675751 | -36.5672 |
| ZINC36683001 | -33.9065 |
| ZINC36685862 | -51.4385 |
| ZINC36697488 | -44.3882 |
| ZINC36704735 | -41.2722 |
| ZINC36706888 | -32.4799 |
| ZINC36706888 | -37.8086 |
| ZINC36709978 | -26.9424 |
| ZINC36722408 | -30.3351 |
| ZINC36724592 | -31.6682 |
| ZINC36724592 | -34.9198 |
| ZINC36739120 | -35.8842 |
| ZINC36768449 | -42.1744 |
| ZINC36793788 | -39.9937 |
| ZINC36793851 | -36.9551 |
| ZINC36803559 | -45.5062 |
| ZINC36812397 | -33.2208 |
| ZINC36812397 | -33.8254 |
| ZINC36875640 | -42.6673 |
| ZINC36877125 | -40.6483 |
| ZINC37023424 | -31.8379 |
| ZINC37061990 | -49.5926 |
| ZINC37133037 | -45.5568 |

|              |          |
|--------------|----------|
| ZINC37228236 | -31.9694 |
| ZINC37229535 | -44.3545 |
| ZINC37246219 | -35.4388 |
| ZINC37315191 | -35.4227 |
| ZINC37359367 | -37.5291 |
| ZINC37359367 | -40.227  |
| ZINC37360342 | -35.0239 |
| ZINC37396806 | -37.9945 |
| ZINC37419137 | -28.1734 |
| ZINC37419345 | -45.8218 |
| ZINC37448219 | -29.2048 |
| ZINC37460363 | -33.8917 |
| ZINC37466245 | -28.3634 |
| ZINC37489245 | -35.6099 |
| ZINC37518268 | -49.1934 |
| ZINC37579676 | -42.4898 |
| ZINC37624267 | -34.3125 |
| ZINC37625483 | -28.839  |
| ZINC37632667 | -34.2408 |
| ZINC37638266 | -35.572  |
| ZINC37638330 | -31.7596 |
| ZINC37638463 | -24.2172 |
| ZINC37666676 | -33.415  |
| ZINC37704458 | -32.5917 |
| ZINC37731481 | -38.9046 |
| ZINC37731481 | -43.4608 |
| ZINC37731489 | -40.2018 |
| ZINC37731489 | -43.1742 |
| ZINC37740999 | -36.6146 |
| ZINC37763792 | -32.8197 |
| ZINC37791049 | -40.054  |
| ZINC37797055 | -36.196  |
| ZINC37866039 | -41.267  |
| ZINC37867242 | -41.5459 |
| ZINC37867242 | -46.8825 |
| ZINC37933947 | -34.5351 |
| ZINC37977562 | -39.9706 |
| ZINC37979975 | -37.2573 |
| ZINC37998545 | -39.659  |
| ZINC38078360 | -34.8856 |
| ZINC38086674 | -33.0643 |
| ZINC38140740 | -40.1206 |
| ZINC38141164 | -31.1813 |
| ZINC38141164 | -35.5898 |

|              |          |
|--------------|----------|
| ZINC38223351 | -43.469  |
| ZINC38223351 | -47.2502 |
| ZINC38237023 | -32.3788 |
| ZINC38255259 | -31.9385 |
| ZINC38255259 | -36.424  |
| ZINC38491950 | -42.2465 |
| ZINC38508067 | -40.4267 |
| ZINC38510231 | -38.7534 |
| ZINC38519546 | -40.58   |
| ZINC38529996 | -37.8367 |
| ZINC38575553 | -43.8563 |
| ZINC38580305 | -30.9815 |
| ZINC38583454 | -37.8658 |
| ZINC38587815 | -41.5423 |
| ZINC38596728 | -44.7954 |
| ZINC38597008 | -38.7288 |
| ZINC38597068 | -40.1311 |
| ZINC38599295 | -36.8259 |
| ZINC38603034 | -35.5312 |
| ZINC38605329 | -36.312  |
| ZINC38605329 | -40.0062 |
| ZINC38610182 | -40.404  |
| ZINC38611542 | -35.0514 |
| ZINC38611542 | -36.5636 |
| ZINC38613880 | -34.5373 |
| ZINC38613880 | -42.0562 |
| ZINC38615873 | -49.3902 |
| ZINC38619459 | -32.4516 |
| ZINC38622142 | -31.3816 |
| ZINC38630340 | -38.0244 |
| ZINC38630340 | -44.364  |
| ZINC38630540 | -43.6969 |
| ZINC38646193 | -37.7658 |
| ZINC38653958 | -29.1883 |
| ZINC38659253 | -35.2541 |
| ZINC38659393 | -37.6158 |
| ZINC38661619 | -41.3256 |
| ZINC38671267 | -33.8813 |
| ZINC38678404 | -39.6247 |
| ZINC38688948 | -18.922  |
| ZINC38701769 | -11.5611 |
| ZINC38701769 | -26.19   |
| ZINC38704459 | -43.8775 |
| ZINC38704553 | -40.1921 |

|              |          |
|--------------|----------|
| ZINC38704571 | -34.3398 |
| ZINC38710425 | -36.686  |
| ZINC38710533 | -36.0204 |
| ZINC38711730 | -38.7017 |
| ZINC38712841 | -30.1152 |
| ZINC38722078 | -37.4497 |
| ZINC38725682 | -39.7458 |
| ZINC38728807 | -30.4239 |
| ZINC38728807 | -40.3076 |
| ZINC38730946 | -45.3695 |
| ZINC38736840 | -34.2798 |
| ZINC38736840 | -40.809  |
| ZINC38740295 | -38.6834 |
| ZINC38741226 | -28.9225 |
| ZINC38741226 | -42.5677 |
| ZINC38752288 | -27.158  |
| ZINC38752839 | -40.1826 |
| ZINC38754125 | -45.2162 |
| ZINC38754602 | -40.0652 |
| ZINC38767532 | -31.6456 |
| ZINC38767631 | -55.2819 |
| ZINC38767894 | -46.1336 |
| ZINC38767901 | -46.5746 |
| ZINC38776781 | -37.5671 |
| ZINC38776781 | -40.7635 |
| ZINC38782376 | -37.1623 |
| ZINC38787490 | -40.0141 |
| ZINC38787620 | -34.6392 |
| ZINC38814575 | -45.0643 |
| ZINC38835333 | -43.7238 |
| ZINC38840572 | -45.329  |
| ZINC38874865 | -38.3478 |
| ZINC38890270 | -35.6423 |
| ZINC38904970 | -43.9693 |
| ZINC38905793 | -45.8085 |
| ZINC38906031 | -40.8466 |
| ZINC38906193 | -38.1578 |
| ZINC38906306 | -47.7016 |
| ZINC38907440 | -48.6271 |
| ZINC38908430 | -30.8912 |
| ZINC38908430 | -34.1593 |
| ZINC38917508 | -47.4334 |
| ZINC38924825 | -42.1124 |
| ZINC38924969 | -33.4608 |

|              |          |
|--------------|----------|
| ZINC38932135 | -42.9643 |
| ZINC38932135 | -50.4447 |
| ZINC38933303 | -40.8321 |
| ZINC38943817 | -39.0004 |
| ZINC38946807 | -49.9445 |
| ZINC38958973 | -26.2061 |
| ZINC38959233 | -41.7908 |
| ZINC38959362 | -31.6067 |
| ZINC38979560 | -37.9653 |
| ZINC38979661 | -45.6553 |
| ZINC38979757 | -28.3275 |
| ZINC38980060 | -42.2214 |
| ZINC38980158 | -46.8544 |
| ZINC38980158 | -50.1037 |
| ZINC38980656 | -36.245  |
| ZINC38980954 | -46.2273 |
| ZINC38984503 | -37.1719 |
| ZINC38984682 | -34.0738 |
| ZINC38984682 | -38.4622 |
| ZINC38989892 | -34.928  |
| ZINC38999571 | -27.6645 |
| ZINC39006658 | -37.0854 |
| ZINC39006658 | -37.7174 |
| ZINC39006658 | -39.3531 |
| ZINC39006717 | -36.9408 |
| ZINC39007295 | -35.0364 |
| ZINC39007295 | -45.5954 |
| ZINC39016281 | -45.3681 |
| ZINC39016648 | -35.7623 |
| ZINC39022335 | -32.8309 |
| ZINC39024924 | -55.2008 |
| ZINC39029652 | -33.3701 |
| ZINC39034889 | -40.9624 |
| ZINC39034889 | -42.7437 |
| ZINC39055076 | -28.4539 |
| ZINC39055270 | -26.9064 |
| ZINC39055305 | -32.1524 |
| ZINC39055451 | -27.0282 |
| ZINC39056944 | -28.9861 |
| ZINC39057203 | -27.3621 |
| ZINC39085153 | -28.7639 |
| ZINC39147799 | -24.1129 |
| ZINC39152888 | -36.8435 |
| ZINC39164205 | -43.8172 |

|              |          |
|--------------|----------|
| ZINC39164422 | -22.1688 |
| ZINC39164422 | -31.4136 |
| ZINC39214534 | -55.0239 |
| ZINC39217266 | -35.3953 |
| ZINC39217266 | -45.699  |
| ZINC39217598 | -21.4625 |
| ZINC39217598 | -25.5623 |
| ZINC39218159 | -37.2648 |
| ZINC39231769 | -33.2632 |
| ZINC39237537 | -27.4646 |
| ZINC39237537 | -32.1474 |
| ZINC39237697 | -46.1874 |
| ZINC39237901 | -30.9093 |
| ZINC39239872 | -27.968  |
| ZINC39243629 | -34.5935 |
| ZINC39257430 | -33.792  |
| ZINC39268976 | -25.3059 |
| ZINC39276494 | -49.7392 |
| ZINC39280075 | -30.2465 |
| ZINC39280092 | -46.7336 |
| ZINC39288287 | -41.755  |
| ZINC39299327 | -30.633  |
| ZINC39304040 | -42.9427 |
| ZINC39313365 | -39.8974 |
| ZINC39314136 | -43.0436 |
| ZINC39327746 | -36.4212 |
| ZINC39340410 | -36.3368 |
| ZINC39345150 | -39.5398 |
| ZINC39350910 | -35.7998 |
| ZINC39352779 | -33.3637 |
| ZINC39352779 | -36.6692 |
| ZINC39353023 | -37.6219 |
| ZINC39356597 | -43.3339 |
| ZINC39358453 | -33.6532 |
| ZINC39359959 | -29.712  |
| ZINC39360234 | -42.1382 |
| ZINC39360369 | -40.2871 |
| ZINC39360882 | -38.0224 |
| ZINC39360976 | -38.5941 |
| ZINC39369803 | -44.1215 |
| ZINC39371164 | -38.7525 |
| ZINC39373063 | -40.4495 |
| ZINC39373302 | -39.1054 |
| ZINC39373470 | -34.6902 |

|              |          |
|--------------|----------|
| ZINC39380677 | -33.5973 |
| ZINC39380716 | -44.0209 |
| ZINC39381113 | -35.1099 |
| ZINC39383770 | -30.6264 |
| ZINC39394123 | -21.2001 |
| ZINC39394729 | -26.9048 |
| ZINC39394729 | -29.4599 |
| ZINC39395766 | -27.1104 |
| ZINC39399684 | -24.5714 |
| ZINC39404648 | -34.6812 |
| ZINC39409778 | -31.5524 |
| ZINC39412158 | -27.2469 |
| ZINC39421663 | -44.3858 |
| ZINC39421930 | -44.2627 |
| ZINC39430769 | -45.8274 |
| ZINC39437579 | -36.2635 |
| ZINC39439911 | -17.7757 |
| ZINC39442068 | -36.3056 |
| ZINC39454991 | -37.4848 |
| ZINC39461405 | -34.064  |
| ZINC39461593 | -41.1064 |
| ZINC39478536 | -35.0271 |
| ZINC39490387 | -37.8374 |
| ZINC39490670 | -34.1975 |
| ZINC39500368 | -34.614  |
| ZINC39518421 | -37.9746 |
| ZINC39543138 | -31.23   |
| ZINC39551974 | -33.0007 |
| ZINC39551974 | -40.1067 |
| ZINC39552477 | -42.9181 |
| ZINC39572416 | -44.4536 |
| ZINC39572423 | -43.9558 |
| ZINC39574939 | -27.9827 |
| ZINC39586179 | -33.7586 |
| ZINC39588241 | -38.5551 |
| ZINC39605894 | -30.9205 |
| ZINC39617578 | -45.5752 |
| ZINC39698322 | -28.4388 |
| ZINC39702446 | -45.7904 |
| ZINC39707384 | -41.4593 |
| ZINC39711733 | -41.0229 |
| ZINC39727183 | -32.059  |
| ZINC39729729 | -36.3405 |
| ZINC39729729 | -37.0884 |



|              |          |
|--------------|----------|
| ZINC39736963 | -32.3278 |
| ZINC39760575 | -30.5286 |
| ZINC39764008 | -34.4121 |
| ZINC39776530 | -46.0993 |
| ZINC39778619 | -35.7553 |
| ZINC39780810 | -30.9184 |
| ZINC39843620 | -47.4317 |
| ZINC39843978 | -26.83   |
| ZINC39844184 | -28.3977 |
| ZINC39845101 | -32.6406 |
| ZINC39845392 | -34.7674 |
| ZINC39845796 | -21.4634 |
| ZINC39845985 | -25.9901 |
| ZINC39846032 | -27.5456 |
| ZINC39848532 | -29.5493 |
| ZINC39849454 | -28.7324 |
| ZINC39851185 | -37.6725 |
| ZINC39851591 | -33.8134 |
| ZINC39851844 | -40.8366 |
| ZINC39852515 | -45.3942 |
| ZINC39854184 | -36.3562 |
| ZINC39854712 | -35.9917 |
| ZINC39859978 | -46.4592 |
| ZINC39860219 | -47.6294 |
| ZINC39860474 | -40.8744 |
| ZINC39860781 | -42.4167 |
| ZINC39861013 | -38.1409 |
| ZINC39868100 | -45.6969 |
| ZINC39870269 | -47.5212 |
| ZINC39870269 | -49.0097 |
| ZINC39870610 | -38.9448 |
| ZINC39870755 | -41.7155 |
| ZINC39871006 | -30.187  |
| ZINC39871033 | -38.1287 |
| ZINC39871164 | -31.0129 |
| ZINC39871391 | -42.1425 |
| ZINC39880199 | -28.1167 |
| ZINC39880212 | -26.3856 |
| ZINC39880224 | -36.9492 |
| ZINC39880575 | -39.403  |
| ZINC39881113 | -32.6345 |
| ZINC39885494 | -44.9538 |
| ZINC39885494 | -51.3144 |
| ZINC39886407 | -33.3197 |

|              |          |
|--------------|----------|
| ZINC39887797 | -49.561  |
| ZINC39891733 | -36.3056 |
| ZINC39892472 | -39.0123 |
| ZINC39893993 | -31.6767 |
| ZINC39898777 | -22.5122 |
| ZINC39899425 | -36.0257 |
| ZINC39899482 | -41.8685 |
| ZINC39899495 | -37.8929 |
| ZINC39912837 | -33.8314 |
| ZINC39916902 | -27.0177 |
| ZINC39916902 | -29.7915 |
| ZINC39917172 | -30.3751 |
| ZINC39917172 | -31.3662 |
| ZINC39917181 | -31.5043 |
| ZINC39917181 | -31.8103 |
| ZINC39918825 | -34.679  |
| ZINC39919000 | -15.7279 |
| ZINC39930266 | -29.5759 |
| ZINC39932362 | -50.5321 |
| ZINC39932362 | -52.2669 |
| ZINC39935718 | -33.1488 |
| ZINC39936148 | -42.4246 |
| ZINC39936148 | -45.6223 |
| ZINC39939630 | -42.3056 |
| ZINC39940188 | -40.73   |
| ZINC39940188 | -47.4538 |
| ZINC39940598 | -38.6595 |
| ZINC39948835 | -38.7506 |
| ZINC39949008 | -30.3133 |
| ZINC39949234 | -40.8813 |
| ZINC39949350 | -42.7909 |
| ZINC39950901 | -33.6305 |
| ZINC39952830 | -39.9621 |
| ZINC39952830 | -40.2184 |
| ZINC39952831 | -41.4939 |
| ZINC39952831 | -41.5124 |
| ZINC39952893 | -40.4658 |
| ZINC39952977 | -39.3625 |
| ZINC39954197 | -47.9151 |
| ZINC39955810 | -42.1278 |
| ZINC39956165 | -35.726  |
| ZINC39956863 | -41.4566 |
| ZINC39961292 | -28.2194 |
| ZINC39961400 | -42.7411 |

|              |          |
|--------------|----------|
| ZINC39962456 | -43.0105 |
| ZINC39967901 | -36.4567 |
| ZINC39967901 | -41.2771 |
| ZINC39978300 | -37.7864 |
| ZINC39978300 | -39.5318 |
| ZINC39978991 | -35.4198 |
| ZINC39979790 | -39.4482 |
| ZINC39995837 | -48.3386 |
| ZINC39996160 | -35.5635 |
| ZINC40001206 | -38.0414 |
| ZINC40004967 | -40.2259 |
| ZINC40017439 | -44.5584 |
| ZINC40018010 | -38.4069 |
| ZINC40024483 | -45.7599 |
| ZINC40034258 | -50.1997 |
| ZINC40049600 | -38.732  |
| ZINC40049956 | -39.8403 |
| ZINC40050456 | -39.8297 |
| ZINC40050563 | -28.937  |
| ZINC40051022 | -45.2862 |
| ZINC40052124 | -50.033  |
| ZINC40060420 | -38.4088 |
| ZINC40063042 | -51.4283 |
| ZINC40071398 | -36.3675 |
| ZINC40071544 | -50.9207 |
| ZINC40072699 | -43.8542 |
| ZINC40081266 | -28.9037 |
| ZINC40087567 | -33.7982 |
| ZINC40087802 | -45.2392 |
| ZINC40095312 | -36.4415 |
| ZINC40099061 | -38.7892 |
| ZINC40106073 | -33.0906 |
| ZINC40107133 | -32.2404 |
| ZINC40118589 | -26.4857 |
| ZINC40119382 | -50.3963 |
| ZINC40121816 | -40.1326 |
| ZINC40128178 | -43.2032 |
| ZINC40128602 | -45.8576 |
| ZINC40139240 | -39.9107 |
| ZINC40141047 | -48.9778 |
| ZINC40142421 | -29.3531 |
| ZINC40142421 | -35.4665 |
| ZINC40143951 | -47.6869 |
| ZINC40144124 | -35.5029 |

|              |          |
|--------------|----------|
| ZINC40148178 | -28.4639 |
| ZINC40148776 | -28.0525 |
| ZINC40153983 | -46.8774 |
| ZINC40154266 | -43.9333 |
| ZINC40155388 | -36.1502 |
| ZINC40156916 | -31.0638 |
| ZINC40156916 | -43.0159 |
| ZINC40161064 | -44.6099 |
| ZINC40161719 | -38.4716 |
| ZINC40167703 | -43.827  |
| ZINC40173562 | -35.1564 |
| ZINC40182213 | -30.676  |
| ZINC40216724 | -29.3111 |
| ZINC40216724 | -31.4908 |
| ZINC40216835 | -30.7859 |
| ZINC40216835 | -32.0858 |
| ZINC40216890 | -37.1257 |
| ZINC40218820 | -37.6049 |
| ZINC40229984 | -44.8485 |
| ZINC40277149 | -40.0489 |
| ZINC40278448 | -42.1512 |
| ZINC40284277 | -47.8883 |
| ZINC40285907 | -37.859  |
| ZINC40287151 | -48.1313 |
| ZINC40295514 | -31.4046 |
| ZINC40295556 | -30.9582 |
| ZINC40296709 | -41.379  |
| ZINC40299514 | -31.0113 |
| ZINC40299514 | -31.4777 |
| ZINC40309831 | -43.4531 |
| ZINC40312865 | -33.23   |
| ZINC40322184 | -41.4403 |
| ZINC40322342 | -23.7307 |
| ZINC40322406 | -37.1375 |
| ZINC40322585 | -34.4572 |
| ZINC40343967 | -34.2721 |
| ZINC40351136 | -43.5038 |
| ZINC40383898 | -37.9462 |
| ZINC40384879 | -41.1053 |
| ZINC40406177 | -43.6607 |
| ZINC40406177 | -43.941  |
| ZINC40422433 | -32.992  |
| ZINC40436131 | -37.289  |
| ZINC40436131 | -39.2634 |

|              |          |
|--------------|----------|
| ZINC40449901 | -29.2326 |
| ZINC40450912 | -36.5471 |
| ZINC40450916 | -37.1218 |
| ZINC40451414 | -26.5703 |
| ZINC40455404 | -41.1309 |
| ZINC40458720 | -33.1559 |
| ZINC40460677 | -37.8941 |
| ZINC40460677 | -41.2674 |
| ZINC40461955 | -33.4768 |
| ZINC40479625 | -39.8074 |
| ZINC40493513 | -41.88   |
| ZINC40497029 | -30.0879 |
| ZINC40497083 | -33.4309 |
| ZINC40497083 | -39.0454 |
| ZINC40510999 | -38.2635 |
| ZINC40514330 | -36.1784 |
| ZINC40514475 | -38.8672 |
| ZINC40522023 | -42.7454 |
| ZINC40522172 | -42.5251 |
| ZINC40522822 | -46.1635 |
| ZINC40523487 | -33.2054 |
| ZINC40536251 | -37.061  |
| ZINC40539314 | -41.5318 |
| ZINC40542435 | -39.7317 |
| ZINC40542957 | -39.9356 |
| ZINC40545385 | -30.8485 |
| ZINC40546200 | -33.2719 |
| ZINC40554267 | -38.7544 |
| ZINC40555902 | -25.2182 |
| ZINC40563744 | -45.4456 |
| ZINC40564571 | -39.9271 |
| ZINC40569507 | -28.4915 |
| ZINC40571151 | -38.2707 |
| ZINC40571151 | -40.6201 |
| ZINC40571683 | -36.5212 |
| ZINC40572461 | -41.1266 |
| ZINC40572631 | -44.1047 |
| ZINC40573059 | -38.0913 |
| ZINC40581497 | -33.2882 |
| ZINC40608852 | -37.2963 |
| ZINC40609834 | -37.8146 |
| ZINC40611566 | -33.7235 |
| ZINC40611566 | -36.7638 |
| ZINC40612553 | -36.8409 |

|              |          |
|--------------|----------|
| ZINC40612580 | -40.4058 |
| ZINC40623856 | -43.0812 |
| ZINC40625407 | -39.725  |
| ZINC40626448 | -29.4403 |
| ZINC40626448 | -30.8093 |
| ZINC40628337 | -43.0903 |
| ZINC40645492 | -41.9549 |
| ZINC40645589 | -41.2623 |
| ZINC40645589 | -46.7195 |
| ZINC40646279 | -39.0501 |
| ZINC40646529 | -27.0836 |
| ZINC40646529 | -32.1497 |
| ZINC40647590 | -34.7655 |
| ZINC40648381 | -42.8511 |
| ZINC40657766 | -45.3877 |
| ZINC40658607 | -40.6789 |
| ZINC40659658 | -37.6717 |
| ZINC40659681 | -39.6325 |
| ZINC40659706 | -35.301  |
| ZINC40659772 | -41.6515 |
| ZINC40659776 | -42.7708 |
| ZINC40659776 | -44.8472 |
| ZINC40660873 | -32.0919 |
| ZINC40661580 | -49.0854 |
| ZINC40680404 | -36.9928 |
| ZINC40687917 | -43.3851 |
| ZINC40705478 | -30.3831 |
| ZINC40706664 | -34.3647 |
| ZINC40708432 | -43.0373 |
| ZINC40708781 | -41.82   |
| ZINC40708846 | -38.5868 |
| ZINC40708846 | -43.8839 |
| ZINC40708967 | -33.5828 |
| ZINC40708967 | -35.0187 |
| ZINC40709001 | -39.2291 |
| ZINC40709001 | -39.8225 |
| ZINC40709201 | -37.0389 |
| ZINC40723512 | -37.8552 |
| ZINC40723512 | -38.9868 |
| ZINC40727011 | -39.6012 |
| ZINC40727194 | -52.0011 |
| ZINC40735606 | -23.3    |
| ZINC40753525 | -46.0205 |
| ZINC40754066 | -45.5138 |

|              |          |
|--------------|----------|
| ZINC40755105 | -45.8056 |
| ZINC40756077 | -44.9725 |
| ZINC40756077 | -63.4435 |
| ZINC40756640 | -45.3104 |
| ZINC40758036 | -44.141  |
| ZINC40758036 | -44.5885 |
| ZINC40771142 | -29.7366 |
| ZINC40773803 | -34.7259 |
| ZINC40774128 | -40.1408 |
| ZINC40775156 | -29.0119 |
| ZINC40775231 | -31.4119 |
| ZINC40775771 | -33.9449 |
| ZINC40775771 | -37.9359 |
| ZINC40776013 | -32.5445 |
| ZINC40776111 | -39.6261 |
| ZINC40776489 | -30.7945 |
| ZINC40776489 | -32.5991 |
| ZINC40778747 | -44.4418 |
| ZINC40779254 | -36.9704 |
| ZINC40793927 | -40.6115 |
| ZINC40797924 | -30.5092 |
| ZINC40799498 | -34.7198 |
| ZINC40799498 | -36.296  |
| ZINC40801208 | -35.8598 |
| ZINC40801379 | -42.408  |
| ZINC40803209 | -38.7073 |
| ZINC40808187 | -38.3058 |
| ZINC40808187 | -43.6945 |
| ZINC40809326 | -42.065  |
| ZINC40809326 | -43.8274 |
| ZINC40811353 | -41.926  |
| ZINC40811946 | -33.9791 |
| ZINC40812002 | -37.2974 |
| ZINC40812211 | -45.0194 |
| ZINC40812259 | -40.0972 |
| ZINC40812758 | -39.8162 |
| ZINC40812975 | -26.6499 |
| ZINC40813903 | -43.2887 |
| ZINC40814590 | -29.5049 |
| ZINC40815061 | -43.752  |
| ZINC40822123 | -40.13   |
| ZINC40822123 | -42.2841 |
| ZINC40825168 | -47.3083 |
| ZINC40825202 | -29.2571 |

|              |          |
|--------------|----------|
| ZINC40825892 | -38.4518 |
| ZINC40826444 | -39.3435 |
| ZINC40847793 | -38.5074 |
| ZINC40888358 | -39.6844 |
| ZINC40889320 | -36.8151 |
| ZINC40889944 | -40.858  |
| ZINC40898908 | -40.9368 |
| ZINC40912239 | -43.0627 |
| ZINC40940687 | -34.3942 |
| ZINC40945441 | -32.2214 |
| ZINC40980503 | -36.568  |
| ZINC40980503 | -36.7175 |
| ZINC41026641 | -42.1133 |
| ZINC41026726 | -32.8614 |
| ZINC41074364 | -33.6145 |
| ZINC41077895 | -41.1999 |
| ZINC41082244 | -34.808  |
| ZINC41082244 | -35.012  |
| ZINC41083093 | -29.579  |
| ZINC41108093 | -34.3824 |
| ZINC41108232 | -28.8915 |
| ZINC41116864 | -40.1631 |
| ZINC41146144 | -40.1181 |
| ZINC41146414 | -35.6402 |
| ZINC41149345 | -39.4252 |
| ZINC41149345 | -42.1939 |
| ZINC41152450 | -30.9014 |
| ZINC41152450 | -40.6975 |
| ZINC41153149 | -38.1374 |
| ZINC41184852 | -36.1544 |
| ZINC41197811 | -34.1063 |
| ZINC41213215 | -31.2877 |
| ZINC41229119 | -31.3872 |
| ZINC41229119 | -36.0645 |
| ZINC41275645 | -40.5779 |
| ZINC41275645 | -44.5393 |
| ZINC41275682 | -41.896  |
| ZINC41275682 | -46.9905 |
| ZINC41353875 | -45.4523 |
| ZINC41359600 | -37.3714 |
| ZINC41394401 | -38.4291 |
| ZINC41409308 | -39.5596 |
| ZINC41431613 | -40.6608 |
| ZINC41431972 | -37.7244 |



|              |          |
|--------------|----------|
| ZINC41435352 | -31.6141 |
| ZINC41438014 | -43.8312 |
| ZINC41465523 | -33.2145 |
| ZINC41469405 | -40.8167 |
| ZINC41489259 | -45.352  |
| ZINC41494737 | -40.3677 |
| ZINC41496617 | -34.7885 |
| ZINC41511169 | -39.6968 |
| ZINC41513382 | -29.0793 |
| ZINC41513382 | -32.7279 |
| ZINC41514904 | -34.5641 |
| ZINC41515097 | -33.0474 |
| ZINC41515147 | -28.7002 |
| ZINC41515147 | -42.3847 |
| ZINC41517453 | -42.2591 |
| ZINC41537129 | -36.5341 |
| ZINC41543726 | -27.1672 |
| ZINC41544453 | -26.8383 |
| ZINC41544582 | -23.5026 |
| ZINC41544973 | -50.1888 |
| ZINC41545404 | -37.1277 |
| ZINC41545591 | -47.3997 |
| ZINC41546987 | -43.0017 |
| ZINC41547394 | -36.1661 |
| ZINC41553195 | -43.716  |
| ZINC41570268 | -41.5408 |
| ZINC41574352 | -31.9505 |
| ZINC41584886 | -24.055  |
| ZINC41584886 | -24.3028 |
| ZINC41584887 | -28.7337 |
| ZINC41584887 | -43.5286 |
| ZINC41586548 | -26.3589 |
| ZINC41586548 | -30.6915 |
| ZINC41586984 | -33.9508 |
| ZINC41586984 | -35.9333 |
| ZINC41587558 | -41.8619 |
| ZINC41590069 | -44.75   |
| ZINC41600634 | -33.9872 |
| ZINC41625934 | -38.3716 |
| ZINC41625934 | -38.8595 |
| ZINC41644892 | -48.739  |
| ZINC41645467 | -39.3852 |
| ZINC41649196 | -26.1569 |
| ZINC41649196 | -28.4911 |

|              |          |
|--------------|----------|
| ZINC41649731 | -45.4571 |
| ZINC41651523 | -23.7244 |
| ZINC41653906 | -46.2753 |
| ZINC41655216 | -31.8396 |
| ZINC41655216 | -41.1655 |
| ZINC41658404 | -35.6643 |
| ZINC41658404 | -36.8725 |
| ZINC41687747 | -46.7696 |
| ZINC41774277 | -40.2571 |
| ZINC41818588 | -38.4536 |
| ZINC41847877 | -38.3627 |
| ZINC41893630 | -43.3622 |
| ZINC41909366 | -43.7895 |
| ZINC41941408 | -35.1755 |
| ZINC41941408 | -42.6415 |
| ZINC41952396 | -25.3358 |
| ZINC41952396 | -40.4557 |
| ZINC42078958 | -41.5622 |
| ZINC42092019 | -30.467  |
| ZINC42092658 | -45.2193 |
| ZINC42099887 | -40.6481 |
| ZINC42116249 | -38.8489 |
| ZINC42146854 | -38.8326 |
| ZINC42160809 | -38.842  |
| ZINC42181866 | -36.4576 |
| ZINC42203994 | -37.2317 |
| ZINC42203994 | -40.5777 |
| ZINC42208605 | -30.1508 |
| ZINC42208605 | -31.988  |
| ZINC42226965 | -29.2756 |
| ZINC42226965 | -34.2277 |
| ZINC42234311 | -33.2629 |
| ZINC42239858 | -36.4725 |
| ZINC42242776 | -42.1575 |
| ZINC42252291 | -45.2509 |
| ZINC42266607 | -38.1018 |
| ZINC42280052 | -44.2703 |
| ZINC42302765 | -49.7215 |
| ZINC42304843 | -49.6074 |
| ZINC42306476 | -45.5904 |
| ZINC42317918 | -36.4035 |
| ZINC42322541 | -43.7243 |
| ZINC42334484 | -33.3798 |
| ZINC42334484 | -39.8953 |

|              |          |
|--------------|----------|
| ZINC42335468 | -29.5739 |
| ZINC42335468 | -44.2313 |
| ZINC42353569 | -38.067  |
| ZINC42353569 | -40.9755 |
| ZINC42355797 | -37.5994 |
| ZINC42355797 | -45.16   |
| ZINC42363609 | -37.2853 |
| ZINC42365325 | -43.9264 |
| ZINC42366687 | -45.2336 |
| ZINC42379258 | -50.6442 |
| ZINC42381903 | -44.714  |
| ZINC42382232 | -48.3156 |
| ZINC42386248 | -40.5133 |
| ZINC42390322 | -30.1046 |
| ZINC42390322 | -30.6422 |
| ZINC42398499 | -40.7853 |
| ZINC42398640 | -41.8481 |
| ZINC42470476 | -44.6464 |
| ZINC42508749 | -40.2727 |
| ZINC42534308 | -38.4749 |
| ZINC42536149 | -35.7717 |
| ZINC42536149 | -41.1133 |
| ZINC42566353 | -39.1594 |
| ZINC42575518 | -37.762  |
| ZINC42625895 | -37.0213 |
| ZINC42657521 | -37.2787 |
| ZINC42660568 | -42.202  |
| ZINC42664875 | -46.8819 |
| ZINC42678240 | -41.8249 |
| ZINC42696802 | -50.7624 |
| ZINC42696812 | -42.8657 |
| ZINC42710543 | -36.2437 |
| ZINC42710543 | -41.6021 |
| ZINC42721677 | -37.0142 |
| ZINC42756153 | -36.1547 |
| ZINC42838953 | -38.1885 |
| ZINC42840169 | -36.2732 |
| ZINC42840169 | -40.8326 |
| ZINC42840419 | -46.1831 |
| ZINC42845687 | -38.4701 |
| ZINC42847797 | -45.2581 |
| ZINC42898198 | -38.5525 |
| ZINC42911496 | -37.2517 |
| ZINC42911496 | -40.5328 |

|              |          |
|--------------|----------|
| ZINC42923247 | -48.0718 |
| ZINC42935367 | -38.5627 |
| ZINC42950286 | -43.9268 |
| ZINC42950286 | -44.985  |
| ZINC42962345 | -41.8583 |
| ZINC42975703 | -36.5195 |
| ZINC42975703 | -40.7185 |
| ZINC42978342 | -37.2301 |
| ZINC42978342 | -38.4773 |
| ZINC42979179 | -32.821  |
| ZINC43044489 | -35.7408 |
| ZINC43105702 | -34.5389 |
| ZINC43107213 | -42.0473 |
| ZINC43133710 | -44.0021 |
| ZINC43144167 | -41.9677 |
| ZINC43144167 | -42.2042 |
| ZINC43160948 | -40.8221 |
| ZINC43162517 | -39.1195 |
| ZINC43182791 | -40.1558 |
| ZINC43272467 | -41.5879 |
| ZINC43272486 | -43.1355 |
| ZINC43275794 | -39.615  |
| ZINC43329041 | -44.526  |
| ZINC43454907 | -46.1368 |
| ZINC43474952 | -36.1598 |
| ZINC43475341 | -43.5625 |
| ZINC43527580 | -35.8146 |
| ZINC43534032 | -45.0509 |
| ZINC43537531 | -30.2161 |
| ZINC43574918 | -39.1513 |
| ZINC43579355 | -36.1863 |
| ZINC43585088 | -41.6    |
| ZINC43593098 | -40.4393 |
| ZINC43593098 | -40.4679 |
| ZINC43607756 | -34.5509 |
| ZINC43620241 | -37.1074 |
| ZINC43629983 | -46.4783 |
| ZINC43630718 | -34.8819 |
| ZINC43721217 | -40.055  |
| ZINC43730466 | -27.9945 |
| ZINC43732513 | -32.2468 |
| ZINC43735934 | -32.5091 |
| ZINC43736817 | -46.3492 |
| ZINC43737181 | -32.7128 |

|              |          |
|--------------|----------|
| ZINC43746969 | -38.6257 |
| ZINC43746969 | -52.8905 |
| ZINC43762344 | -37.7417 |
| ZINC43762464 | -32.0415 |
| ZINC43762768 | -36.0949 |
| ZINC43766844 | -35.8179 |
| ZINC43785088 | -37.0966 |
| ZINC43828444 | -31.5097 |
| ZINC43832822 | -42.0592 |
| ZINC43867084 | -32.995  |
| ZINC43874169 | -42.286  |
| ZINC43875491 | -43.1177 |
| ZINC43879480 | -45.5598 |
| ZINC43954262 | -32.5481 |
| ZINC43963874 | -37.191  |
| ZINC43972309 | -45.4568 |
| ZINC43972514 | -47.6862 |
| ZINC43973021 | -41.0831 |
| ZINC43983499 | -48.0278 |
| ZINC43990524 | -51.8253 |
| ZINC44001701 | -48.8748 |
| ZINC44002019 | -48.9072 |
| ZINC44002155 | -46.9988 |
| ZINC44002196 | -37.9331 |
| ZINC44023845 | -47.476  |
| ZINC44035093 | -36.5684 |
| ZINC44038301 | -52.5308 |
| ZINC44041312 | -43.5881 |
| ZINC44076173 | -30.6839 |
| ZINC44120534 | -25.4884 |
| ZINC44136108 | -35.0625 |
| ZINC44136143 | -25.7821 |
| ZINC44137833 | -38.6163 |
| ZINC44137833 | -41.8027 |
| ZINC44137967 | -35.0848 |
| ZINC44141560 | -43.8055 |
| ZINC44158674 | -44.3138 |
| ZINC44166833 | -27.8935 |
| ZINC44248567 | -29.611  |
| ZINC44250302 | -24.9246 |
| ZINC44267461 | -32.8472 |
| ZINC44302725 | -40.5848 |
| ZINC44304853 | -47.6402 |
| ZINC44316468 | -38.8548 |

|              |          |
|--------------|----------|
| ZINC44317365 | -35.6954 |
| ZINC44324559 | -44.5934 |
| ZINC44349237 | -43.8303 |
| ZINC44390786 | -46.0268 |
| ZINC44390838 | -27.3673 |
| ZINC44391110 | -44.4357 |
| ZINC44396384 | -40.606  |
| ZINC44440962 | -44.0072 |
| ZINC44443647 | -36.1412 |
| ZINC44443647 | -46.9456 |
| ZINC44444206 | -37.9512 |
| ZINC44444266 | -37.5321 |
| ZINC44449239 | -38.4824 |
| ZINC44449631 | -31.4289 |
| ZINC44452686 | -40.2921 |
| ZINC44457310 | -38.7994 |
| ZINC44477644 | -26.587  |
| ZINC44477644 | -33.7833 |
| ZINC44540131 | -32.056  |
| ZINC44540131 | -32.5084 |
| ZINC44542198 | -30.694  |
| ZINC44542198 | -39.805  |
| ZINC44548149 | -39.3854 |
| ZINC44548284 | -34.5976 |
| ZINC44551051 | -39.9105 |
| ZINC44551200 | -41.8958 |
| ZINC44551200 | -45.3558 |
| ZINC44565754 | -47.3232 |
| ZINC44567772 | -39.0494 |
| ZINC44571925 | -47.1969 |
| ZINC44585864 | -39.9749 |
| ZINC44637348 | -31.0235 |
| ZINC44638922 | -41.6598 |
| ZINC44641255 | -36.0985 |
| ZINC44642512 | -40.0251 |
| ZINC44642655 | -35.0967 |
| ZINC44642912 | -37.6981 |
| ZINC44697008 | -39.9206 |
| ZINC44722231 | -47.0824 |
| ZINC44722869 | -41.3506 |
| ZINC44738664 | -38.8268 |
| ZINC44757974 | -38.7209 |
| ZINC44778873 | -41.1962 |
| ZINC44789658 | -40.6384 |

|              |          |
|--------------|----------|
| ZINC44804308 | -40.1709 |
| ZINC44829232 | -32.9493 |
| ZINC44831312 | -29.6235 |
| ZINC44858666 | -31.0256 |
| ZINC44861131 | -43.3254 |
| ZINC44867316 | -34.9555 |
| ZINC44867688 | -36.5491 |
| ZINC44870399 | -42.4983 |
| ZINC44889232 | -43.3902 |
| ZINC44889651 | -39.8615 |
| ZINC44895268 | -43.6097 |
| ZINC44913131 | -38.2777 |
| ZINC44913590 | -34.5174 |
| ZINC44915229 | -38.1957 |
| ZINC44947811 | -36.6108 |
| ZINC44948532 | -39.925  |
| ZINC44950717 | -40.4863 |
| ZINC44950717 | -46.511  |
| ZINC44954582 | -40.6394 |
| ZINC44975300 | -35.7485 |
| ZINC44975300 | -37.1924 |
| ZINC44978403 | -43.2666 |
| ZINC44989715 | -46.3941 |
| ZINC44991301 | -38.3761 |
| ZINC45013877 | -30.1783 |
| ZINC45026150 | -37.8769 |
| ZINC45028236 | -32.1911 |
| ZINC45071107 | -40.0982 |
| ZINC45071232 | -26.8979 |
| ZINC45071243 | -25.1137 |
| ZINC45076787 | -41.7637 |
| ZINC45102546 | -39.3475 |
| ZINC45110978 | -43.6204 |
| ZINC45126166 | -45.7933 |
| ZINC45152584 | -47.0464 |
| ZINC45154346 | -45.5591 |
| ZINC45154567 | -45.526  |
| ZINC45172525 | -38.7811 |
| ZINC45191755 | -36.1422 |
| ZINC45205790 | -34.5594 |
| ZINC45223618 | -51.0102 |
| ZINC45248687 | -34.1731 |
| ZINC45303710 | -35.8875 |
| ZINC45303710 | -38.2239 |

|              |          |
|--------------|----------|
| ZINC45307942 | -32.6493 |
| ZINC45307942 | -34.7875 |
| ZINC45354223 | -50.6176 |
| ZINC45415454 | -36.7875 |
| ZINC45447706 | -24.3808 |
| ZINC45520789 | -46.0174 |
| ZINC45522174 | -34.8776 |
| ZINC45526877 | -28.5888 |
| ZINC45526916 | -34.9632 |
| ZINC45526974 | -43.6282 |
| ZINC45536681 | -43.9615 |
| ZINC45537500 | -39.1416 |
| ZINC45537500 | -48.4668 |
| ZINC45571577 | -46.4406 |
| ZINC45572982 | -35.4002 |
| ZINC45572982 | -38.6023 |
| ZINC45573582 | -34.098  |
| ZINC45578678 | -38.6611 |
| ZINC45668706 | -39.5773 |
| ZINC45682738 | -33.6287 |
| ZINC45682738 | -33.6289 |
| ZINC45712481 | -48.8145 |
| ZINC45723182 | -38.4138 |
| ZINC45723455 | -34.2121 |
| ZINC45749779 | -32.5637 |
| ZINC45749779 | -33.3041 |
| ZINC45753030 | -37.2329 |
| ZINC45787000 | -26.2946 |
| ZINC45797015 | -38.4688 |
| ZINC45822228 | -34.9888 |
| ZINC45823055 | -41.5077 |
| ZINC45824277 | -32.2926 |
| ZINC45824277 | -40.4806 |
| ZINC45851855 | -33.8349 |
| ZINC45858055 | -35.3796 |
| ZINC45869521 | -42.7361 |
| ZINC45888750 | -39.1675 |
| ZINC45908312 | -41.2815 |
| ZINC45921325 | -43.7479 |
| ZINC45924654 | -43.6425 |
| ZINC45928436 | -23.9621 |
| ZINC45942690 | -33.0308 |
| ZINC45944551 | -40.3141 |
| ZINC45944783 | -40.6716 |



|              |          |
|--------------|----------|
| ZINC45947823 | -33.6361 |
| ZINC45947823 | -36.3289 |
| ZINC45950359 | -37.7213 |
| ZINC45954285 | -42.9857 |
| ZINC45957038 | -35.1106 |
| ZINC45957038 | -41.9717 |
| ZINC45958705 | -43.8768 |
| ZINC45958983 | -32.4285 |
| ZINC45998219 | -34.3106 |
| ZINC45999083 | -37.0943 |
| ZINC46007435 | -32.5649 |
| ZINC46007435 | -43.1533 |
| ZINC46012058 | -40.9103 |
| ZINC46017444 | -41.6235 |
| ZINC46022675 | -43.0591 |
| ZINC46030045 | -33.9697 |
| ZINC46031291 | -49.0303 |
| ZINC46053270 | -45.1639 |
| ZINC46053270 | -45.5789 |
| ZINC46054573 | -39.9861 |
| ZINC46075870 | -39.0476 |
| ZINC46079166 | -33.5333 |
| ZINC46083525 | -46.075  |
| ZINC46083947 | -46.1282 |
| ZINC46087714 | -41.7899 |
| ZINC46087958 | -33.0298 |
| ZINC46087958 | -33.9896 |
| ZINC46091144 | -35.5688 |
| ZINC46116196 | -39.283  |
| ZINC46125111 | -40.7533 |
| ZINC46125436 | -30.1294 |
| ZINC46125436 | -41.0544 |
| ZINC46130358 | -41.7689 |
| ZINC46130904 | -40.6578 |
| ZINC46132700 | -39.4645 |
| ZINC46133343 | -33.6063 |
| ZINC46138574 | -39.8433 |
| ZINC46146134 | -44.403  |
| ZINC46154489 | -40.7759 |
| ZINC46159410 | -38.0048 |
| ZINC46172049 | -36.6385 |
| ZINC46172675 | -36.913  |
| ZINC46172890 | -42.2572 |
| ZINC46173400 | -37.6182 |

|              |          |
|--------------|----------|
| ZINC46173578 | -39.401  |
| ZINC46173630 | -45.9284 |
| ZINC46269641 | -33.9784 |
| ZINC46269641 | -36.7466 |
| ZINC46269641 | -40.3852 |
| ZINC46269641 | -43.6832 |
| ZINC46272302 | -41.9362 |
| ZINC46329879 | -39.3228 |
| ZINC46353854 | -39.5468 |
| ZINC46364613 | -46.9468 |
| ZINC46419007 | -44.3973 |
| ZINC46444043 | -48.3948 |
| ZINC46477403 | -32.3219 |
| ZINC46477403 | -36.9843 |
| ZINC46484651 | -46.572  |
| ZINC46502576 | -35.7278 |
| ZINC46502576 | -36.0247 |
| ZINC46502754 | -39.0793 |
| ZINC46594137 | -38.4256 |
| ZINC46648475 | -43.5341 |
| ZINC46654557 | -31.9979 |
| ZINC46665977 | -43.7527 |
| ZINC46708969 | -49.3017 |
| ZINC46708974 | -48.5818 |
| ZINC46744180 | -42.0764 |
| ZINC46813708 | -35.3831 |
| ZINC46826409 | -41.2319 |
| ZINC46858232 | -40.0511 |
| ZINC46869015 | -45.7336 |
| ZINC46909027 | -32.1131 |
| ZINC46913863 | -46.0914 |
| ZINC46914225 | -23.1826 |
| ZINC46914225 | -32.6366 |
| ZINC46914383 | -33.9365 |
| ZINC46927160 | -49.4666 |
| ZINC46928082 | -46.7637 |
| ZINC46961317 | -35.7253 |
| ZINC46970719 | -26.1654 |
| ZINC46971163 | -37.6547 |
| ZINC46973253 | -28.0445 |
| ZINC46995479 | -46.1456 |
| ZINC47006484 | -44.3928 |
| ZINC47025451 | -44.6041 |
| ZINC47031424 | -33.9963 |

|              |          |
|--------------|----------|
| ZINC47042075 | -50.7731 |
| ZINC47086869 | -50.2953 |
| ZINC47131207 | -41.9179 |
| ZINC47131714 | -38.6576 |
| ZINC47132716 | -35.469  |
| ZINC47135111 | -43.881  |
| ZINC47135111 | -46.6479 |
| ZINC47145411 | -26.6416 |
| ZINC47202732 | -37.0928 |
| ZINC47202732 | -52.1896 |
| ZINC47240280 | -35.5131 |
| ZINC47266137 | -36.5379 |
| ZINC47295949 | -32.7509 |
| ZINC47321080 | -33.9412 |
| ZINC47324858 | -48.7177 |
| ZINC47350076 | -42.3011 |
| ZINC47350951 | -48.9471 |
| ZINC47355326 | -43.2775 |
| ZINC47374851 | -40.6835 |
| ZINC47374851 | -48.1956 |
| ZINC47403854 | -41.858  |
| ZINC47423866 | -45.6644 |
| ZINC47434002 | -45.9801 |
| ZINC47476498 | -42.8216 |
| ZINC47486634 | -31.7806 |
| ZINC47518123 | -42.2606 |
| ZINC47542589 | -45.5289 |
| ZINC47542732 | -45.5958 |
| ZINC47558319 | -45.5352 |
| ZINC47559418 | -34.4237 |
| ZINC47582254 | -37.7612 |
| ZINC47582254 | -45.7904 |
| ZINC47596585 | -39.9739 |
| ZINC47620437 | -40.9837 |
| ZINC47623463 | -38.3569 |
| ZINC47626768 | -47.4152 |
| ZINC47628445 | -39.7686 |
| ZINC47635887 | -36.1974 |
| ZINC47640385 | -42.4887 |
| ZINC47640890 | -37.6615 |
| ZINC47642295 | -38.8791 |
| ZINC47642634 | -43.1633 |
| ZINC47642975 | -31.4385 |
| ZINC47654362 | -38.8942 |

|              |          |
|--------------|----------|
| ZINC47655496 | -35.2306 |
| ZINC47658801 | -48.7482 |
| ZINC47662879 | -38.4865 |
| ZINC47665621 | -40.1085 |
| ZINC47667691 | -42.2556 |
| ZINC47668433 | -33.8857 |
| ZINC47668433 | -45.7162 |
| ZINC47713794 | -41.2385 |
| ZINC47752565 | -36.3123 |
| ZINC47752565 | -39.8759 |
| ZINC47783327 | -48.4327 |
| ZINC47783331 | -47.909  |
| ZINC47784731 | -42.9124 |
| ZINC47798732 | -38.3859 |
| ZINC47807097 | -38.7157 |
| ZINC47822426 | -33.6328 |
| ZINC47830287 | -43.5013 |
| ZINC47832690 | -40.7674 |
| ZINC47844988 | -35.8781 |
| ZINC47859929 | -36.1114 |
| ZINC47859929 | -37.652  |
| ZINC47872439 | -29.0024 |
| ZINC47872439 | -40.2425 |
| ZINC47889135 | -39.6977 |
| ZINC47895897 | -37.491  |
| ZINC47915947 | -33.3571 |
| ZINC47923619 | -36.2705 |
| ZINC47940034 | -41.527  |
| ZINC47940255 | -39.0329 |
| ZINC47940293 | -35.9284 |
| ZINC47943212 | -35.4129 |
| ZINC47965352 | -34.4235 |
| ZINC47971961 | -45.5195 |
| ZINC47976627 | -47.775  |
| ZINC47979744 | -32.5084 |
| ZINC47981174 | -35.7033 |
| ZINC47981174 | -37.5898 |
| ZINC47981804 | -35.755  |
| ZINC48025186 | -37.5031 |
| ZINC48025840 | -33.8829 |
| ZINC48033066 | -54.4658 |
| ZINC48049931 | -38.8777 |
| ZINC48050088 | -43.2317 |
| ZINC48050302 | -42.6122 |

|              |          |
|--------------|----------|
| ZINC48082578 | -39.7725 |
| ZINC48082578 | -50.4755 |
| ZINC48088024 | -37.3906 |
| ZINC48133649 | -41.4858 |
| ZINC48133649 | -43.7752 |
| ZINC48135263 | -42.049  |
| ZINC48166320 | -43.1987 |
| ZINC48170779 | -33.2506 |
| ZINC48186732 | -37.522  |
| ZINC48194480 | -41.0801 |
| ZINC48229906 | -39.3806 |
| ZINC48235431 | -36.4716 |
| ZINC48251548 | -37.1654 |
| ZINC48252961 | -48.1575 |
| ZINC48254023 | -32.3056 |
| ZINC48254061 | -35.9907 |
| ZINC48265392 | -34.0059 |
| ZINC48268719 | -38.2702 |
| ZINC48275726 | -45.9583 |
| ZINC48278878 | -38.5423 |
| ZINC48288601 | -39.7767 |
| ZINC48300893 | -34.7778 |
| ZINC48303478 | -42.2171 |
| ZINC48304336 | -41.0154 |
| ZINC48308567 | -40.8844 |
| ZINC48309058 | -39.5955 |
| ZINC48310511 | -30.3721 |
| ZINC48331546 | -37.8969 |
| ZINC48333129 | -41.4147 |
| ZINC48345239 | -38.656  |
| ZINC48352925 | -47.3634 |
| ZINC48363285 | -39.3402 |
| ZINC48366937 | -45.5296 |
| ZINC48366937 | -45.5296 |
| ZINC48369619 | -38.7527 |
| ZINC48388759 | -37.6341 |
| ZINC48393026 | -33.9423 |
| ZINC48393243 | -34.8847 |
| ZINC48393243 | -35.6327 |
| ZINC48394049 | -47.2163 |
| ZINC48408394 | -43.609  |
| ZINC48414852 | -47.3786 |
| ZINC48414852 | -47.896  |
| ZINC48417706 | -44.5634 |

|              |          |
|--------------|----------|
| ZINC48434033 | -36.4418 |
| ZINC48452213 | -46.8562 |
| ZINC48461260 | -43.8602 |
| ZINC48461328 | -49.9071 |
| ZINC48467894 | -41.1878 |
| ZINC48473475 | -45.6364 |
| ZINC48474592 | -38.5913 |
| ZINC48494635 | -43.7835 |
| ZINC48497289 | -55.6041 |
| ZINC48501928 | -37.8594 |
| ZINC48501982 | -36.8485 |
| ZINC48503846 | -50.877  |
| ZINC48504015 | -51.7038 |
| ZINC48511857 | -45.3057 |
| ZINC48519566 | -44.9671 |
| ZINC48519758 | -42.7123 |
| ZINC48519801 | -41.5965 |
| ZINC48520547 | -41.0462 |
| ZINC48520547 | -41.0971 |
| ZINC48532805 | -48.3294 |
| ZINC48568596 | -45.1548 |
| ZINC48569017 | -41.5666 |
| ZINC48569599 | -40.7187 |
| ZINC48569990 | -49.7943 |
| ZINC48580435 | -42.4091 |
| ZINC48586849 | -41.2649 |
| ZINC48587066 | -34.6179 |
| ZINC48593514 | -37.3458 |
| ZINC48603000 | -37.0266 |
| ZINC48603006 | -40.6188 |
| ZINC48603252 | -39.2142 |
| ZINC48603527 | -37.8256 |
| ZINC48609306 | -42.8113 |
| ZINC48615176 | -38.0071 |
| ZINC48617028 | -45.5554 |
| ZINC48629608 | -36.7734 |
| ZINC48635080 | -47.3092 |
| ZINC48635134 | -43.9374 |
| ZINC48642468 | -43.6035 |
| ZINC48657991 | -34.1015 |
| ZINC48658142 | -41.4908 |
| ZINC48658303 | -43.5143 |
| ZINC48686171 | -41.243  |
| ZINC48694433 | -39.0149 |

|              |          |
|--------------|----------|
| ZINC48696064 | -34.9101 |
| ZINC48697993 | -42.9898 |
| ZINC48703598 | -39.1088 |
| ZINC48706076 | -41.1025 |
| ZINC48706556 | -34.4321 |
| ZINC48706610 | -34.5133 |
| ZINC48712057 | -37.841  |
| ZINC48715232 | -39.6536 |
| ZINC48715232 | -45.8617 |
| ZINC48773474 | -33.1892 |
| ZINC48806747 | -38.2208 |
| ZINC48808853 | -39.3893 |
| ZINC48872748 | -43.3013 |
| ZINC48875156 | -38.7444 |
| ZINC48909968 | -46.6986 |
| ZINC48984561 | -37.0159 |
| ZINC49006361 | -37.7441 |
| ZINC49022881 | -47.7265 |
| ZINC49028727 | -43.0768 |
| ZINC49044757 | -41.0591 |
| ZINC49049867 | -41.7246 |
| ZINC49049867 | -43.6268 |
| ZINC49059551 | -45.0123 |
| ZINC49065647 | -37.106  |
| ZINC49065648 | -31.2666 |
| ZINC49077867 | -39.2182 |
| ZINC49091086 | -35.2315 |
| ZINC49092346 | -39.4445 |
| ZINC49092346 | -40.5497 |
| ZINC49101572 | -37.1096 |
| ZINC49102440 | -37.1545 |
| ZINC49170697 | -28.4736 |
| ZINC49208094 | -36.6294 |
| ZINC49314199 | -33.127  |
| ZINC49318579 | -35.6852 |
| ZINC49318999 | -38.2186 |
| ZINC49321655 | -42.0755 |
| ZINC49331900 | -33.5428 |
| ZINC49365626 | -39.664  |
| ZINC49377444 | -53.9035 |
| ZINC49394357 | -35.3709 |
| ZINC49396237 | -42.5481 |
| ZINC49398727 | -40.1877 |
| ZINC49402108 | -36.7531 |

|              |          |
|--------------|----------|
| ZINC49402138 | -26.9657 |
| ZINC49402695 | -34.6092 |
| ZINC49402997 | -28.6685 |
| ZINC49410377 | -38.1062 |
| ZINC49410664 | -42.9375 |
| ZINC49410765 | -33.204  |
| ZINC49411048 | -43.7171 |
| ZINC49412312 | -47.7318 |
| ZINC49425892 | -40.7775 |
| ZINC49431003 | -47.9977 |
| ZINC49431951 | -36.5323 |
| ZINC49432542 | -51.736  |
| ZINC49432551 | -34.3653 |
| ZINC49442769 | -32.5879 |
| ZINC49442821 | -35.9299 |
| ZINC49442821 | -36.4906 |
| ZINC49449736 | -46.0975 |
| ZINC49456054 | -53.0718 |
| ZINC49456702 | -42.8534 |
| ZINC49461402 | -43.9968 |
| ZINC49463295 | -36.6239 |
| ZINC49466525 | -39.0232 |
| ZINC49473186 | -38.8271 |
| ZINC49475233 | -39.0993 |
| ZINC49477668 | -40.3119 |
| ZINC49478277 | -38.8093 |
| ZINC49521661 | -38.7901 |
| ZINC49521997 | -39.1186 |
| ZINC49522004 | -40.8495 |
| ZINC49524506 | -38.1196 |
| ZINC49543940 | -36.4304 |
| ZINC49545177 | -41.5499 |
| ZINC49548663 | -42.3031 |
| ZINC49549102 | -36.6409 |
| ZINC49549102 | -40.8165 |
| ZINC49549648 | -55.7991 |
| ZINC49550398 | -36.7051 |
| ZINC49588566 | -26.1339 |
| ZINC49620968 | -40.1417 |
| ZINC49669410 | -39.2568 |
| ZINC49674761 | -43.9449 |
| ZINC49697894 | -30.0556 |
| ZINC49697894 | -47.6673 |
| ZINC49753220 | -36.7566 |



|              |          |
|--------------|----------|
| ZINC49797771 | -39.2839 |
| ZINC49797771 | -45.0191 |
| ZINC49918886 | -30.1564 |
| ZINC49941920 | -38.7082 |
| ZINC49943218 | -38.4732 |
| ZINC49969716 | -34.9895 |
| ZINC49969716 | -43.6624 |
| ZINC49973644 | -39.9931 |
| ZINC50003678 | -46.5969 |
| ZINC50081702 | -37.8215 |
| ZINC50091986 | -32.808  |
| ZINC50141701 | -30.954  |
| ZINC50242441 | -34.0592 |
| ZINC50275524 | -42.3323 |
| ZINC50275524 | -47.8825 |
| ZINC50360796 | -46.5273 |
| ZINC50451130 | -44.3404 |
| ZINC50683524 | -34.0964 |
| ZINC50729711 | -41.3515 |
| ZINC50740219 | -41.7809 |
| ZINC50901242 | -32.3034 |
| ZINC50901242 | -35.7887 |
| ZINC50985565 | -42.5148 |
| ZINC50985565 | -45.8299 |
| ZINC50997889 | -32.7945 |
| ZINC51002155 | -36.6403 |
| ZINC51087444 | -36.6836 |
| ZINC51087444 | -42.9415 |
| ZINC51134798 | -37.0234 |
| ZINC51182214 | -31.3552 |
| ZINC51182728 | -38.3044 |
| ZINC51182728 | -42.5738 |
| ZINC51210524 | -39.3421 |
| ZINC51231017 | -38.7003 |
| ZINC51326087 | -45.9726 |
| ZINC51347679 | -40.1358 |
| ZINC51347679 | -47.9993 |
| ZINC51351073 | -39.5094 |
| ZINC51417985 | -46.8514 |
| ZINC51421499 | -33.6034 |
| ZINC51421499 | -34.0916 |
| ZINC51421973 | -24.3892 |
| ZINC51449491 | -51.2182 |
| ZINC51498980 | -38.013  |

|              |          |
|--------------|----------|
| ZINC51501008 | -35.5921 |
| ZINC51531544 | -38.5922 |
| ZINC51531951 | -46.9309 |
| ZINC51532103 | -41.7587 |
| ZINC51624541 | -59.0052 |
| ZINC51739085 | -42.484  |
| ZINC51764036 | -33.7463 |
| ZINC51764036 | -35.0441 |
| ZINC51843688 | -50.3274 |
| ZINC51852669 | -40.4548 |
| ZINC51872715 | -33.4221 |
| ZINC51960458 | -44.8235 |
| ZINC52017900 | -36.2199 |
| ZINC52041670 | -41.3175 |
| ZINC52041670 | -47.3837 |
| ZINC52044531 | -36.4689 |
| ZINC52044531 | -43.1449 |
| ZINC52048982 | -37.5892 |
| ZINC52048982 | -44.3517 |
| ZINC52084315 | -39.2745 |
| ZINC52103131 | -32.6457 |
| ZINC52103131 | -35.2005 |
| ZINC52105448 | -41.116  |
| ZINC52161210 | -34.4888 |
| ZINC52161210 | -35.7269 |
| ZINC52161699 | -30.4416 |
| ZINC52161699 | -32.1393 |
| ZINC52163783 | -35.0323 |
| ZINC52166336 | -46.5481 |
| ZINC52214308 | -37.2261 |
| ZINC52214308 | -42.467  |
| ZINC52282585 | -42.4661 |
| ZINC52282830 | -43.8385 |
| ZINC52337609 | -52.8573 |
| ZINC52355843 | -40.6291 |
| ZINC52362195 | -36.9969 |
| ZINC52399132 | -45.9584 |
| ZINC52418491 | -33.9308 |
| ZINC52418491 | -34.2136 |
| ZINC52425829 | -38.0133 |
| ZINC52436073 | -38.4215 |
| ZINC52458244 | -34.6139 |
| ZINC52489017 | -47.8214 |
| ZINC52493000 | -41.2886 |

|              |          |
|--------------|----------|
| ZINC52535339 | -28.9007 |
| ZINC52535339 | -34.059  |
| ZINC52582437 | -51.4542 |
| ZINC52662483 | -38.1487 |
| ZINC52712319 | -36.3056 |
| ZINC52712319 | -44.9255 |
| ZINC52746994 | -37.1197 |
| ZINC52754036 | -38.7315 |
| ZINC52779667 | -42.5555 |
| ZINC52801508 | -30.8418 |
| ZINC52803298 | -44.1498 |
| ZINC52816654 | -33.8477 |
| ZINC52816654 | -36.2382 |
| ZINC52819979 | -34.7902 |
| ZINC52928949 | -38.9854 |
| ZINC52954562 | -43.0182 |
| ZINC52966325 | -44.0768 |
| ZINC53016515 | -49.4956 |
| ZINC53017147 | -34.2899 |
| ZINC53017147 | -40.1178 |
| ZINC53065360 | -29.3957 |
| ZINC53094923 | -35.6548 |
| ZINC53094923 | -39.9043 |
| ZINC53184133 | -32.2507 |
| ZINC53184133 | -37.9862 |
| ZINC53185155 | -47.778  |
| ZINC53208480 | -41.7932 |
| ZINC53299316 | -44.3563 |
| ZINC53330471 | -40.1457 |
| ZINC53406243 | -46.9064 |
| ZINC53406243 | -50.084  |
| ZINC53414552 | -28.9675 |
| ZINC53419796 | -38.8076 |
| ZINC53419796 | -47.0537 |
| ZINC53421749 | -37.2913 |
| ZINC53457072 | -30.2229 |
| ZINC53506935 | -48.6445 |
| ZINC53506935 | -49.9246 |
| ZINC53526759 | -36.8036 |
| ZINC53537953 | -40.5036 |
| ZINC53549825 | -45.1537 |
| ZINC53603719 | -38.6942 |
| ZINC53603719 | -40.9344 |
| ZINC53679774 | -41.7325 |

|              |          |
|--------------|----------|
| ZINC53681137 | -38.9186 |
| ZINC53681137 | -41.2733 |
| ZINC53745968 | -45.3704 |
| ZINC53754153 | -39.7021 |
| ZINC53759660 | -38.7769 |
| ZINC53775862 | -49.1077 |
| ZINC53781706 | -37.5554 |
| ZINC53790108 | -37.0253 |
| ZINC53815025 | -35.1524 |
| ZINC53815025 | -36.8447 |
| ZINC53835022 | -44.2669 |
| ZINC53835725 | -30.7143 |
| ZINC53835953 | -36.8313 |
| ZINC53837794 | -43.0898 |
| ZINC53841005 | -37.67   |
| ZINC53906878 | -40.001  |
| ZINC53945815 | -34.9641 |
| ZINC53994619 | -40.8215 |
| ZINC54000820 | -42.4846 |
| ZINC54016291 | -47.2397 |
| ZINC54017163 | -41.4919 |
| ZINC54039614 | -41.2904 |
| ZINC54041422 | -41.8479 |
| ZINC54042509 | -34.0506 |
| ZINC54058503 | -39.7149 |
| ZINC54072974 | -31.6359 |
| ZINC54092476 | -42.7038 |
| ZINC54116808 | -41.3126 |
| ZINC54131269 | -41.6972 |
| ZINC54137002 | -39.7802 |
| ZINC54144946 | -36.0817 |
| ZINC54150197 | -39.0374 |
| ZINC54151504 | -36.0177 |
| ZINC54152482 | -41.7031 |
| ZINC54168133 | -40.1339 |
| ZINC54175294 | -50.5373 |
| ZINC54209331 | -40.2918 |
| ZINC54215339 | -33.5745 |
| ZINC54215339 | -39.2707 |
| ZINC54229150 | -43.2395 |
| ZINC54229755 | -40.2735 |
| ZINC54229946 | -46.974  |
| ZINC54230770 | -45.8371 |
| ZINC54234915 | -46.5335 |

|              |          |
|--------------|----------|
| ZINC54253442 | -32.2113 |
| ZINC54255777 | -34.5558 |
| ZINC54313660 | -40.1373 |
| ZINC54320232 | -49.3107 |
| ZINC54320853 | -46.457  |
| ZINC54321639 | -50.455  |
| ZINC54322078 | -43.9459 |
| ZINC54358602 | -40.278  |
| ZINC54358899 | -33.0103 |
| ZINC54360344 | -30.1067 |
| ZINC54360676 | -29.8432 |
| ZINC54361117 | -47.7848 |
| ZINC54363517 | -35.0624 |
| ZINC54368750 | -38.892  |
| ZINC54368750 | -46.3442 |
| ZINC54395718 | -34.8524 |
| ZINC54410510 | -41.9206 |
| ZINC54501145 | -42.1967 |
| ZINC54514849 | -37.247  |
| ZINC54537335 | -22.0963 |
| ZINC54537335 | -28.309  |
| ZINC54549196 | -33.9047 |
| ZINC54549196 | -41.694  |
| ZINC54550416 | -35.6408 |
| ZINC54550416 | -38.6269 |
| ZINC54551368 | -31.1607 |
| ZINC54551368 | -34.1863 |
| ZINC54570954 | -38.7806 |
| ZINC54570954 | -44.7312 |
| ZINC54613061 | -37.5466 |
| ZINC54614161 | -33.5925 |
| ZINC54619777 | -29.2787 |
| ZINC54620536 | -39.7273 |
| ZINC54672248 | -33.0789 |
| ZINC54807580 | -40.7203 |
| ZINC54811891 | -35.3432 |
| ZINC54827594 | -50.1204 |
| ZINC54913087 | -38.7309 |
| ZINC54939483 | -44.6216 |
| ZINC54939483 | -48.0741 |
| ZINC54977871 | -42.517  |
| ZINC54977871 | -43.6337 |
| ZINC55006211 | -33.5801 |
| ZINC55006211 | -35.546  |

|              |          |
|--------------|----------|
| ZINC55009905 | -39.9273 |
| ZINC55037313 | -34.0512 |
| ZINC55072147 | -34.8562 |
| ZINC55076261 | -34.723  |
| ZINC55078384 | -45.4333 |
| ZINC55090830 | -39.3003 |
| ZINC55090965 | -43.3951 |
| ZINC55102953 | -37.5649 |
| ZINC55107863 | -38.8927 |
| ZINC55109144 | -23.1076 |
| ZINC55109144 | -30.2139 |
| ZINC55111846 | -45.5368 |
| ZINC55120493 | -38.9986 |
| ZINC55132917 | -37.8792 |
| ZINC55146941 | -41.0955 |
| ZINC55146941 | -48.2839 |
| ZINC55147710 | -47.5636 |
| ZINC55148617 | -39.0549 |
| ZINC55148617 | -43.7419 |
| ZINC55149503 | -43.5423 |
| ZINC55154185 | -32.35   |
| ZINC55157667 | -40.6766 |
| ZINC55166873 | -35.0766 |
| ZINC55179245 | -40.6317 |
| ZINC55179626 | -47.6607 |
| ZINC55179626 | -49.4508 |
| ZINC55180250 | -32.5196 |
| ZINC55181923 | -32.8805 |
| ZINC55183084 | -53.8816 |
| ZINC55185466 | -41.7052 |
| ZINC55195970 | -40.7585 |
| ZINC55195970 | -43.1323 |
| ZINC55210083 | -39.8575 |
| ZINC55214134 | -38.6027 |
| ZINC55215530 | -38.6059 |
| ZINC55219280 | -40.3806 |
| ZINC55219280 | -44.0276 |
| ZINC55253441 | -34.674  |
| ZINC55255938 | -35.8349 |
| ZINC55255938 | -37.6069 |
| ZINC55278978 | -38.3004 |
| ZINC55281661 | -27.932  |
| ZINC55307118 | -49.3985 |
| ZINC55310586 | -38.8763 |

|              |          |
|--------------|----------|
| ZINC55327772 | -37.6573 |
| ZINC55329074 | -39.7391 |
| ZINC55337368 | -42.955  |
| ZINC55387277 | -31.6376 |
| ZINC55415082 | -42.1337 |
| ZINC55415833 | -43.0439 |
| ZINC55420326 | -48.5693 |
| ZINC55423166 | -42.2704 |
| ZINC55494260 | -37.3546 |
| ZINC55499059 | -43.7789 |
| ZINC55503532 | -39.7242 |
| ZINC55519632 | -29.4171 |
| ZINC55525746 | -30.822  |
| ZINC55525787 | -21.9038 |
| ZINC55544732 | -30.6177 |
| ZINC55544732 | -36.4548 |
| ZINC55558131 | -43.0232 |
| ZINC55565498 | -41.4858 |
| ZINC55568672 | -30.6844 |
| ZINC55574837 | -34.45   |
| ZINC55592272 | -44.4368 |
| ZINC55691332 | -29.0174 |
| ZINC55706833 | -40.4437 |
| ZINC55739355 | -32.7081 |
| ZINC55769730 | -41.4406 |
| ZINC55795994 | -34.5484 |
| ZINC55805699 | -39.7596 |
| ZINC55818997 | -34.0277 |
| ZINC55820109 | -44.7693 |
| ZINC55842663 | -38.3369 |
| ZINC55846027 | -34.4808 |
| ZINC55866930 | -39.2657 |
| ZINC55900792 | -43.9222 |
| ZINC55942339 | -38.0437 |
| ZINC55942592 | -39.4546 |
| ZINC55942622 | -30.7694 |
| ZINC55947291 | -33.1482 |
| ZINC55972109 | -39.2678 |
| ZINC55985245 | -41.056  |
| ZINC56000948 | -40.0878 |
| ZINC56025784 | -45.2028 |
| ZINC56034382 | -44.1055 |
| ZINC56036735 | -40.5984 |
| ZINC56043375 | -43.3606 |

|              |          |
|--------------|----------|
| ZINC56044390 | -37.3059 |
| ZINC56044390 | -43.2671 |
| ZINC56054963 | -24.9078 |
| ZINC56054963 | -34.5961 |
| ZINC56068050 | -39.7108 |
| ZINC56068050 | -42.6651 |
| ZINC56068127 | -44.0374 |
| ZINC56087080 | -43.7101 |
| ZINC56090194 | -40.8113 |
| ZINC56144810 | -40.3781 |
| ZINC56154333 | -45.1106 |
| ZINC56164266 | -37.2495 |
| ZINC56164266 | -41.7517 |
| ZINC56207305 | -37.9787 |
| ZINC56231571 | -45.218  |
| ZINC56244115 | -44.4926 |
| ZINC56304803 | -32.3464 |
| ZINC56342220 | -34.6567 |
| ZINC56350814 | -42.1581 |
| ZINC56365517 | -43.9448 |
| ZINC56369708 | -46.4787 |
| ZINC56370726 | -37.6885 |
| ZINC56372409 | -33.1781 |
| ZINC56397996 | -42.2324 |
| ZINC56401890 | -36.9813 |
| ZINC56454079 | -40.668  |
| ZINC56485572 | -42.8392 |
| ZINC56485572 | -43.8311 |
| ZINC56511184 | -41.8239 |
| ZINC56511295 | -44.6016 |
| ZINC56513173 | -49.0762 |
| ZINC56533983 | -45.6083 |
| ZINC56552750 | -25.0526 |
| ZINC56552750 | -31.0078 |
| ZINC56575876 | -38.6631 |
| ZINC56594379 | -50.3743 |
| ZINC56605400 | -43.5035 |
| ZINC56662708 | -40.7539 |
| ZINC56677880 | -39.7218 |
| ZINC56718673 | -42.7564 |
| ZINC56721556 | -45.6304 |
| ZINC56721556 | -46.9386 |
| ZINC56723317 | -35.9064 |
| ZINC56739024 | -45.7649 |



|              |          |
|--------------|----------|
| ZINC56743515 | -40.1094 |
| ZINC56799085 | -39.4381 |
| ZINC56815736 | -41.7766 |
| ZINC56826645 | -30.7093 |
| ZINC56828797 | -42.7834 |
| ZINC56863874 | -38.6194 |
| ZINC56863874 | -43.6602 |
| ZINC56880330 | -41.3109 |
| ZINC56901058 | -40.6281 |
| ZINC56904884 | -42.556  |
| ZINC56905175 | -38.9756 |
| ZINC56905552 | -46.2829 |
| ZINC56905814 | -38.3985 |
| ZINC56906443 | -42.72   |
| ZINC56909594 | -43.6081 |
| ZINC56911685 | -43.7842 |
| ZINC56919753 | -44.9154 |
| ZINC56922137 | -32.3902 |
| ZINC56925520 | -44.0453 |
| ZINC57036433 | -47.7703 |
| ZINC57062542 | -44.5048 |
| ZINC57062542 | -46.1339 |
| ZINC57091791 | -39.1152 |
| ZINC57095907 | -42.1506 |
| ZINC57101262 | -35.6712 |
| ZINC57105440 | -26.9491 |
| ZINC57105440 | -27.3024 |
| ZINC57136402 | -45.4098 |
| ZINC57137537 | -34.3655 |
| ZINC57176053 | -32.6036 |
| ZINC57182516 | -41.0793 |
| ZINC57290225 | -48.0448 |
| ZINC57294225 | -32.2235 |
| ZINC57312103 | -34.4142 |
| ZINC57322937 | -44.7114 |
| ZINC57329960 | -33.2826 |
| ZINC57331498 | -38.2264 |
| ZINC57331498 | -39.8352 |
| ZINC57343683 | -37.5163 |
| ZINC57360222 | -28.9958 |
| ZINC57364705 | -50.4385 |
| ZINC57366973 | -34.5945 |
| ZINC57369707 | -36.857  |
| ZINC57369924 | -40.2227 |

|              |          |
|--------------|----------|
| ZINC57369924 | -42.4954 |
| ZINC57372411 | -38.0768 |
| ZINC57378278 | -37.931  |
| ZINC57378294 | -45.2694 |
| ZINC57380957 | -37.2434 |
| ZINC57423960 | -33.544  |
| ZINC57429351 | -41.2384 |
| ZINC57464615 | -43.2412 |
| ZINC57475043 | -43.3464 |
| ZINC57500287 | -37.2357 |
| ZINC57511594 | -41.4051 |
| ZINC57520275 | -35.3302 |
| ZINC57520784 | -44.9089 |
| ZINC57569874 | -40.4378 |
| ZINC57571023 | -41.526  |
| ZINC57589748 | -31.8589 |
| ZINC57622510 | -37.0462 |
| ZINC57622510 | -39.0057 |
| ZINC57622877 | -37.1629 |
| ZINC57622877 | -37.4016 |
| ZINC57650417 | -38.6531 |
| ZINC57659816 | -39.449  |
| ZINC57669581 | -28.5978 |
| ZINC57669581 | -31.1963 |
| ZINC57669589 | -25.9697 |
| ZINC57669589 | -34.8501 |
| ZINC57670275 | -35.9023 |
| ZINC57670275 | -37.4926 |
| ZINC57681524 | -42.1379 |
| ZINC57681836 | -33.654  |
| ZINC57682279 | -41.7068 |
| ZINC57710869 | -33.4052 |
| ZINC57710869 | -40.3569 |
| ZINC57731241 | -36.3899 |
| ZINC57731241 | -41.011  |
| ZINC57774428 | -34.6946 |
| ZINC57781427 | -35.9857 |
| ZINC57781427 | -48.0553 |
| ZINC57813821 | -31.5052 |
| ZINC57813821 | -35.0969 |
| ZINC57815639 | -39.882  |
| ZINC57836715 | -37.5762 |
| ZINC57885204 | -35.2129 |
| ZINC57885204 | -37.1755 |

|              |          |
|--------------|----------|
| ZINC57893542 | -36.3343 |
| ZINC57913931 | -43.1068 |
| ZINC57972859 | -38.7918 |
| ZINC57972859 | -41.0776 |
| ZINC57979033 | -36.8887 |
| ZINC57985475 | -38.2615 |
| ZINC57998461 | -29.804  |
| ZINC57998461 | -37.8363 |
| ZINC58010296 | -36.7183 |
| ZINC58061250 | -36.3734 |
| ZINC58061500 | -42.1605 |
| ZINC58061526 | -29.8469 |
| ZINC58068686 | -43.511  |
| ZINC58075464 | -34.9992 |
| ZINC58075464 | -39.6389 |
| ZINC58096186 | -41.3208 |
| ZINC58100826 | -33.5799 |
| ZINC58100826 | -34.2937 |
| ZINC58147663 | -33.6491 |
| ZINC58152597 | -37.2422 |
| ZINC58160453 | -42.7915 |
| ZINC58160453 | -44.5137 |
| ZINC58160570 | -29.2668 |
| ZINC58165421 | -42.8093 |
| ZINC58167242 | -39.7453 |
| ZINC58175417 | -45.8437 |
| ZINC58175476 | -33.8341 |
| ZINC58179942 | -34.4045 |
| ZINC58182848 | -41.6242 |
| ZINC58182848 | -44.4407 |
| ZINC58188475 | -48.85   |
| ZINC58192964 | -36.4106 |
| ZINC58201202 | -38.6902 |
| ZINC58206150 | -31.5251 |
| ZINC58209171 | -44.4179 |
| ZINC58209171 | -50.2234 |
| ZINC58217451 | -33.5577 |
| ZINC58224060 | -45.3268 |
| ZINC58225015 | -45.9007 |
| ZINC58225428 | -30.8236 |
| ZINC58226614 | -42.1472 |
| ZINC58236918 | -41.3277 |
| ZINC58244015 | -40.223  |
| ZINC58247535 | -36.3094 |

|              |          |
|--------------|----------|
| ZINC58264355 | -39.6094 |
| ZINC58265310 | -37.2153 |
| ZINC58265310 | -37.3605 |
| ZINC58268908 | -31.1717 |
| ZINC58271981 | -33.6596 |
| ZINC58279059 | -58.7883 |
| ZINC58281741 | -36.2016 |
| ZINC58283077 | -46.1862 |
| ZINC58292718 | -41.9799 |
| ZINC58297317 | -46.4015 |
| ZINC58300020 | -41.7371 |
| ZINC58305328 | -40.7703 |
| ZINC58313668 | -27.9733 |
| ZINC58315858 | -32.0472 |
| ZINC58316931 | -39.7393 |
| ZINC58316931 | -44.2794 |
| ZINC58321222 | -37.9456 |
| ZINC58328950 | -37.5705 |
| ZINC58328950 | -41.0111 |
| ZINC58330407 | -31.3052 |
| ZINC58330407 | -33.1959 |
| ZINC58341385 | -41.6828 |
| ZINC58342630 | -44.2168 |
| ZINC58343637 | -34.3782 |
| ZINC58343990 | -39.5739 |
| ZINC58343990 | -44.0097 |
| ZINC58354784 | -35.2886 |
| ZINC58358275 | -38.5932 |
| ZINC58358275 | -43.9679 |
| ZINC58370527 | -37.6297 |
| ZINC58392051 | -42.5016 |
| ZINC58393512 | -39.0054 |
| ZINC58426050 | -38.4944 |
| ZINC58465029 | -48.9022 |
| ZINC58491340 | -41.4953 |
| ZINC58521167 | -39.6884 |
| ZINC58540446 | -42.8007 |
| ZINC58540446 | -43.7274 |
| ZINC58576472 | -30.9926 |
| ZINC58593147 | -41.5203 |
| ZINC58602146 | -38.5955 |
| ZINC58610777 | -38.6349 |
| ZINC58619668 | -40.1293 |
| ZINC58701921 | -43.422  |

|              |          |
|--------------|----------|
| ZINC58754087 | -34.3638 |
| ZINC58754087 | -36.9697 |
| ZINC58789564 | -44.7886 |
| ZINC58800820 | -37.5165 |
| ZINC58830357 | -38.4445 |
| ZINC58874155 | -35.4561 |
| ZINC58886201 | -39.3621 |
| ZINC58902092 | -36.0852 |
| ZINC58902120 | -37.1312 |
| ZINC58930463 | -34.7354 |
| ZINC58941147 | -46.5645 |
| ZINC58949474 | -28.9609 |
| ZINC58949749 | -28.9996 |
| ZINC58949755 | -27.6133 |
| ZINC58950687 | -32.1498 |
| ZINC58953675 | -35.4051 |
| ZINC58953675 | -41.4795 |
| ZINC58999122 | -43.4363 |
| ZINC59041827 | -47.6143 |
| ZINC59041903 | -39.7094 |
| ZINC59092880 | -37.9698 |
| ZINC59106192 | -36.6212 |
| ZINC59114067 | -38.8907 |
| ZINC59114140 | -32.1005 |
| ZINC59128232 | -40.1834 |
| ZINC59133947 | -37.148  |
| ZINC59134281 | -35.7512 |
| ZINC59138592 | -46.2747 |
| ZINC59147435 | -37.9209 |
| ZINC59147435 | -38.457  |
| ZINC59152656 | -32.9181 |
| ZINC59152786 | -37.2692 |
| ZINC59153297 | -39.1436 |
| ZINC59163070 | -30.5228 |
| ZINC59165766 | -42.0938 |
| ZINC59165895 | -38.5802 |
| ZINC59165895 | -42.6668 |
| ZINC59166408 | -41.732  |
| ZINC59170932 | -35.3643 |
| ZINC59231462 | -30.4252 |
| ZINC59232271 | -40.419  |
| ZINC59232483 | -40.3959 |
| ZINC59239093 | -37.4468 |
| ZINC59246137 | -30.0702 |

|              |          |
|--------------|----------|
| ZINC59249595 | -38.9389 |
| ZINC59267184 | -34.1695 |
| ZINC59267184 | -36.1551 |
| ZINC59271836 | -44.7358 |
| ZINC59276711 | -31.1111 |
| ZINC59277770 | -36.5388 |
| ZINC59293309 | -26.7931 |
| ZINC59293346 | -21.4794 |
| ZINC59293460 | -27.6104 |
| ZINC59293687 | -28.3265 |
| ZINC59302085 | -44.087  |
| ZINC59302323 | -51.5094 |
| ZINC59303457 | -48.0547 |
| ZINC59303623 | -46.2974 |
| ZINC59304848 | -39.6012 |
| ZINC59316049 | -43.2803 |
| ZINC59352063 | -36.9563 |
| ZINC59366494 | -36.8516 |
| ZINC59366754 | -40.1922 |
| ZINC59366861 | -38.3816 |
| ZINC59366941 | -34.197  |
| ZINC59367375 | -31.4278 |
| ZINC59367698 | -34.1761 |
| ZINC59379690 | -45.1619 |
| ZINC59381818 | -32.705  |
| ZINC59381904 | -42.1149 |
| ZINC59383120 | -35.0557 |
| ZINC59384711 | -41.0222 |
| ZINC59384711 | -45.7598 |
| ZINC59392261 | -45.8616 |
| ZINC59397578 | -31.2253 |
| ZINC59397578 | -42.2588 |
| ZINC59399125 | -29.6411 |
| ZINC59400047 | -47.3646 |
| ZINC59417712 | -44.0401 |
| ZINC59417712 | -45.3286 |
| ZINC59418659 | -31.1462 |
| ZINC59457269 | -42.4052 |
| ZINC59459838 | -42.334  |
| ZINC59459918 | -37.2145 |
| ZINC59460019 | -39.4232 |
| ZINC59460911 | -42.4709 |
| ZINC59474727 | -39.2674 |
| ZINC59477591 | -54.3903 |

|              |          |
|--------------|----------|
| ZINC59477833 | -42.3142 |
| ZINC59489150 | -38.1847 |
| ZINC59489284 | -44.0665 |
| ZINC59491341 | -25.4468 |
| ZINC59515246 | -51.6224 |
| ZINC59515465 | -50.2831 |
| ZINC59519649 | -33.5784 |
| ZINC59705280 | -41.1365 |
| ZINC59741829 | -38.7408 |
| ZINC59761244 | -40.9118 |
| ZINC59849469 | -50.1061 |
| ZINC59859875 | -44.7517 |
| ZINC59862613 | -36.3346 |
| ZINC59862613 | -43.485  |
| ZINC59936440 | -49.4044 |
| ZINC59948016 | -34.1709 |
| ZINC59988854 | -43.5224 |
| ZINC60197011 | -38.5588 |
| ZINC60198489 | -36.2294 |
| ZINC60212424 | -48.1732 |
| ZINC60282264 | -36.506  |
| ZINC60342684 | -34.6274 |
| ZINC60342684 | -40.7565 |
| ZINC60370253 | -37.6255 |
| ZINC60388844 | -41.6086 |
| ZINC60445418 | -31.3026 |
| ZINC60445418 | -47.3252 |
| ZINC60455622 | -36.5817 |
| ZINC60461416 | -34.4661 |
| ZINC60511540 | -32.5049 |
| ZINC60559314 | -37.3293 |
| ZINC60582856 | -39.5968 |
| ZINC60600410 | -41.1904 |
| ZINC60670024 | -44.2739 |
| ZINC60738107 | -34.6868 |
| ZINC60740776 | -32.9893 |
| ZINC60766094 | -45.499  |
| ZINC60766432 | -36.0844 |
| ZINC60783640 | -39.9183 |
| ZINC60785244 | -32.6963 |
| ZINC60791711 | -42.5193 |
| ZINC60838755 | -42.5917 |
| ZINC60865497 | -44.035  |
| ZINC60914175 | -41.3568 |

|              |          |
|--------------|----------|
| ZINC60914521 | -45.2388 |
| ZINC60943836 | -34.6871 |
| ZINC60955626 | -46.1949 |
| ZINC60965802 | -48.9999 |
| ZINC60968756 | -39.9756 |
| ZINC60976933 | -47.7288 |
| ZINC60978997 | -49.1408 |
| ZINC61013071 | -33.8859 |
| ZINC61013071 | -37.282  |
| ZINC61028355 | -37.3491 |
| ZINC61028355 | -40.973  |
| ZINC61031065 | -40.0524 |
| ZINC61108961 | -37.226  |
| ZINC61110656 | -42.2135 |
| ZINC61189627 | -40.6758 |
| ZINC61210387 | -44.931  |
| ZINC61268827 | -38.7121 |
| ZINC61354184 | -43.108  |
| ZINC61369357 | -39.6547 |
| ZINC61399484 | -41.5896 |
| ZINC61399484 | -44.1296 |
| ZINC61444836 | -51.5918 |
| ZINC61465125 | -42.5894 |
| ZINC61548089 | -37.306  |
| ZINC61553896 | -47.1405 |
| ZINC61718107 | -49.3151 |
| ZINC61718973 | -41.0308 |
| ZINC61718973 | -50.3639 |
| ZINC61719052 | -38.0488 |
| ZINC61719052 | -44.6098 |
| ZINC61720121 | -48.3655 |
| ZINC61898108 | -48.7005 |
| ZINC61902836 | -30.4229 |
| ZINC61905233 | -36.2943 |
| ZINC61906146 | -38.1399 |
| ZINC61906146 | -39.389  |
| ZINC61906683 | -32.5892 |
| ZINC61906731 | -35.2638 |
| ZINC61906731 | -37.1492 |
| ZINC61926087 | -31.8198 |
| ZINC61926087 | -37.879  |
| ZINC61930112 | -22.0136 |
| ZINC61943401 | -36.8063 |
| ZINC61958425 | -42.9532 |



|              |          |
|--------------|----------|
| ZINC61974478 | -43.9576 |
| ZINC61997447 | -36.6174 |
| ZINC61997952 | -35.9681 |
| ZINC62001376 | -41.5822 |
| ZINC62006686 | -53.0784 |
| ZINC62023029 | -45.7879 |
| ZINC62042279 | -45.3854 |
| ZINC62055702 | -31.5119 |
| ZINC62129789 | -35.9737 |
| ZINC62129789 | -39.9608 |
| ZINC62130984 | -42.591  |
| ZINC62145905 | -42.7965 |
| ZINC62161285 | -40.8423 |
| ZINC62250810 | -38.7108 |
| ZINC62250810 | -38.7941 |
| ZINC62268688 | -51.6867 |
| ZINC62319086 | -32.6583 |
| ZINC62395601 | -51.9452 |
| ZINC62569419 | -35.8146 |
| ZINC62674866 | -44.0393 |
| ZINC62789949 | -38.3324 |
| ZINC63060519 | -33.3094 |
| ZINC63068043 | -26.2074 |
| ZINC63068043 | -37.149  |
| ZINC63093873 | -33.8847 |
| ZINC63096928 | -40.7782 |
| ZINC63107968 | -38.765  |
| ZINC63111260 | -44.2905 |
| ZINC63122531 | -45.5554 |
| ZINC63137966 | -22.5898 |
| ZINC63152286 | -34.1243 |
| ZINC63152286 | -37.8738 |
| ZINC63160888 | -28.0265 |
| ZINC63161135 | -40.2365 |
| ZINC63172498 | -36.1995 |
| ZINC63180027 | -36.4631 |
| ZINC63180027 | -37.4884 |
| ZINC63223517 | -48.6401 |
| ZINC63225216 | -26.1367 |
| ZINC63254309 | -43.8559 |
| ZINC63269062 | -46.5866 |
| ZINC63280299 | -36.3575 |
| ZINC63280299 | -37.4963 |
| ZINC63280308 | -33.3517 |

|              |          |
|--------------|----------|
| ZINC63280308 | -34.3485 |
| ZINC63284792 | -26.5689 |
| ZINC63294233 | -31.7784 |
| ZINC63330651 | -36.656  |
| ZINC63339735 | -38.379  |
| ZINC63350555 | -28.9491 |
| ZINC63350710 | -32.9879 |
| ZINC63351236 | -33.674  |
| ZINC63372363 | -23.2834 |
| ZINC63372363 | -24.6078 |
| ZINC63372375 | -23.9524 |
| ZINC63372375 | -29.3902 |
| ZINC63375859 | -15.6405 |
| ZINC63375859 | -33.059  |
| ZINC63376161 | -34.3711 |
| ZINC63381322 | -35.1546 |
| ZINC63381322 | -42.2084 |
| ZINC63393747 | -35.698  |
| ZINC63393959 | -31.4211 |
| ZINC63393959 | -37.7152 |
| ZINC63401882 | -43.4751 |
| ZINC63412617 | -35.0869 |
| ZINC63415789 | -39.8416 |
| ZINC63416385 | -34.5991 |
| ZINC63437128 | -42.3937 |
| ZINC63437224 | -35.6053 |
| ZINC63457982 | -30.9198 |
| ZINC63458388 | -40.4982 |
| ZINC63472362 | -45.0293 |
| ZINC63477181 | -47.8264 |
| ZINC63478943 | -41.0666 |
| ZINC63486097 | -38.8959 |
| ZINC63490387 | -42.6906 |
| ZINC63493308 | -34.4004 |
| ZINC63493308 | -38.662  |
| ZINC63515598 | -35.1705 |
| ZINC63515598 | -40.9698 |
| ZINC63518520 | -30.4263 |
| ZINC63520689 | -25.9635 |
| ZINC63520689 | -55.051  |
| ZINC63526711 | -23.1857 |
| ZINC63526711 | -26.9225 |
| ZINC63529380 | -36.3659 |
| ZINC63531437 | -30.0853 |

|              |          |
|--------------|----------|
| ZINC63531437 | -37.9502 |
| ZINC63545969 | -44.9476 |
| ZINC63592980 | -46.2284 |
| ZINC63593441 | -40.1502 |
| ZINC63598002 | -38.2115 |
| ZINC63617266 | -45.8018 |
| ZINC63617266 | -48.6183 |
| ZINC63625624 | -43.859  |
| ZINC63625627 | -38.2083 |
| ZINC63625839 | -38.0649 |
| ZINC63626130 | -31.3548 |
| ZINC63626130 | -33.5917 |
| ZINC63626193 | -29.8539 |
| ZINC63635025 | -39.9267 |
| ZINC63637833 | -33.62   |
| ZINC63637833 | -36.033  |
| ZINC63646934 | -42.6226 |
| ZINC63647428 | -43.5472 |
| ZINC63660753 | -38.7571 |
| ZINC63660753 | -47.7029 |
| ZINC63695982 | -38.3055 |
| ZINC63695982 | -38.5353 |
| ZINC63697783 | -32.3282 |
| ZINC63730619 | -29.041  |
| ZINC63732948 | -48.3764 |
| ZINC63734899 | -34.0976 |
| ZINC63752203 | -38.2161 |
| ZINC63766461 | -38.638  |
| ZINC63786339 | -36.8647 |
| ZINC63795536 | -33.7723 |
| ZINC63803313 | -47.0543 |
| ZINC63807975 | -39.7701 |
| ZINC63808173 | -36.9865 |
| ZINC63818596 | -38.4438 |
| ZINC63820690 | -53.3295 |
| ZINC63831457 | -37.7158 |
| ZINC63845710 | -47.967  |
| ZINC63863551 | -38.6855 |
| ZINC63863596 | -38.7029 |
| ZINC63870572 | -28.8865 |
| ZINC63870851 | -40.2727 |
| ZINC63871970 | -44.4517 |
| ZINC63872003 | -36.2482 |
| ZINC63872023 | -43.8563 |

|              |          |
|--------------|----------|
| ZINC63872023 | -46.0444 |
| ZINC63881662 | -39.0139 |
| ZINC63883586 | -48.1016 |
| ZINC63884517 | -35.5283 |
| ZINC63884517 | -37.5196 |
| ZINC63885262 | -31.4849 |
| ZINC63885262 | -43.0028 |
| ZINC63899734 | -29.7654 |
| ZINC63925876 | -33.5925 |
| ZINC63925876 | -41.4667 |
| ZINC63926092 | -42.3518 |
| ZINC63926341 | -45.803  |
| ZINC63927077 | -39.3239 |
| ZINC63949821 | -44.0817 |
| ZINC63952283 | -46.6904 |
| ZINC63952627 | -34.1433 |
| ZINC63959116 | -40.0301 |
| ZINC63963000 | -45.4178 |
| ZINC63985184 | -27.7374 |
| ZINC63985747 | -22.8085 |
| ZINC63985747 | -32.8882 |
| ZINC63985960 | -43.9351 |
| ZINC63985960 | -47.9345 |
| ZINC63996624 | -34.0347 |
| ZINC64002465 | -35.6974 |
| ZINC64006878 | -29.0486 |
| ZINC64024292 | -25.1255 |
| ZINC64032169 | -44.5483 |
| ZINC64040328 | -17.6709 |
| ZINC64045327 | -36.752  |
| ZINC64058432 | -45.0596 |
| ZINC64066950 | -31.9226 |
| ZINC64067025 | -31.3345 |
| ZINC64067025 | -32.6143 |
| ZINC64093825 | -31.9991 |
| ZINC64111138 | -22.8544 |
| ZINC64164284 | -29.079  |
| ZINC64164284 | -42.9634 |
| ZINC64166188 | -28.9718 |
| ZINC64166188 | -34.0109 |
| ZINC64166383 | -45.5313 |
| ZINC64279956 | -39.749  |
| ZINC64320207 | -31.3869 |
| ZINC64320355 | -33.9026 |

|              |          |
|--------------|----------|
| ZINC64334328 | -32.5659 |
| ZINC64334328 | -37.1429 |
| ZINC64334472 | -39.7601 |
| ZINC64334472 | -40.7283 |
| ZINC64337250 | -31.492  |
| ZINC64337250 | -33.9486 |
| ZINC64349031 | -42.2053 |
| ZINC64442953 | -34.6113 |
| ZINC64467698 | -29.3458 |
| ZINC64467698 | -38.082  |
| ZINC64471506 | -49.7419 |
| ZINC64482419 | -45.782  |
| ZINC64492052 | -38.9398 |
| ZINC64517535 | -28.9403 |
| ZINC64537311 | -47.0458 |
| ZINC64552219 | -35.0998 |
| ZINC64553402 | -36.124  |
| ZINC64567878 | -36.9681 |
| ZINC64568209 | -32.4484 |
| ZINC64572938 | -45.2477 |
| ZINC64592151 | -36.627  |
| ZINC64606845 | -38.6775 |
| ZINC64611430 | -27.7073 |
| ZINC64662324 | -43.2068 |
| ZINC64668149 | -29.8377 |
| ZINC64674506 | -36.4894 |
| ZINC64676577 | -38.2168 |
| ZINC64702631 | -47.0715 |
| ZINC64702703 | -45.5812 |
| ZINC64714262 | -52.5477 |
| ZINC64719100 | -38.3662 |
| ZINC64740505 | -50.588  |
| ZINC64741096 | -30.0063 |
| ZINC64741359 | -31.8836 |
| ZINC64743894 | -34.8221 |
| ZINC64749949 | -44.682  |
| ZINC64756466 | -40.8058 |
| ZINC64787596 | -29.7135 |
| ZINC64788653 | -50.1284 |
| ZINC64788653 | -53.4509 |
| ZINC64788731 | -27.341  |
| ZINC64788731 | -40.1702 |
| ZINC64789081 | -26.8414 |
| ZINC64789081 | -39.2616 |

|              |          |
|--------------|----------|
| ZINC64789158 | -35.9194 |
| ZINC64808332 | -36.4881 |
| ZINC64812727 | -49.3486 |
| ZINC64825445 | -48.0467 |
| ZINC64833329 | -36.1209 |
| ZINC64835811 | -45.9753 |
| ZINC64843832 | -40.6739 |
| ZINC64843832 | -41.7963 |
| ZINC64851899 | -46.7958 |
| ZINC64862786 | -37.0256 |
| ZINC64865295 | -43.1547 |
| ZINC64869219 | -29.6084 |
| ZINC64876944 | -35.3275 |
| ZINC64895728 | -35.0696 |
| ZINC64896181 | -44.3368 |
| ZINC64899067 | -26.6402 |
| ZINC64916705 | -43.1859 |
| ZINC64927043 | -33.0994 |
| ZINC64929451 | -36.3847 |
| ZINC64929451 | -41.9035 |
| ZINC64979205 | -33.4457 |
| ZINC64979213 | -33.8532 |
| ZINC65003883 | -41.6596 |
| ZINC65009348 | -42.5383 |
| ZINC65058248 | -30.9634 |
| ZINC65062623 | -37.5131 |
| ZINC65090551 | -41.645  |
| ZINC65090551 | -45.0381 |
| ZINC65097308 | -39.8626 |
| ZINC65120173 | -38.9489 |
| ZINC65120173 | -40.3382 |
| ZINC65120458 | -49.4359 |
| ZINC65141472 | -45.0213 |
| ZINC65147822 | -47.4482 |
| ZINC65160300 | -43.618  |
| ZINC65177863 | -38.2001 |
| ZINC65177863 | -41.6185 |
| ZINC65183356 | -32.8871 |
| ZINC65210050 | -37.6633 |
| ZINC65235324 | -38.1129 |
| ZINC65238736 | -41.916  |
| ZINC65241808 | -28.5227 |
| ZINC65241847 | -34.5456 |
| ZINC65246647 | -34.517  |

|              |          |
|--------------|----------|
| ZINC65288787 | -39.0661 |
| ZINC65335482 | -37.8137 |
| ZINC65355614 | -34.9648 |
| ZINC65355614 | -38.3486 |
| ZINC65356826 | -26.9194 |
| ZINC65356826 | -27.4993 |
| ZINC65357253 | -34.9923 |
| ZINC65369808 | -39.6328 |
| ZINC65370073 | -40.0412 |
| ZINC65370499 | -34.5068 |
| ZINC65371888 | -40.3322 |
| ZINC65373305 | -45.6698 |
| ZINC65383567 | -27.2047 |
| ZINC65383567 | -37.138  |
| ZINC65386367 | -34.3914 |
| ZINC65387522 | -31.9754 |
| ZINC65387522 | -33.1597 |
| ZINC65404151 | -40.1157 |
| ZINC65404151 | -43.6844 |
| ZINC65404397 | -36.9033 |
| ZINC65404397 | -39.4878 |
| ZINC65408273 | -25.9013 |
| ZINC65415568 | -42.117  |
| ZINC65420565 | -36.9374 |
| ZINC65420565 | -41.7606 |
| ZINC65421487 | -37.6973 |
| ZINC65421487 | -42.4369 |
| ZINC65428157 | -35.191  |
| ZINC65428157 | -35.3395 |
| ZINC65428310 | -43.0829 |
| ZINC65430334 | -37.7028 |
| ZINC65431062 | -43.7359 |
| ZINC65431434 | -24.4002 |
| ZINC65433561 | -32.2026 |
| ZINC65433561 | -39.7217 |
| ZINC65433930 | -40.3462 |
| ZINC65435727 | -41.7281 |
| ZINC65435727 | -50.5853 |
| ZINC65444132 | -39.4842 |
| ZINC65444132 | -42.5449 |
| ZINC65449447 | -38.1216 |
| ZINC65453020 | -41.6791 |
| ZINC65454231 | -32.8888 |
| ZINC65454231 | -38.6079 |

|              |          |
|--------------|----------|
| ZINC65456572 | -30.0722 |
| ZINC65456572 | -34.1132 |
| ZINC65458481 | -31.9109 |
| ZINC65460491 | -38.0379 |
| ZINC65460491 | -39.8205 |
| ZINC65466538 | -26.1301 |
| ZINC65470585 | -39.1309 |
| ZINC65476867 | -33.1687 |
| ZINC65476867 | -35.5937 |
| ZINC65476924 | -35.0999 |
| ZINC65487748 | -35.8641 |
| ZINC65497490 | -40.401  |
| ZINC65501801 | -35.6219 |
| ZINC65507660 | -36.1438 |
| ZINC65514733 | -40.0351 |
| ZINC65514733 | -45.7029 |
| ZINC65527611 | -31.7201 |
| ZINC65527611 | -35.0228 |
| ZINC65531959 | -37.9562 |
| ZINC65535426 | -46.0357 |
| ZINC65543073 | -45.069  |
| ZINC65548233 | -44.0359 |
| ZINC65548302 | -32.5337 |
| ZINC65552646 | -37.2683 |
| ZINC65565411 | -40.8263 |
| ZINC65567340 | -41.1439 |
| ZINC65592490 | -34.7669 |
| ZINC65593984 | -51.3597 |
| ZINC65596130 | -40.2519 |
| ZINC65608187 | -37.3074 |
| ZINC65616642 | -47.0306 |
| ZINC65643345 | -45.8348 |
| ZINC65724825 | -40.2796 |
| ZINC65726083 | -41.9201 |
| ZINC65738312 | -43.0876 |
| ZINC65742824 | -40.5    |
| ZINC65744355 | -50.8494 |
| ZINC65764398 | -52.4404 |
| ZINC65770211 | -35.6617 |
| ZINC65770211 | -41.6927 |
| ZINC65781978 | -50.7954 |
| ZINC65950699 | -42.7865 |
| ZINC65965193 | -28.9415 |
| ZINC65965193 | -37.6323 |



|              |          |
|--------------|----------|
| ZINC66004217 | -44.7377 |
| ZINC66006541 | -27.1283 |
| ZINC66036716 | -36.527  |
| ZINC66077589 | -31.0053 |
| ZINC66077589 | -33.396  |
| ZINC66089798 | -32.4267 |
| ZINC66107140 | -43.4901 |
| ZINC66113948 | -43.7462 |
| ZINC66114580 | -42.2255 |
| ZINC66127155 | -42.6543 |
| ZINC66134104 | -43.624  |
| ZINC66134815 | -32.9982 |
| ZINC66141147 | -35.1711 |
| ZINC66143042 | -33.9904 |
| ZINC66143042 | -36.179  |
| ZINC66143455 | -45.5744 |
| ZINC66155932 | -36.203  |
| ZINC66155932 | -38.017  |
| ZINC66172156 | -32.9177 |
| ZINC66173533 | -50.4085 |
| ZINC66182694 | -40.4377 |
| ZINC66183048 | -35.4153 |
| ZINC66190791 | -33.1154 |
| ZINC66200943 | -37.0154 |
| ZINC66211898 | -44.3986 |
| ZINC66236739 | -36.1754 |
| ZINC66236739 | -38.1282 |
| ZINC66256263 | -43.2586 |
| ZINC66263686 | -33.8111 |
| ZINC66264204 | -43.7775 |
| ZINC66277557 | -38.4938 |
| ZINC66293259 | -39.3313 |
| ZINC66301525 | -31.1321 |
| ZINC66314730 | -39.8088 |
| ZINC66318847 | -43.6925 |
| ZINC66319050 | -20.5685 |
| ZINC66324255 | -42.0148 |
| ZINC66336239 | -41.8049 |
| ZINC66338862 | -34.0734 |
| ZINC66342935 | -39.5491 |
| ZINC66354314 | -39.0826 |
| ZINC66370779 | -43.0939 |
| ZINC66370779 | -43.4996 |
| ZINC66377507 | -42.5244 |

|              |          |
|--------------|----------|
| ZINC66380315 | -38.8053 |
| ZINC66391793 | -35.4072 |
| ZINC66393113 | -36.1634 |
| ZINC66394298 | -37.3442 |
| ZINC66394428 | -40.9885 |
| ZINC66398955 | -36.6119 |
| ZINC66400910 | -36.5152 |
| ZINC66401730 | -44.7964 |
| ZINC66403111 | -33.7668 |
| ZINC66403130 | -40.5636 |
| ZINC66449890 | -38.2126 |
| ZINC66449890 | -43.2374 |
| ZINC66452093 | -39.0105 |
| ZINC66458953 | -33.5005 |
| ZINC66470945 | -52.2368 |
| ZINC66496608 | -41.3481 |
| ZINC66501977 | -39.0084 |
| ZINC66517363 | -46.4095 |
| ZINC66517607 | -48.2496 |
| ZINC66517891 | -40.6898 |
| ZINC66530621 | -47.5673 |
| ZINC66532037 | -40.2662 |
| ZINC66532037 | -40.4514 |
| ZINC66544411 | -45.6631 |
| ZINC66552133 | -33.4105 |
| ZINC66552822 | -41.6164 |
| ZINC66554163 | -43.915  |
| ZINC66561448 | -35.3571 |
| ZINC66568845 | -37.0809 |
| ZINC66569147 | -37.0358 |
| ZINC66572323 | -34.9191 |
| ZINC66578337 | -40.5737 |
| ZINC66578337 | -42.7487 |
| ZINC66636987 | -45.0382 |
| ZINC66639040 | -46.2782 |
| ZINC66648670 | -44.648  |
| ZINC66670302 | -31.8509 |
| ZINC66675658 | -34.7258 |
| ZINC66677218 | -40.4485 |
| ZINC66679125 | -40.2353 |
| ZINC66679125 | -44.4346 |
| ZINC66679229 | -39.2981 |
| ZINC66679229 | -42.7509 |
| ZINC66679354 | -45.06   |

|              |          |
|--------------|----------|
| ZINC66679354 | -45.1014 |
| ZINC66679761 | -33.8893 |
| ZINC66679761 | -40.6956 |
| ZINC66679847 | -39.5843 |
| ZINC66679847 | -43.2451 |
| ZINC66687124 | -44.6723 |
| ZINC66695390 | -48.8803 |
| ZINC66696358 | -31.2175 |
| ZINC66697795 | -44.0173 |
| ZINC66706957 | -35.9332 |
| ZINC66708197 | -42.6999 |
| ZINC66708197 | -43.4066 |
| ZINC66717862 | -48.5999 |
| ZINC66737523 | -40.2445 |
| ZINC66737638 | -29.6122 |
| ZINC66737877 | -36.3994 |
| ZINC66741886 | -43.1256 |
| ZINC66773432 | -38.2763 |
| ZINC66786388 | -34.7555 |
| ZINC66786507 | -37.6948 |
| ZINC66786775 | -38.7742 |
| ZINC66787171 | -44.152  |
| ZINC66787245 | -38.0563 |
| ZINC66795228 | -42.8634 |
| ZINC66795848 | -36.9588 |
| ZINC66795848 | -43.2613 |
| ZINC66798361 | -27.7917 |
| ZINC66802683 | -28.8928 |
| ZINC66809039 | -50.6733 |
| ZINC66809373 | -38.9851 |
| ZINC66810876 | -26.8086 |
| ZINC66810876 | -37.1277 |
| ZINC66811580 | -45.9817 |
| ZINC66812065 | -51.5902 |
| ZINC66812339 | -45.4593 |
| ZINC66813020 | -36.3448 |
| ZINC66815059 | -38.6889 |
| ZINC66831177 | -35.7812 |
| ZINC66836088 | -39.4003 |
| ZINC66837052 | -37.6063 |
| ZINC66842067 | -41.7709 |
| ZINC66844830 | -31.3149 |
| ZINC66844830 | -40.3565 |
| ZINC66845399 | -45.2318 |

|              |          |
|--------------|----------|
| ZINC66848410 | -46.3297 |
| ZINC66849907 | -27.3445 |
| ZINC66854305 | -29.2308 |
| ZINC66872745 | -41.587  |
| ZINC66872745 | -43.2346 |
| ZINC66884437 | -33.4083 |
| ZINC66887591 | -46.1585 |
| ZINC66887591 | -54.4486 |
| ZINC66891635 | -30.37   |
| ZINC66894196 | -45.3094 |
| ZINC66898188 | -40.2041 |
| ZINC66903329 | -39.1747 |
| ZINC66913431 | -41.8592 |
| ZINC66922043 | -25.62   |
| ZINC66951179 | -42.0509 |
| ZINC66951936 | -48.1789 |
| ZINC66951951 | -43.9352 |
| ZINC66957971 | -47.9955 |
| ZINC66961284 | -44.89   |
| ZINC66967019 | -42.3058 |
| ZINC66968977 | -34.5519 |
| ZINC66986693 | -29.5326 |
| ZINC66986693 | -30.6719 |
| ZINC66999268 | -42.6135 |
| ZINC67029076 | -39.7604 |
| ZINC67052015 | -40.7896 |
| ZINC67052015 | -45.976  |
| ZINC67071916 | -40.1611 |
| ZINC67071916 | -46.1915 |
| ZINC67079840 | -44.3087 |
| ZINC67079840 | -53.8731 |
| ZINC67094353 | -28.2383 |
| ZINC67094353 | -44.444  |
| ZINC67095272 | -31.0796 |
| ZINC67103271 | -37.727  |
| ZINC67110371 | -45.2405 |
| ZINC67113819 | -33.5863 |
| ZINC67118068 | -39.4824 |
| ZINC67128143 | -35.3296 |
| ZINC67171837 | -35.3991 |
| ZINC67171896 | -35.596  |
| ZINC67172452 | -40.023  |
| ZINC67172452 | -45.1154 |
| ZINC67172515 | -37.4751 |

|              |          |
|--------------|----------|
| ZINC67172526 | -31.0403 |
| ZINC67172526 | -36.4821 |
| ZINC67172828 | -29.1397 |
| ZINC67172828 | -34.6855 |
| ZINC67178690 | -34.7865 |
| ZINC67189524 | -38.4611 |
| ZINC67189545 | -38.1257 |
| ZINC67194112 | -33.9233 |
| ZINC67196166 | -33.9738 |
| ZINC67202808 | -43.6498 |
| ZINC67202808 | -45.2165 |
| ZINC67211330 | -40.026  |
| ZINC67213872 | -45.6328 |
| ZINC67228270 | -42.3931 |
| ZINC67230497 | -42.8027 |
| ZINC67237703 | -40.6224 |
| ZINC67250799 | -23.8692 |
| ZINC67250799 | -36.4247 |
| ZINC67266105 | -44.0152 |
| ZINC67284254 | -48.3379 |
| ZINC67285163 | -24.2599 |
| ZINC67285163 | -35.6147 |
| ZINC67286564 | -29.0687 |
| ZINC67286564 | -31.1379 |
| ZINC67288015 | -36.6021 |
| ZINC67288015 | -37.0648 |
| ZINC67288750 | -31.6405 |
| ZINC67308300 | -45.4851 |
| ZINC67308303 | -38.5401 |
| ZINC67311174 | -45.5157 |
| ZINC67313540 | -41.8958 |
| ZINC67313765 | -47.1006 |
| ZINC67319168 | -38.3744 |
| ZINC67330146 | -44.4477 |
| ZINC67338329 | -46.0008 |
| ZINC67339274 | -39.7641 |
| ZINC67339320 | -46.7599 |
| ZINC67339623 | -48.1561 |
| ZINC67340532 | -38.345  |
| ZINC67340770 | -31.5647 |
| ZINC67343613 | -44.8929 |
| ZINC67346375 | -35.1768 |
| ZINC67346375 | -39.233  |
| ZINC67347449 | -45.128  |

|              |          |
|--------------|----------|
| ZINC67348340 | -42.134  |
| ZINC67350925 | -37.7795 |
| ZINC67370325 | -34.8639 |
| ZINC67370325 | -43.9968 |
| ZINC67372397 | -36.5786 |
| ZINC67380560 | -38.2604 |
| ZINC67380560 | -43.6817 |
| ZINC67399381 | -36.7146 |
| ZINC67399521 | -42.7555 |
| ZINC67407063 | -43.3311 |
| ZINC67418377 | -30.0761 |
| ZINC67427131 | -42.5764 |
| ZINC67431898 | -35.737  |
| ZINC67431898 | -39.6388 |
| ZINC67432849 | -37.1638 |
| ZINC67434185 | -36.963  |
| ZINC67434185 | -37.3831 |
| ZINC67434912 | -46.9522 |
| ZINC67434920 | -20.1516 |
| ZINC67434920 | -32.1905 |
| ZINC67459613 | -28.4507 |
| ZINC67484693 | -40.2037 |
| ZINC67490147 | -48.0453 |
| ZINC67490759 | -44.6889 |
| ZINC67509363 | -43.4061 |
| ZINC67514234 | -37.1428 |
| ZINC67514234 | -43.1159 |
| ZINC67526886 | -43.1048 |
| ZINC67539183 | -40.618  |
| ZINC67546143 | -42.6394 |
| ZINC67546143 | -44.0018 |
| ZINC67549016 | -39.3917 |
| ZINC67573840 | -36.6386 |
| ZINC67585461 | -44.7012 |
| ZINC67600556 | -47.9507 |
| ZINC67633527 | -43.9081 |
| ZINC67634957 | -48.1038 |
| ZINC67641269 | -22.8547 |
| ZINC67641269 | -41.6348 |
| ZINC67674975 | -31.9634 |
| ZINC67674975 | -43.9866 |
| ZINC67675556 | -37.6569 |
| ZINC67689646 | -41.1469 |
| ZINC67690638 | -29.9381 |

|              |          |
|--------------|----------|
| ZINC67690638 | -37.8256 |
| ZINC67698037 | -42.2005 |
| ZINC67720057 | -32.7901 |
| ZINC67721814 | -47.8542 |
| ZINC67726372 | -36.5801 |
| ZINC67726372 | -37.8198 |
| ZINC67727182 | -36.3351 |
| ZINC67734774 | -40.3438 |
| ZINC67739569 | -33.1968 |
| ZINC67741677 | -31.3333 |
| ZINC67751774 | -45.4056 |
| ZINC67756288 | -37.7162 |
| ZINC67756901 | -47.8875 |
| ZINC67771001 | -29.0587 |
| ZINC67771692 | -23.6721 |
| ZINC67771692 | -30.4201 |
| ZINC67773599 | -42.5254 |
| ZINC67773599 | -48.8831 |
| ZINC67774013 | -39.5412 |
| ZINC67785927 | -33.4808 |
| ZINC67804843 | -36.1135 |
| ZINC67816967 | -36.1506 |
| ZINC67817955 | -29.0937 |
| ZINC67818493 | -36.2446 |
| ZINC67840501 | -44.4991 |
| ZINC67841908 | -45.1719 |
| ZINC67842470 | -35.2284 |
| ZINC67842470 | -38.5482 |
| ZINC67850122 | -44.9981 |
| ZINC67850122 | -47.8309 |
| ZINC67855713 | -33.8551 |
| ZINC67869112 | -38.6907 |
| ZINC67876480 | -41.0048 |
| ZINC67882108 | -49.9688 |
| ZINC67882397 | -37.7312 |
| ZINC67884032 | -40.0089 |
| ZINC67884032 | -43.0769 |
| ZINC67895211 | -39.3201 |
| ZINC67896106 | -45.7202 |
| ZINC67896106 | -49.8193 |
| ZINC67898805 | -45.3864 |
| ZINC67898805 | -49.6914 |
| ZINC67898826 | -32.2589 |
| ZINC67898826 | -38.0193 |

|              |          |
|--------------|----------|
| ZINC67909824 | -43.4906 |
| ZINC67937220 | -40.4124 |
| ZINC67937893 | -43.5147 |
| ZINC67946355 | -22.6941 |
| ZINC67946355 | -29.5989 |
| ZINC67948716 | -42.8625 |
| ZINC67948722 | -41.816  |
| ZINC67954796 | -39.9791 |
| ZINC67954796 | -42.4375 |
| ZINC67956316 | -24.6138 |
| ZINC67958981 | -44.7883 |
| ZINC67970649 | -41.5248 |
| ZINC67971993 | -34.0005 |
| ZINC67971993 | -41.2728 |
| ZINC67973287 | -44.7123 |
| ZINC67983431 | -43.1598 |
| ZINC67984987 | -38.6375 |
| ZINC67997415 | -43.4689 |
| ZINC68006214 | -41.5818 |
| ZINC68019089 | -39.9368 |
| ZINC68035262 | -38.2104 |
| ZINC68042067 | -46.7058 |
| ZINC68054031 | -41.2762 |
| ZINC68058421 | -42.8455 |
| ZINC68089738 | -46.8764 |
| ZINC68106375 | -44.3056 |
| ZINC68106375 | -49.0057 |
| ZINC68107764 | -27.499  |
| ZINC68124009 | -29.5427 |
| ZINC68125806 | -35.3411 |
| ZINC68125806 | -40.3231 |
| ZINC68125806 | -44.4604 |
| ZINC68136406 | -32.6132 |
| ZINC68136406 | -33.1686 |
| ZINC68143030 | -33.9239 |
| ZINC68144531 | -51.1223 |
| ZINC68159655 | -27.2332 |
| ZINC68171638 | -36.2504 |
| ZINC68201578 | -40.6518 |
| ZINC68220218 | -40.6668 |
| ZINC68227576 | -38.276  |
| ZINC68230422 | -40.138  |
| ZINC68255237 | -48.2146 |
| ZINC68263699 | -43.0554 |



|              |          |
|--------------|----------|
| ZINC68263957 | -38.2345 |
| ZINC68263957 | -46.4875 |
| ZINC68264215 | -43.9734 |
| ZINC68283899 | -39.5636 |
| ZINC68293752 | -42.6727 |
| ZINC68316669 | -35.9402 |
| ZINC68319776 | -28.06   |
| ZINC68319937 | -37.4785 |
| ZINC68319937 | -40.4139 |
| ZINC68323351 | -45.4109 |
| ZINC68324027 | -38.1932 |
| ZINC68328692 | -45.9651 |
| ZINC68350171 | -45.6507 |
| ZINC68350171 | -49.3881 |
| ZINC68358196 | -45.6114 |
| ZINC68388176 | -38.4082 |
| ZINC68389318 | -42.1543 |
| ZINC68405445 | -41.2039 |
| ZINC68410718 | -45.5648 |
| ZINC68413697 | -41.6173 |
| ZINC68413697 | -45.7454 |
| ZINC68435013 | -34.3959 |
| ZINC68448929 | -40.9574 |
| ZINC68453674 | -31.1217 |
| ZINC68453674 | -39.4383 |
| ZINC68454866 | -42.4974 |
| ZINC68455651 | -38.6156 |
| ZINC68456079 | -41.2212 |
| ZINC68459805 | -37.8917 |
| ZINC68480630 | -37.6072 |
| ZINC68510000 | -38.6815 |
| ZINC68516114 | -40.6916 |
| ZINC68517121 | -39.4934 |
| ZINC68518218 | -38.623  |
| ZINC68527146 | -39.6507 |
| ZINC68527146 | -44.3968 |
| ZINC68527400 | -43.9018 |
| ZINC68540989 | -26.6427 |
| ZINC68549030 | -44.2981 |
| ZINC68575031 | -32.8896 |
| ZINC68583039 | -32.2789 |
| ZINC68584835 | -38.8115 |
| ZINC68585156 | -31.2186 |
| ZINC68585304 | -32.8162 |

|              |          |
|--------------|----------|
| ZINC68585803 | -38.1436 |
| ZINC68594783 | -39.4826 |
| ZINC68662372 | -40.2973 |
| ZINC68680625 | -42.3688 |
| ZINC68706666 | -36.0985 |
| ZINC68726852 | -40.4626 |
| ZINC68736816 | -34.7153 |
| ZINC68744209 | -40.9274 |
| ZINC68744254 | -47.8865 |
| ZINC68753085 | -28.1951 |
| ZINC68768426 | -38.6483 |
| ZINC68768566 | -46.779  |
| ZINC68777782 | -40.5965 |
| ZINC68780070 | -31.3038 |
| ZINC68784489 | -36.1027 |
| ZINC68793440 | -42.156  |
| ZINC68799471 | -35.2375 |
| ZINC68844675 | -43.8255 |
| ZINC68855148 | -31.2737 |
| ZINC68864023 | -36.1204 |
| ZINC68864023 | -45.8969 |
| ZINC68865532 | -34.78   |
| ZINC68869086 | -37.6393 |
| ZINC68869428 | -37.9809 |
| ZINC68869428 | -38.3908 |
| ZINC68875631 | -34.3705 |
| ZINC68875631 | -49.0545 |
| ZINC68883081 | -45.3556 |
| ZINC68887550 | -47.7601 |
| ZINC68913446 | -38.5828 |
| ZINC68936706 | -36.0431 |
| ZINC68936771 | -40.2981 |
| ZINC68953009 | -34.4221 |
| ZINC68966498 | -42.3779 |
| ZINC68966498 | -44.9992 |
| ZINC68975731 | -33.7309 |
| ZINC68979786 | -34.9961 |
| ZINC68980664 | -45.0524 |
| ZINC68983097 | -52.4865 |
| ZINC68990691 | -34.678  |
| ZINC69008296 | -43.0542 |
| ZINC69008425 | -34.0303 |
| ZINC69008425 | -39.8525 |
| ZINC69008856 | -42.2766 |

|              |          |
|--------------|----------|
| ZINC69008856 | -46.0205 |
| ZINC69013560 | -38.3959 |
| ZINC69013560 | -41.3819 |
| ZINC69022766 | -25.3738 |
| ZINC69022766 | -26.1127 |
| ZINC69025811 | -47.0885 |
| ZINC69027343 | -37.17   |
| ZINC69066881 | -36.5496 |
| ZINC69066881 | -39.1576 |
| ZINC69067031 | -37.7312 |
| ZINC69067062 | -30.2812 |
| ZINC69067159 | -32.7682 |
| ZINC69067159 | -33.8106 |
| ZINC69069360 | -32.476  |
| ZINC69098647 | -34.6811 |
| ZINC69098868 | -39.7292 |
| ZINC69103253 | -44.2644 |
| ZINC69104092 | -35.733  |
| ZINC69104520 | -44.6051 |
| ZINC69112819 | -38.7148 |
| ZINC69114418 | -38.4413 |
| ZINC69114418 | -39.6919 |
| ZINC69130715 | -34.3671 |
| ZINC69147338 | -38.435  |
| ZINC69162734 | -42.9952 |
| ZINC69162734 | -43.1481 |
| ZINC69163948 | -43.7255 |
| ZINC69167178 | -29.5158 |
| ZINC69170105 | -41.5845 |
| ZINC69170852 | -34.1059 |
| ZINC69170852 | -41.3209 |
| ZINC69174352 | -43.518  |
| ZINC69179639 | -45.5401 |
| ZINC69189758 | -48.5291 |
| ZINC69212498 | -31.9695 |
| ZINC69212502 | -25.2439 |
| ZINC69215144 | -49.0977 |
| ZINC69217477 | -42.0687 |
| ZINC69222864 | -39.4193 |
| ZINC69247450 | -38.6814 |
| ZINC69251682 | -42.3431 |
| ZINC69260684 | -39.3819 |
| ZINC69260684 | -41.9428 |
| ZINC69277306 | -45.7062 |

|              |          |
|--------------|----------|
| ZINC69291928 | -35.2378 |
| ZINC69291928 | -41.2442 |
| ZINC69296375 | -45.292  |
| ZINC69302660 | -36.1224 |
| ZINC69315987 | -42.5539 |
| ZINC69324633 | -46.798  |
| ZINC69343640 | -41.9097 |
| ZINC69345489 | -37.2449 |
| ZINC69346195 | -46.0386 |
| ZINC69347506 | -34.4612 |
| ZINC69348891 | -34.4536 |
| ZINC69348891 | -39.8997 |
| ZINC69362865 | -48.2669 |
| ZINC69369000 | -35.8708 |
| ZINC69369000 | -40.0698 |
| ZINC69383739 | -38.5454 |
| ZINC69415962 | -41.5186 |
| ZINC69416863 | -37.1832 |
| ZINC69430742 | -35.9089 |
| ZINC69445114 | -36.6767 |
| ZINC69457234 | -39.0676 |
| ZINC69464506 | -35.782  |
| ZINC69464506 | -36.3754 |
| ZINC69483710 | -35.9888 |
| ZINC69485623 | -42.6216 |
| ZINC69491716 | -41.0479 |
| ZINC69508348 | -33.507  |
| ZINC69508822 | -37.5453 |
| ZINC69510347 | -35.004  |
| ZINC69512088 | -35.8513 |
| ZINC69517833 | -35.3749 |
| ZINC69518014 | -26.763  |
| ZINC69527329 | -47.2299 |
| ZINC69528257 | -30.635  |
| ZINC69528257 | -32.8919 |
| ZINC69533567 | -37.7267 |
| ZINC69534463 | -42.9657 |
| ZINC69535593 | -33.122  |
| ZINC69535593 | -40.616  |
| ZINC69538683 | -44.6396 |
| ZINC69538704 | -46.9911 |
| ZINC69539525 | -48.146  |
| ZINC69548116 | -41.3097 |
| ZINC69548175 | -47.55   |

|              |          |
|--------------|----------|
| ZINC69553409 | -40.5052 |
| ZINC69554182 | -47.4514 |
| ZINC69564488 | -38.194  |
| ZINC69564488 | -39.3426 |
| ZINC69564648 | -32.266  |
| ZINC69565364 | -26.7806 |
| ZINC69565364 | -33.2034 |
| ZINC69570110 | -41.3104 |
| ZINC69591337 | -42.3049 |
| ZINC69591337 | -45.3579 |
| ZINC69597986 | -41.8603 |
| ZINC69612931 | -46.7996 |
| ZINC69625116 | -48.4139 |
| ZINC69626827 | -45.1166 |
| ZINC69641581 | -55.2908 |
| ZINC69641816 | -46.8949 |
| ZINC69645938 | -44.3164 |
| ZINC69647937 | -49.9184 |
| ZINC69647937 | -51.7466 |
| ZINC69652129 | -46.4664 |
| ZINC69654251 | -34.844  |
| ZINC69654544 | -32.6359 |
| ZINC69654686 | -35.6904 |
| ZINC69656618 | -36.6141 |
| ZINC69663471 | -50.9677 |
| ZINC69671933 | -38.47   |
| ZINC69675076 | -33.7015 |
| ZINC69676871 | -33.1445 |
| ZINC69676871 | -36.9879 |
| ZINC69703788 | -47.5893 |
| ZINC69704816 | -41.3767 |
| ZINC69706930 | -41.1151 |
| ZINC69709975 | -35.3601 |
| ZINC69709975 | -43.6464 |
| ZINC69731325 | -41.9901 |
| ZINC69737083 | -41.9108 |
| ZINC69739093 | -30.8237 |
| ZINC69739254 | -39.8288 |
| ZINC69739254 | -42.7514 |
| ZINC69740479 | -35.1866 |
| ZINC69740479 | -43.9856 |
| ZINC69745531 | -40.2125 |
| ZINC69745531 | -47.7505 |
| ZINC69749317 | -40.0792 |

|              |          |
|--------------|----------|
| ZINC69770355 | -45.0143 |
| ZINC69770355 | -46.3158 |
| ZINC69771103 | -38.8178 |
| ZINC69771103 | -38.9879 |
| ZINC69775733 | -39.2842 |
| ZINC69775733 | -42.7601 |
| ZINC69780189 | -32.0107 |
| ZINC69780189 | -39.65   |
| ZINC69796595 | -28.9446 |
| ZINC69796595 | -32.3362 |
| ZINC69803930 | -23.1656 |
| ZINC69803930 | -33.1526 |
| ZINC69806123 | -34.0568 |
| ZINC69806332 | -42.4086 |
| ZINC69806532 | -39.4645 |
| ZINC69809017 | -37.9526 |
| ZINC69810091 | -36.1777 |
| ZINC69810933 | -52.7684 |
| ZINC69811155 | -41.7723 |
| ZINC69812057 | -36.4174 |
| ZINC69812057 | -40.1914 |
| ZINC69813147 | -33.0074 |
| ZINC69818161 | -37.4962 |
| ZINC69821644 | -36.7593 |
| ZINC69842435 | -36.5131 |
| ZINC69842446 | -43.2793 |
| ZINC69844039 | -42.7137 |
| ZINC69844623 | -40.5717 |
| ZINC69848532 | -46.0245 |
| ZINC69868340 | -28.3105 |
| ZINC69868682 | -31.1745 |
| ZINC69868682 | -41.2498 |
| ZINC69871684 | -42.0038 |
| ZINC69871684 | -44.8484 |
| ZINC69871813 | -37.8954 |
| ZINC69871813 | -42.2725 |
| ZINC69871813 | -43.9708 |
| ZINC69878021 | -37.2054 |
| ZINC69878021 | -39.8215 |
| ZINC69895318 | -36.6355 |
| ZINC69900443 | -41.4593 |
| ZINC69901076 | -50.1304 |
| ZINC69924504 | -42.3616 |
| ZINC69928565 | -28.3509 |

|              |          |
|--------------|----------|
| ZINC69928565 | -34.9289 |
| ZINC69935992 | -44.2515 |
| ZINC69949848 | -41.7853 |
| ZINC69949981 | -44.1301 |
| ZINC69952963 | -46.6799 |
| ZINC69971596 | -31.0121 |
| ZINC69971596 | -37.6515 |
| ZINC69972031 | -37.8781 |
| ZINC69975510 | -31.6684 |
| ZINC69979831 | -42.0787 |
| ZINC69980388 | -35.7837 |
| ZINC69980388 | -39.3967 |
| ZINC69991748 | -53.7179 |
| ZINC70016263 | -37.3098 |
| ZINC70032374 | -27.9448 |
| ZINC70032483 | -36.4021 |
| ZINC70036721 | -48.3336 |
| ZINC70039607 | -38.8354 |
| ZINC70047521 | -40.4706 |
| ZINC70431759 | -36.6964 |
| ZINC70451514 | -32.63   |
| ZINC70451514 | -36.1632 |
| ZINC70452100 | -33.4233 |
| ZINC70453031 | -43.683  |
| ZINC70453412 | -26.3106 |
| ZINC70456128 | -34.1284 |
| ZINC70460339 | -42.2101 |
| ZINC70460774 | -36.6443 |
| ZINC70638712 | -33.0953 |
| ZINC70638712 | -33.4758 |
| ZINC70668280 | -45.2045 |
| ZINC70695717 | -50.1181 |
| ZINC70696863 | -32.1768 |
| ZINC70706741 | -45.8956 |
| ZINC70718350 | -39.8779 |
| ZINC70753259 | -46.6737 |
| ZINC70753866 | -50.259  |
| ZINC70754902 | -34.6367 |
| ZINC70754902 | -38.2492 |
| ZINC70765618 | -39.2174 |
| ZINC70772316 | -35.9446 |
| ZINC70782082 | -40.0935 |
| ZINC70786721 | -38.2117 |
| ZINC70786721 | -39.3464 |

|              |          |
|--------------|----------|
| ZINC70790874 | -34.096  |
| ZINC70790874 | -37.3152 |
| ZINC70807683 | -35.9981 |
| ZINC70807918 | -34.517  |
| ZINC70808816 | -44.5945 |
| ZINC70813929 | -47.2393 |
| ZINC70814405 | -35.0923 |
| ZINC70814872 | -39.2874 |
| ZINC70838767 | -39.7021 |
| ZINC70839648 | -42.764  |
| ZINC70854214 | -35.2911 |
| ZINC70856219 | -40.3371 |
| ZINC70857185 | -33.0441 |
| ZINC70865100 | -46.5783 |
| ZINC70867478 | -38.4506 |
| ZINC70867848 | -40.0698 |
| ZINC70876423 | -28.3036 |
| ZINC70881902 | -42.7986 |
| ZINC70896731 | -49.4216 |
| ZINC70905534 | -44.1125 |
| ZINC70926553 | -42.9151 |
| ZINC70928991 | -45.537  |
| ZINC70929332 | -42.7781 |
| ZINC70929686 | -42.5268 |
| ZINC70932140 | -39.1164 |
| ZINC70933767 | -41.6855 |
| ZINC70997531 | -44.3713 |
| ZINC71016262 | -38.6292 |
| ZINC71019267 | -28.5619 |
| ZINC71024563 | -41.5666 |
| ZINC71047566 | -44.0581 |
| ZINC71075723 | -30.954  |
| ZINC71084535 | -29.8854 |
| ZINC71089180 | -33.35   |
| ZINC71089180 | -33.4284 |
| ZINC71089538 | -41.8606 |
| ZINC71089538 | -42.0986 |
| ZINC71089739 | -37.8666 |
| ZINC71089739 | -40.4957 |
| ZINC71089760 | -46.4942 |
| ZINC71122426 | -41.1399 |
| ZINC71185324 | -46.9229 |
| ZINC71185866 | -36.3631 |
| ZINC71195552 | -43.3772 |



|              |          |
|--------------|----------|
| ZINC71195855 | -38.2587 |
| ZINC71236284 | -39.3055 |
| ZINC71250665 | -27.7471 |
| ZINC71280160 | -46.4559 |
| ZINC71284690 | -28.0267 |
| ZINC71285705 | -35.0705 |
| ZINC71289152 | -28.6457 |
| ZINC71315550 | -24.7566 |
| ZINC71315550 | -28.8883 |
| ZINC71388542 | -36.2565 |
| ZINC71388794 | -44.4768 |
| ZINC71405190 | -48.1051 |
| ZINC71422102 | -46.8992 |
| ZINC71439928 | -29.1733 |
| ZINC71614381 | -43.8872 |
| ZINC71614628 | -35.9977 |
| ZINC71614628 | -45.4678 |
| ZINC71618680 | -33.3062 |
| ZINC71621105 | -27.5796 |
| ZINC71623904 | -33.5575 |
| ZINC71624524 | -28.9026 |
| ZINC71625026 | -31.9777 |
| ZINC71707833 | -42.7922 |
| ZINC71711950 | -34.2882 |
| ZINC71715307 | -46.7072 |
| ZINC71716019 | -35.3958 |
| ZINC71738467 | -34.1283 |
| ZINC71738467 | -35.1327 |
| ZINC71738722 | -36.8721 |
| ZINC71745967 | -23.7251 |
| ZINC71745967 | -30.3122 |
| ZINC71746283 | -27.1972 |
| ZINC71746283 | -29.2836 |
| ZINC71747559 | -33.1316 |
| ZINC71747559 | -40.561  |
| ZINC71751421 | -29.6882 |
| ZINC71752226 | -25.3325 |
| ZINC71753963 | -45.5539 |
| ZINC71756835 | -34.4567 |
| ZINC71758799 | -42.5362 |
| ZINC71760812 | -48.5475 |
| ZINC71761793 | -38.025  |
| ZINC71762918 | -40.6817 |
| ZINC71763882 | -39.4411 |

|              |          |
|--------------|----------|
| ZINC71763882 | -43.5501 |
| ZINC71764168 | -40.7693 |
| ZINC71764740 | -28.5508 |
| ZINC71764928 | -34.6803 |
| ZINC71767424 | -32.0449 |
| ZINC71768770 | -42.6166 |
| ZINC71776236 | -39.6555 |
| ZINC71779412 | -36.5577 |
| ZINC71779802 | -34.6532 |
| ZINC71780773 | -30.8651 |
| ZINC71781059 | -33.8558 |
| ZINC71782402 | -46.078  |
| ZINC71782435 | -29.3185 |
| ZINC71782435 | -31.2119 |
| ZINC71785275 | -38.2234 |
| ZINC71788283 | -38.6508 |
| ZINC71788283 | -40.7772 |
| ZINC71790483 | -27.7121 |
| ZINC71791341 | -38.1912 |
| ZINC71792562 | -43.2243 |
| ZINC71796283 | -46.6224 |
| ZINC71801364 | -32.9405 |
| ZINC71801364 | -42.5808 |
| ZINC71803785 | -30.0819 |
| ZINC71804504 | -37.295  |
| ZINC71806758 | -40.0263 |
| ZINC71808750 | -39.57   |
| ZINC71812712 | -34.2269 |
| ZINC71815413 | -48.1407 |
| ZINC71817165 | -24.5193 |
| ZINC71818836 | -35.0525 |
| ZINC71821454 | -44.0089 |
| ZINC71821455 | -47.9158 |
| ZINC71822306 | -43.9679 |
| ZINC71822583 | -33.0722 |
| ZINC71822583 | -40.1456 |
| ZINC71823792 | -40.6109 |
| ZINC71824132 | -29.717  |
| ZINC71825151 | -37.6195 |
| ZINC71825497 | -38.7869 |
| ZINC71825497 | -41.1638 |
| ZINC71825819 | -38.682  |
| ZINC71825819 | -44.1591 |
| ZINC71827767 | -31.3036 |

|              |          |
|--------------|----------|
| ZINC71834702 | -45.1346 |
| ZINC71840815 | -39.2158 |
| ZINC71840815 | -39.7641 |
| ZINC71851621 | -33.2014 |
| ZINC71852848 | -41.0921 |
| ZINC71854700 | -30.7044 |
| ZINC71854733 | -35.9697 |
| ZINC71860584 | -38.6194 |
| ZINC71864778 | -29.1544 |
| ZINC71864778 | -36.934  |
| ZINC71867019 | -40.1462 |
| ZINC71868107 | -38.5473 |
| ZINC71869756 | -37.5231 |
| ZINC71870192 | -39.7243 |
| ZINC71870408 | -31.9656 |
| ZINC71876085 | -33.7821 |
| ZINC71877530 | -35.0472 |
| ZINC71881937 | -40.0465 |
| ZINC71887787 | -37.643  |
| ZINC71887787 | -49.8199 |
| ZINC71888014 | -39.4083 |
| ZINC71888922 | -40.9347 |
| ZINC71888922 | -41.0761 |
| ZINC71893313 | -37.4653 |
| ZINC71893313 | -42.0486 |
| ZINC71893643 | -32.6879 |
| ZINC71897349 | -34.7323 |
| ZINC71900609 | -35.7229 |
| ZINC71902822 | -38.4464 |
| ZINC71903334 | -40.3505 |
| ZINC71903564 | -38.3129 |
| ZINC71904340 | -29.1796 |
| ZINC71904610 | -34.6041 |
| ZINC71907119 | -23.0112 |
| ZINC71907729 | -35.0591 |
| ZINC71908767 | -37.8778 |
| ZINC71908783 | -41.1633 |
| ZINC71909095 | -42.0406 |
| ZINC71910917 | -47.5087 |
| ZINC71911017 | -32.0016 |
| ZINC71913992 | -41.327  |
| ZINC71913992 | -42.4635 |
| ZINC71914133 | -41.942  |
| ZINC71914133 | -42.0213 |

|              |          |
|--------------|----------|
| ZINC71914375 | -41.6515 |
| ZINC71915094 | -35.0952 |
| ZINC71916386 | -42.1749 |
| ZINC71921522 | -34.0308 |
| ZINC71921522 | -35.0272 |
| ZINC71922025 | -25.354  |
| ZINC71930737 | -45.5014 |
| ZINC71932822 | -29.008  |
| ZINC71933098 | -34.731  |
| ZINC71934015 | -39.9896 |
| ZINC71937868 | -50.2312 |
| ZINC71946763 | -39.1674 |
| ZINC71951458 | -36.738  |
| ZINC71951458 | -41.5195 |
| ZINC71952241 | -29.4877 |
| ZINC71952367 | -42.5194 |
| ZINC71961421 | -26.6398 |
| ZINC71963526 | -48.518  |
| ZINC71966693 | -32.4175 |
| ZINC71968498 | -46.9029 |
| ZINC71975168 | -30.762  |
| ZINC71977052 | -36.2329 |
| ZINC71977198 | -31.973  |
| ZINC71977850 | -31.9843 |
| ZINC71977850 | -36.0299 |
| ZINC71982975 | -44.6554 |
| ZINC72002648 | -29.3596 |
| ZINC72012154 | -46.8825 |
| ZINC72016365 | -31.6227 |
| ZINC72017921 | -31.448  |
| ZINC72020901 | -44.7431 |
| ZINC72023774 | -31.0957 |
| ZINC72024398 | -26.1665 |
| ZINC72037034 | -41.5941 |
| ZINC72042606 | -32.2266 |
| ZINC72042606 | -33.7822 |
| ZINC72049628 | -31.0661 |
| ZINC72055182 | -41.7447 |
| ZINC72057058 | -35.5216 |
| ZINC72057301 | -30.2295 |
| ZINC72061135 | -31.5778 |
| ZINC72063720 | -27.5859 |
| ZINC72065983 | -36.424  |
| ZINC72074260 | -43.3133 |

|              |          |
|--------------|----------|
| ZINC72080200 | -46.8244 |
| ZINC72080839 | -45.2972 |
| ZINC72080961 | -51.0122 |
| ZINC72081068 | -31.9556 |
| ZINC72081331 | -28.779  |
| ZINC72086695 | -39.1354 |
| ZINC72086740 | -45.9204 |
| ZINC72087162 | -32.5491 |
| ZINC72094760 | -44.1733 |
| ZINC72096472 | -33.7374 |
| ZINC72109564 | -38.9483 |
| ZINC72117630 | -30.0362 |
| ZINC72117630 | -35.4774 |
| ZINC72119130 | -36.117  |
| ZINC72119483 | -37.8813 |
| ZINC72133027 | -34.5324 |
| ZINC72135497 | -34.0215 |
| ZINC72139593 | -25.3489 |
| ZINC72139593 | -25.6696 |
| ZINC72140163 | -33.4185 |
| ZINC72140163 | -35.9829 |
| ZINC72140356 | -34.0806 |
| ZINC72142004 | -50.3536 |
| ZINC72144505 | -40.4031 |
| ZINC72144730 | -35.9781 |
| ZINC72144730 | -43.9234 |
| ZINC72148540 | -45.3618 |
| ZINC72148871 | -33.6307 |
| ZINC72148871 | -43.3775 |
| ZINC72149382 | -33.1807 |
| ZINC72149382 | -41.8635 |
| ZINC72150549 | -43.7327 |
| ZINC72150609 | -45.5728 |
| ZINC72157466 | -43.5966 |
| ZINC72160928 | -36.3746 |
| ZINC72161766 | -46.223  |
| ZINC72163587 | -38.9311 |
| ZINC72163587 | -54.7408 |
| ZINC72167403 | -37.0702 |
| ZINC72169109 | -36.7791 |
| ZINC72169287 | -31.0857 |
| ZINC72170029 | -43.9374 |
| ZINC72174294 | -28.49   |
| ZINC72187695 | -33.2538 |

|              |          |
|--------------|----------|
| ZINC72188047 | -25.0821 |
| ZINC72190453 | -29.3754 |
| ZINC72190455 | -31.0514 |
| ZINC72192521 | -29.3807 |
| ZINC72193053 | -29.3802 |
| ZINC72193080 | -29.0134 |
| ZINC72193087 | -32.0015 |
| ZINC72195777 | -30.3738 |
| ZINC72195778 | -30.222  |
| ZINC72195828 | -33.1014 |
| ZINC72196576 | -37.0039 |
| ZINC72196916 | -36.3085 |
| ZINC72197017 | -33.8443 |
| ZINC72197356 | -26.8097 |
| ZINC72197891 | -30.2193 |
| ZINC72197891 | -36.3653 |
| ZINC72197965 | -33.4199 |
| ZINC72198871 | -30.6774 |
| ZINC72198871 | -35.0211 |
| ZINC72201923 | -34.4894 |
| ZINC72203532 | -42.1844 |
| ZINC72231971 | -42.9295 |
| ZINC72232611 | -43.5592 |
| ZINC72232611 | -45.865  |
| ZINC72233293 | -30.1246 |
| ZINC72233741 | -41.3849 |
| ZINC72233818 | -35.4513 |
| ZINC72236419 | -48.3146 |
| ZINC72237976 | -33.5063 |
| ZINC72242111 | -42.0985 |
| ZINC72243267 | -38.492  |
| ZINC72246025 | -35.3688 |
| ZINC72247396 | -41.7804 |
| ZINC72253743 | -39.892  |
| ZINC72253743 | -43.3858 |
| ZINC72255153 | -31.9923 |
| ZINC72255153 | -35.4056 |
| ZINC72255434 | -30.6842 |
| ZINC72255812 | -47.6092 |
| ZINC72255812 | -51.3642 |
| ZINC72263100 | -42.4359 |
| ZINC72263100 | -44.3994 |
| ZINC72264456 | -34.9372 |
| ZINC72264955 | -46.0692 |

|              |          |
|--------------|----------|
| ZINC72268418 | -40.1534 |
| ZINC72268418 | -43.5021 |
| ZINC72274909 | -47.1813 |
| ZINC72275651 | -42.4131 |
| ZINC72275662 | -42.8741 |
| ZINC72275662 | -47.0837 |
| ZINC72276197 | -39.4718 |
| ZINC72276790 | -38.4623 |
| ZINC72276999 | -45.8367 |
| ZINC72277009 | -40.4211 |
| ZINC72278633 | -44.7842 |
| ZINC72281674 | -27.5658 |
| ZINC72283506 | -38.2432 |
| ZINC72284537 | -29.6099 |
| ZINC72285316 | -42.3794 |
| ZINC72285527 | -40.6591 |
| ZINC72287296 | -42.8286 |
| ZINC72291696 | -36.6716 |
| ZINC72291784 | -40.4146 |
| ZINC72291988 | -36.7413 |
| ZINC72294093 | -44.3033 |
| ZINC72294093 | -44.3239 |
| ZINC72301028 | -47.4967 |
| ZINC72302357 | -36.2432 |
| ZINC72302357 | -38.9417 |
| ZINC72302951 | -43.447  |
| ZINC72304224 | -43.924  |
| ZINC72304327 | -38.157  |
| ZINC72304327 | -38.5257 |
| ZINC72305202 | -42.3939 |
| ZINC72306152 | -44.0767 |
| ZINC72306152 | -46.879  |
| ZINC72310193 | -34.7611 |
| ZINC72310715 | -41.4816 |
| ZINC72318932 | -38.7478 |
| ZINC72320311 | -30.774  |
| ZINC72320651 | -26.9182 |
| ZINC72322100 | -28.1711 |
| ZINC72322100 | -44.476  |
| ZINC72324764 | -29.6955 |
| ZINC72324764 | -31.0199 |
| ZINC72334969 | -32.6191 |
| ZINC72335336 | -43.8813 |
| ZINC72335351 | -41.746  |

|              |          |
|--------------|----------|
| ZINC72335617 | -43.3989 |
| ZINC72335617 | -45.4605 |
| ZINC72335853 | -33.2504 |
| ZINC72337085 | -48.7267 |
| ZINC72339273 | -30.2106 |
| ZINC72339648 | -35.5815 |
| ZINC72341609 | -39.2495 |
| ZINC72342496 | -32.1614 |
| ZINC72344201 | -35.1471 |
| ZINC72347817 | -44.9203 |
| ZINC72348687 | -38.4612 |
| ZINC72349612 | -38.4119 |
| ZINC72350229 | -35.5536 |
| ZINC72350875 | -45.8407 |
| ZINC72355565 | -28.7907 |
| ZINC72357688 | -27.0478 |
| ZINC72357688 | -33.5832 |
| ZINC72357886 | -39.1263 |
| ZINC72358621 | -29.2056 |
| ZINC72358621 | -36.9051 |
| ZINC72362180 | -46.3535 |
| ZINC72362521 | -46.6567 |
| ZINC72363141 | -43.2044 |
| ZINC72363221 | -32.0647 |
| ZINC72363221 | -38.4612 |
| ZINC72365750 | -36.7895 |
| ZINC72367940 | -37.394  |
| ZINC72368388 | -42.589  |
| ZINC72369640 | -31.3465 |
| ZINC72373130 | -40.1199 |
| ZINC72375951 | -32.1272 |
| ZINC72377162 | -29.522  |
| ZINC72379352 | -38.3638 |
| ZINC72380353 | -31.8263 |
| ZINC72380353 | -36.3991 |
| ZINC72380646 | -54.3644 |
| ZINC72380646 | -55.674  |
| ZINC72385864 | -37.776  |
| ZINC72389649 | -32.3485 |
| ZINC72389649 | -37.5384 |
| ZINC72391399 | -40.0687 |
| ZINC72392937 | -33.9825 |
| ZINC72392937 | -45.4419 |
| ZINC72393734 | -33.8829 |



|              |          |
|--------------|----------|
| ZINC72397541 | -31.4581 |
| ZINC72397541 | -31.6838 |
| ZINC72397870 | -37.5817 |
| ZINC72398109 | -40.0322 |
| ZINC72398116 | -29.902  |
| ZINC72402440 | -41.7339 |
| ZINC72404206 | -37.131  |
| ZINC72404206 | -37.715  |
| ZINC72405035 | -27.4167 |
| ZINC72408184 | -33.6836 |
| ZINC72408421 | -39.7617 |
| ZINC72409021 | -34.1255 |
| ZINC72410104 | -29.7012 |
| ZINC72410531 | -34.9105 |
| ZINC72411281 | -46.3078 |
| ZINC72412399 | -37.9844 |
| ZINC72412399 | -40.3214 |
| ZINC72414684 | -45.665  |
| ZINC72415385 | -32.0859 |
| ZINC72415385 | -33.0255 |
| ZINC72417905 | -29.4362 |
| ZINC72418590 | -42.5739 |
| ZINC72420541 | -42.2184 |
| ZINC72421924 | -32.9761 |
| ZINC72423037 | -36.0364 |
| ZINC72423520 | -41.2194 |
| ZINC72423654 | -38.9659 |
| ZINC72427368 | -34.1984 |
| ZINC72432469 | -33.0081 |
| ZINC72432469 | -36.9944 |
| ZINC72435508 | -38.769  |
| ZINC72435847 | -34.0371 |
| ZINC72435847 | -36.1566 |
| ZINC72438149 | -33.0738 |
| ZINC72438783 | -42.8515 |
| ZINC72443346 | -32.9177 |
| ZINC72443350 | -34.0336 |
| ZINC72443929 | -40.3508 |
| ZINC72449070 | -35.8545 |
| ZINC72455413 | -36.7942 |
| ZINC72455907 | -45.7705 |
| ZINC72457942 | -30.8774 |
| ZINC72459712 | -23.9064 |
| ZINC72459752 | -26.0738 |

|              |          |
|--------------|----------|
| ZINC72467393 | -34.6285 |
| ZINC72467539 | -44.1491 |
| ZINC72469270 | -34.1351 |
| ZINC72470667 | -38.5809 |
| ZINC72470667 | -41.9481 |
| ZINC72470860 | -43.9458 |
| ZINC72470860 | -44.6031 |
| ZINC72473236 | -39.3654 |
| ZINC72474964 | -44.3634 |
| ZINC72475889 | -46.4612 |
| ZINC72479160 | -33.3935 |
| ZINC72481243 | -24.6326 |
| ZINC72481328 | -36.5011 |
| ZINC72481328 | -40.9518 |
| ZINC72483485 | -36.1336 |
| ZINC72487517 | -39.2284 |
| ZINC72487553 | -39.6866 |
| ZINC72488848 | -22.491  |
| ZINC72489991 | -38.8358 |
| ZINC72499353 | -39.7087 |
| ZINC72508772 | -44.6591 |
| ZINC72509173 | -39.1081 |
| ZINC72513958 | -38.6281 |
| ZINC72513958 | -41.6003 |
| ZINC72514086 | -31.7375 |
| ZINC72514086 | -32.5381 |
| ZINC72518377 | -38.9471 |
| ZINC72518377 | -43.8832 |
| ZINC72529562 | -40.7168 |
| ZINC72533591 | -31.6728 |
| ZINC72538424 | -34.2984 |
| ZINC72539348 | -46.1182 |
| ZINC72539362 | -47.6613 |
| ZINC72546667 | -35.3261 |
| ZINC72557580 | -37.5151 |
| ZINC72557580 | -39.2559 |
| ZINC72562462 | -34.5748 |
| ZINC72573937 | -43.6207 |
| ZINC72575308 | -41.2104 |
| ZINC72575320 | -38.0244 |
| ZINC72578304 | -35.4138 |
| ZINC72578304 | -39.9786 |
| ZINC72578320 | -43.2707 |
| ZINC72578320 | -43.9041 |

|              |          |
|--------------|----------|
| ZINC72591878 | -36.8217 |
| ZINC72596186 | -48.9133 |
| ZINC72596612 | -37.2752 |
| ZINC72605407 | -40.568  |
| ZINC72614742 | -38.3654 |
| ZINC72622689 | -44.7942 |
| ZINC72632646 | -38.0751 |
| ZINC72633391 | -30.8144 |
| ZINC72639997 | -40.9749 |
| ZINC72647119 | -47.9461 |
| ZINC72649815 | -33.6515 |
| ZINC72652123 | -48.3215 |
| ZINC72661551 | -40.983  |
| ZINC72663152 | -37.4073 |
| ZINC72665785 | -33.8252 |
| ZINC72665785 | -39.8321 |
| ZINC72670171 | -39.1645 |
| ZINC72670171 | -40.5683 |
| ZINC72672816 | -42.852  |
| ZINC72677537 | -36.9854 |
| ZINC72684361 | -40.8089 |
| ZINC72684361 | -43.0894 |
| ZINC72685075 | -32.5882 |
| ZINC72685075 | -40.2759 |
| ZINC72686458 | -39.197  |
| ZINC72690429 | -45.3313 |
| ZINC72692141 | -40.0394 |
| ZINC72697944 | -35.8172 |
| ZINC72698771 | -36.6628 |
| ZINC72698771 | -36.9526 |
| ZINC72705508 | -40.4709 |
| ZINC72707160 | -38.8619 |
| ZINC72725763 | -39.3477 |
| ZINC72727445 | -30.9205 |
| ZINC72730215 | -36.86   |
| ZINC72730371 | -41.241  |
| ZINC72733440 | -40.2819 |
| ZINC72739518 | -41.6415 |
| ZINC72741074 | -44.4223 |
| ZINC72742306 | -41.1553 |
| ZINC72745017 | -42.1083 |
| ZINC72748029 | -37.49   |
| ZINC72760046 | -47.027  |
| ZINC72760046 | -47.367  |

|              |          |
|--------------|----------|
| ZINC72767186 | -28.0791 |
| ZINC72774171 | -33.0685 |
| ZINC72774171 | -37.1931 |
| ZINC72774933 | -35.2315 |
| ZINC72776506 | -29.0595 |
| ZINC72778788 | -41.4635 |
| ZINC72793345 | -42.8582 |
| ZINC72794844 | -32.8378 |
| ZINC72795144 | -24.2325 |
| ZINC72795144 | -37.6201 |
| ZINC72795719 | -37.1865 |
| ZINC72795719 | -42.6003 |
| ZINC72797358 | -41.5249 |
| ZINC72797814 | -35.4418 |
| ZINC72800012 | -27.2626 |
| ZINC72802453 | -45.0717 |
| ZINC72802453 | -48.2715 |
| ZINC72802516 | -41.8661 |
| ZINC72802984 | -37.7795 |
| ZINC72802984 | -38.509  |
| ZINC72805476 | -36.9073 |
| ZINC72806173 | -42.6537 |
| ZINC72806922 | -37.778  |
| ZINC72810741 | -36.9036 |
| ZINC72812465 | -34.9521 |
| ZINC72813784 | -38.4883 |
| ZINC72813952 | -38.1373 |
| ZINC72816456 | -44.2793 |
| ZINC72816456 | -50.3374 |
| ZINC72817366 | -36.4216 |
| ZINC72817377 | -36.1795 |
| ZINC72817597 | -43.7773 |
| ZINC72817597 | -47.7273 |
| ZINC72818073 | -45.2393 |
| ZINC72824636 | -45.8543 |
| ZINC72824688 | -44.4576 |
| ZINC72825413 | -39.8856 |
| ZINC72826909 | -38.6671 |
| ZINC72832460 | -32.0289 |
| ZINC72832460 | -39.5062 |
| ZINC72833591 | -35.3542 |
| ZINC72833591 | -39.5363 |
| ZINC72834786 | -41.6261 |
| ZINC72838301 | -40.5566 |

|              |          |
|--------------|----------|
| ZINC72838786 | -43.0698 |
| ZINC72841954 | -41.8611 |
| ZINC72844385 | -45.2295 |
| ZINC72844385 | -49.2788 |
| ZINC72844389 | -37.4441 |
| ZINC72845100 | -41.3064 |
| ZINC72846922 | -35.1105 |
| ZINC72847137 | -38.2222 |
| ZINC72847360 | -32.8881 |
| ZINC72852156 | -39.5502 |
| ZINC72856486 | -41.8477 |
| ZINC72858151 | -42.7784 |
| ZINC72858151 | -42.9315 |
| ZINC72867344 | -35.4451 |
| ZINC72867344 | -50.0356 |
| ZINC72877902 | -44.7612 |
| ZINC72887514 | -49.2255 |
| ZINC72894210 | -35.7456 |
| ZINC72894661 | -37.426  |
| ZINC72895494 | -30.5804 |
| ZINC72895494 | -35.9104 |
| ZINC72895839 | -41.9386 |
| ZINC72896846 | -37.1643 |
| ZINC72899460 | -33.3335 |
| ZINC72899460 | -37.3646 |
| ZINC72900185 | -36.2941 |
| ZINC72900197 | -42.6735 |
| ZINC72908734 | -41.4696 |
| ZINC72908734 | -42.074  |
| ZINC72909016 | -40.2589 |
| ZINC72909972 | -32.2922 |
| ZINC72910028 | -39.3889 |
| ZINC72912717 | -41.2312 |
| ZINC72915480 | -43.9685 |
| ZINC72917300 | -41.7061 |
| ZINC72917905 | -42.4012 |
| ZINC72918852 | -29.3439 |
| ZINC72925169 | -38.79   |
| ZINC72926014 | -46.0459 |
| ZINC72926014 | -48.8722 |
| ZINC72932088 | -39.2852 |
| ZINC72945728 | -37.8999 |
| ZINC72948396 | -28.1426 |
| ZINC72948396 | -35.9269 |

|              |          |
|--------------|----------|
| ZINC72952746 | -37.4801 |
| ZINC72952746 | -40.1811 |
| ZINC72966155 | -32.3412 |
| ZINC72966155 | -39.7455 |
| ZINC72966954 | -39.065  |
| ZINC72968567 | -40.3065 |
| ZINC72980101 | -36.9725 |
| ZINC72983124 | -36.7093 |
| ZINC72983124 | -36.777  |
| ZINC72984106 | -38.0487 |
| ZINC72986714 | -40.5331 |
| ZINC72989606 | -45.845  |
| ZINC72990619 | -36.5106 |
| ZINC72997355 | -41.0159 |
| ZINC72997474 | -46.0077 |
| ZINC72997948 | -34.9479 |
| ZINC73016142 | -39.0459 |
| ZINC73017584 | -40.1898 |
| ZINC73021336 | -36.9935 |
| ZINC73024065 | -36.923  |
| ZINC73028051 | -38.1745 |
| ZINC73028051 | -40.4066 |
| ZINC73031875 | -42.6297 |
| ZINC73035646 | -46.511  |
| ZINC73048064 | -45.2078 |
| ZINC73052818 | -38.6302 |
| ZINC73058753 | -48.6951 |
| ZINC73063900 | -41.1829 |
| ZINC73066389 | -37.3685 |
| ZINC73075526 | -36.6471 |
| ZINC73076694 | -44.3438 |
| ZINC73085070 | -37.5737 |
| ZINC73085548 | -45.8658 |
| ZINC73086209 | -38.8489 |
| ZINC73087359 | -50.5204 |
| ZINC73089686 | -41.7453 |
| ZINC73096445 | -45.49   |
| ZINC73098472 | -43.1511 |
| ZINC73099272 | -45.7099 |
| ZINC73103046 | -44.9179 |
| ZINC73104202 | -35.4969 |
| ZINC73104202 | -38.4055 |
| ZINC73106915 | -32.9615 |
| ZINC73106915 | -36.6004 |

|              |          |
|--------------|----------|
| ZINC73110614 | -35.1828 |
| ZINC73115177 | -43.0162 |
| ZINC73122341 | -39.5638 |
| ZINC73122552 | -38.0377 |
| ZINC73123248 | -42.0143 |
| ZINC73123932 | -34.8022 |
| ZINC73124232 | -40.9413 |
| ZINC73124410 | -42.1211 |
| ZINC73124866 | -33.7305 |
| ZINC73124866 | -38.1005 |
| ZINC73125075 | -41.3659 |
| ZINC73125075 | -47.4151 |
| ZINC73131611 | -36.337  |
| ZINC73132897 | -34.5403 |
| ZINC73132897 | -37.5865 |
| ZINC73139132 | -38.8708 |
| ZINC73139334 | -46.3064 |
| ZINC73163427 | -39.1996 |
| ZINC73165145 | -43.5382 |
| ZINC73165321 | -33.6276 |
| ZINC73165321 | -38.7424 |
| ZINC73167212 | -38.2613 |
| ZINC73171348 | -40.9949 |
| ZINC73179311 | -39.441  |
| ZINC73186107 | -34.7215 |
| ZINC73186440 | -36.1449 |
| ZINC73186477 | -39.9462 |
| ZINC73186707 | -38.234  |
| ZINC73193960 | -43.6651 |
| ZINC73195383 | -40.5567 |
| ZINC73195531 | -40.8459 |
| ZINC73195531 | -42.9513 |
| ZINC73202997 | -33.5043 |
| ZINC73221423 | -43.2832 |
| ZINC73227124 | -40.0337 |
| ZINC73233786 | -38.8924 |
| ZINC73235697 | -42.3201 |
| ZINC73235697 | -42.5168 |
| ZINC73244920 | -42.1581 |
| ZINC73250935 | -40.5579 |
| ZINC73251224 | -34.8322 |
| ZINC73256859 | -37.0983 |
| ZINC73269267 | -40.9054 |
| ZINC73274975 | -35.9721 |

|              |          |
|--------------|----------|
| ZINC73274975 | -40.6574 |
| ZINC73284358 | -44.4903 |
| ZINC73284358 | -46.1934 |
| ZINC73287011 | -40.0507 |
| ZINC73291464 | -39.9378 |
| ZINC73291464 | -41.1799 |
| ZINC73292750 | -41.1597 |
| ZINC73293926 | -40.7356 |
| ZINC73302771 | -37.2187 |
| ZINC73303253 | -34.5465 |
| ZINC73309845 | -36.9663 |
| ZINC73310142 | -41.1531 |
| ZINC73314181 | -29.3347 |
| ZINC73319615 | -40.1299 |
| ZINC73325748 | -29.3926 |
| ZINC73327563 | -38.0092 |
| ZINC73332129 | -41.1693 |
| ZINC73332501 | -36.5249 |
| ZINC73338623 | -37.199  |
| ZINC73338623 | -42.0951 |
| ZINC73342199 | -41.4617 |
| ZINC73342199 | -44.5355 |
| ZINC73344235 | -39.0246 |
| ZINC73346684 | -39.1833 |
| ZINC73347021 | -41.1341 |
| ZINC73348461 | -42.1378 |
| ZINC73349388 | -38.6726 |
| ZINC73351242 | -34.6541 |
| ZINC73351592 | -40.5058 |
| ZINC73352149 | -38.6894 |
| ZINC73353051 | -42.8148 |
| ZINC73358666 | -37.2403 |
| ZINC73358666 | -40.1237 |
| ZINC73358684 | -38.781  |
| ZINC73363322 | -35.9761 |
| ZINC73363947 | -41.5965 |
| ZINC73364510 | -36.3705 |
| ZINC73364510 | -37.6641 |
| ZINC73374441 | -44.5254 |
| ZINC73374781 | -41.9422 |
| ZINC73381673 | -42.4497 |
| ZINC73381903 | -36.4076 |
| ZINC73381962 | -46.3575 |
| ZINC73381962 | -48.8211 |



|              |          |
|--------------|----------|
| ZINC73390077 | -38.767  |
| ZINC73398758 | -38.0496 |
| ZINC73405215 | -39.7353 |
| ZINC73420618 | -40.0145 |
| ZINC73431195 | -45.5518 |
| ZINC73432572 | -44.2948 |
| ZINC73433205 | -41.768  |
| ZINC73458086 | -42.145  |
| ZINC73462695 | -35.6988 |
| ZINC73463183 | -42.2693 |
| ZINC73463299 | -34.8182 |
| ZINC73463299 | -37.6614 |
| ZINC73469950 | -36.8757 |
| ZINC73469950 | -38.7012 |
| ZINC73471202 | -41.7213 |
| ZINC73473868 | -37.1152 |
| ZINC73474879 | -41.6556 |
| ZINC73479057 | -37.1005 |
| ZINC73479057 | -38.4657 |
| ZINC73489572 | -41.9241 |
| ZINC73490113 | -33.7458 |
| ZINC73490456 | -34.9954 |
| ZINC73490456 | -36.7452 |
| ZINC73495808 | -47.3146 |
| ZINC73496195 | -30.3641 |
| ZINC73498180 | -33.7572 |
| ZINC73498180 | -41.9511 |
| ZINC73503737 | -35.8423 |
| ZINC73507134 | -30.9354 |
| ZINC73512804 | -38.3443 |
| ZINC73516135 | -39.0882 |
| ZINC73517334 | -35.3746 |
| ZINC73518748 | -39.1538 |
| ZINC73519192 | -41.1832 |
| ZINC73523983 | -33.8608 |
| ZINC73524900 | -37.048  |
| ZINC73524900 | -46.9396 |
| ZINC73526135 | -38.3119 |
| ZINC73530102 | -45.3192 |
| ZINC73532402 | -39.1462 |
| ZINC73532402 | -42.6288 |
| ZINC73534088 | -39.307  |
| ZINC73534088 | -40.9943 |
| ZINC73540780 | -33.8846 |

|              |          |
|--------------|----------|
| ZINC73544516 | -42.2847 |
| ZINC73544793 | -42.9675 |
| ZINC73550040 | -38.6022 |
| ZINC73553644 | -34.3618 |
| ZINC73566686 | -37.0818 |
| ZINC73566696 | -39.2764 |
| ZINC73566696 | -43.1108 |
| ZINC73585161 | -35.1424 |
| ZINC73601331 | -39.1311 |
| ZINC73601436 | -38.4129 |
| ZINC73602872 | -30.731  |
| ZINC73603186 | -42.5186 |
| ZINC73603448 | -38.8715 |
| ZINC73604776 | -44.1786 |
| ZINC73606033 | -33.4157 |
| ZINC73612836 | -35.9582 |
| ZINC73624720 | -37.7615 |
| ZINC73640314 | -35.9043 |
| ZINC73641934 | -42.813  |
| ZINC73646591 | -40.3122 |
| ZINC73646591 | -42.6915 |
| ZINC73647917 | -38.2076 |
| ZINC73648014 | -44.2257 |
| ZINC73649670 | -38.9483 |
| ZINC73665210 | -42.7664 |
| ZINC73665545 | -26.8242 |
| ZINC73667416 | -37.9154 |
| ZINC73668257 | -40.121  |
| ZINC73677241 | -37.9965 |
| ZINC73678649 | -35.1903 |
| ZINC73678701 | -33.8313 |
| ZINC73680949 | -52.0146 |
| ZINC73682132 | -37.9574 |
| ZINC73682623 | -36.9095 |
| ZINC73682623 | -47.8686 |
| ZINC73687058 | -44.5389 |
| ZINC73690608 | -43.5293 |
| ZINC73694595 | -43.432  |
| ZINC73696213 | -39.6046 |
| ZINC73696367 | -37.9376 |
| ZINC73709541 | -43.3109 |
| ZINC73709541 | -48.8212 |
| ZINC73710608 | -39.3448 |
| ZINC73710608 | -49.763  |

|              |          |
|--------------|----------|
| ZINC73717730 | -41.9605 |
| ZINC73719372 | -37.28   |
| ZINC73731510 | -32.5483 |
| ZINC73731723 | -44.1675 |
| ZINC73739130 | -36.8332 |
| ZINC73739624 | -32.7277 |
| ZINC73739624 | -37.5912 |
| ZINC73741477 | -35.0762 |
| ZINC73746998 | -35.8452 |
| ZINC73749141 | -45.6676 |
| ZINC73750261 | -46.0435 |
| ZINC73751000 | -43.9153 |
| ZINC73757193 | -43.7529 |
| ZINC73757514 | -40.09   |
| ZINC73763666 | -37.0716 |
| ZINC73766779 | -37.728  |
| ZINC73770402 | -42.2505 |
| ZINC73771012 | -36.0776 |
| ZINC73772089 | -40.4375 |
| ZINC73775191 | -43.6681 |
| ZINC73775322 | -38.1254 |
| ZINC73775489 | -41.7357 |
| ZINC73775715 | -43.2282 |
| ZINC73778864 | -40.7006 |
| ZINC73784640 | -35.0569 |
| ZINC73790399 | -40.7337 |
| ZINC73790404 | -32.2069 |
| ZINC73791364 | -48.9561 |
| ZINC73802095 | -46.6153 |
| ZINC73823507 | -32.0562 |
| ZINC73827976 | -46.3751 |
| ZINC73828224 | -34.2645 |
| ZINC73829755 | -43.4525 |
| ZINC73835932 | -32.4892 |
| ZINC73837161 | -41.8193 |
| ZINC73848230 | -39.8384 |
| ZINC73848424 | -38.5661 |
| ZINC73851558 | -41.1643 |
| ZINC73852103 | -39.4222 |
| ZINC73852968 | -35.1303 |
| ZINC73857958 | -46.9805 |
| ZINC73865952 | -53.5112 |
| ZINC73871941 | -33.9167 |
| ZINC73880054 | -43.8864 |

|              |          |
|--------------|----------|
| ZINC73880054 | -43.9843 |
| ZINC73880815 | -43.2963 |
| ZINC73887622 | -36.3288 |
| ZINC73890942 | -37.976  |
| ZINC73892196 | -41.3761 |
| ZINC73900703 | -47.3992 |
| ZINC73900813 | -39.6021 |
| ZINC73901025 | -36.1888 |
| ZINC73902119 | -45.1395 |
| ZINC73909930 | -39.0539 |
| ZINC73920704 | -37.0345 |
| ZINC73920704 | -39.3245 |
| ZINC73922181 | -39.6543 |
| ZINC73922181 | -45.737  |
| ZINC73922314 | -38.8793 |
| ZINC73937708 | -41.9522 |
| ZINC73937708 | -43.2627 |
| ZINC73938108 | -40.0314 |
| ZINC73938109 | -37.1517 |
| ZINC73950274 | -35.3954 |
| ZINC73950274 | -49.9627 |
| ZINC73952073 | -37.846  |
| ZINC73952831 | -45.8269 |
| ZINC73953124 | -46.7173 |
| ZINC73954957 | -39.2329 |
| ZINC73957439 | -37.8666 |
| ZINC73957439 | -41.8223 |
| ZINC73967331 | -41.3686 |
| ZINC73973089 | -43.5126 |
| ZINC73973089 | -57.1056 |
| ZINC73987354 | -38.8394 |
| ZINC73992980 | -35.8397 |
| ZINC73993555 | -46.9065 |
| ZINC73998586 | -41.5644 |
| ZINC73999035 | -39.5065 |
| ZINC74008289 | -40.8603 |
| ZINC74017248 | -45.3978 |
| ZINC74022334 | -37.6126 |
| ZINC74049929 | -38.2959 |
| ZINC74054058 | -46.1041 |
| ZINC74055248 | -37.7308 |
| ZINC74057727 | -33.8024 |
| ZINC74059201 | -31.4623 |
| ZINC74060957 | -37.1993 |

|              |          |
|--------------|----------|
| ZINC74061896 | -42.2396 |
| ZINC74062089 | -38.3582 |
| ZINC74062599 | -44.4083 |
| ZINC74064516 | -45.2884 |
| ZINC74068763 | -50.4955 |
| ZINC74072823 | -44.946  |
| ZINC74074382 | -43.0089 |
| ZINC74087590 | -39.7753 |
| ZINC74087590 | -42.8634 |
| ZINC74098118 | -36.4587 |
| ZINC74099654 | -32.1496 |
| ZINC74104814 | -43.8452 |
| ZINC74104814 | -46.2926 |
| ZINC74106077 | -41.6065 |
| ZINC74107982 | -41.5495 |
| ZINC74107982 | -43.879  |
| ZINC74125465 | -39.3945 |
| ZINC74125465 | -42.4757 |
| ZINC74127497 | -35.7016 |
| ZINC74127497 | -36.736  |
| ZINC74137498 | -35.2493 |
| ZINC74143809 | -34.8294 |
| ZINC74159308 | -41.3443 |
| ZINC74162297 | -50.5055 |
| ZINC74162694 | -38.6796 |
| ZINC74176776 | -43.3042 |
| ZINC74190231 | -41.1356 |
| ZINC74194624 | -37.4517 |
| ZINC74201290 | -34.5166 |
| ZINC74201290 | -36.5059 |
| ZINC74208245 | -50.9141 |
| ZINC74210987 | -37.1822 |
| ZINC74212698 | -40.8849 |
| ZINC74216801 | -49.0675 |
| ZINC74228778 | -39.5288 |
| ZINC74235417 | -40.6514 |
| ZINC74238854 | -43.4333 |
| ZINC74251608 | -38.7847 |
| ZINC74251608 | -40.5339 |
| ZINC74252656 | -40.3216 |
| ZINC74257588 | -41.3914 |
| ZINC74259871 | -39.4366 |
| ZINC74264083 | -44.8433 |
| ZINC74264504 | -39.9569 |

|              |          |
|--------------|----------|
| ZINC74269493 | -40.0859 |
| ZINC74272352 | -39.121  |
| ZINC74276797 | -36.0614 |
| ZINC74283368 | -37.4077 |
| ZINC74284535 | -34.059  |
| ZINC74289393 | -43.879  |
| ZINC74298374 | -46.6282 |
| ZINC74301624 | -36.0416 |
| ZINC74301626 | -43.5125 |
| ZINC74301927 | -46.5678 |
| ZINC74301949 | -45.4349 |
| ZINC74315041 | -40.554  |
| ZINC74315123 | -39.3404 |
| ZINC74316103 | -45.7749 |
| ZINC74323390 | -39.0551 |
| ZINC74327456 | -40.1175 |
| ZINC74328460 | -48.13   |
| ZINC74350729 | -38.4351 |
| ZINC74350729 | -43.5928 |
| ZINC74351885 | -43.8692 |
| ZINC74353813 | -45.2799 |
| ZINC74355321 | -34.4218 |
| ZINC74359484 | -46.0629 |
| ZINC74363796 | -38.175  |
| ZINC74369968 | -32.4892 |
| ZINC74372524 | -35.0979 |
| ZINC74372524 | -36.6857 |
| ZINC74372524 | -40.701  |
| ZINC74387334 | -37.7126 |
| ZINC74393594 | -29.2396 |
| ZINC74393594 | -33.864  |
| ZINC74393906 | -37.1265 |
| ZINC74394170 | -38.2854 |
| ZINC74394731 | -35.7193 |
| ZINC74397219 | -37.7355 |
| ZINC74397798 | -37.2438 |
| ZINC74400424 | -37.464  |
| ZINC74409321 | -38.8444 |
| ZINC74419091 | -41.6525 |
| ZINC74423774 | -32.4717 |
| ZINC74426089 | -42.5664 |
| ZINC74426089 | -43.9314 |
| ZINC74426121 | -43.3738 |
| ZINC74426121 | -44.3765 |

|              |          |
|--------------|----------|
| ZINC74434031 | -47.2366 |
| ZINC74439978 | -32.3023 |
| ZINC74439978 | -41.8724 |
| ZINC74440422 | -39.4212 |
| ZINC74440835 | -43.105  |
| ZINC74440835 | -49.2716 |
| ZINC74446542 | -39.3648 |
| ZINC74451214 | -41.3632 |
| ZINC74458600 | -42.8236 |
| ZINC74458652 | -44.9639 |
| ZINC74464348 | -40.45   |
| ZINC74464348 | -44.0433 |
| ZINC74464593 | -38.3303 |
| ZINC74464720 | -37.5989 |
| ZINC74467731 | -38.9003 |
| ZINC74474218 | -43.5211 |
| ZINC74476619 | -40.7226 |
| ZINC74484922 | -37.7498 |
| ZINC74491825 | -34.8887 |
| ZINC74499672 | -37.138  |
| ZINC74504273 | -44.446  |
| ZINC74505311 | -42.9324 |
| ZINC74506298 | -40.3248 |
| ZINC74515387 | -45.3293 |
| ZINC74519030 | -31.0544 |
| ZINC74519334 | -40.0621 |
| ZINC74521531 | -30.9576 |
| ZINC74525003 | -37.0751 |
| ZINC74525444 | -46.516  |
| ZINC74532797 | -41.8549 |
| ZINC74559200 | -37.1972 |
| ZINC74562318 | -43.3781 |
| ZINC74562894 | -44.5134 |
| ZINC74569622 | -47.9963 |
| ZINC74584959 | -46.6186 |
| ZINC74605741 | -45.0395 |
| ZINC74608752 | -42.8975 |
| ZINC74615161 | -37.8027 |
| ZINC74619011 | -35.4861 |
| ZINC74619452 | -38.7861 |
| ZINC74639734 | -36.2736 |
| ZINC74640579 | -28.6531 |
| ZINC74641007 | -35.3762 |
| ZINC74641176 | -46.2408 |

|              |          |
|--------------|----------|
| ZINC74645757 | -46.7745 |
| ZINC74646702 | -35.2839 |
| ZINC74658310 | -31.5119 |
| ZINC74658538 | -37.525  |
| ZINC74663817 | -36.7223 |
| ZINC74665414 | -41.9732 |
| ZINC74665937 | -42.6409 |
| ZINC74679581 | -41.8666 |
| ZINC74679844 | -38.9047 |
| ZINC74687488 | -46.7391 |
| ZINC74691208 | -32.7414 |
| ZINC74691208 | -41.9648 |
| ZINC74710732 | -42.5541 |
| ZINC74712443 | -26.1296 |
| ZINC74719743 | -39.8242 |
| ZINC74720380 | -34.7124 |
| ZINC74722639 | -38.3678 |
| ZINC74722639 | -40.7727 |
| ZINC74723026 | -33.0209 |
| ZINC74729391 | -45.5055 |
| ZINC74736250 | -39.6329 |
| ZINC74744950 | -41.4981 |
| ZINC74759909 | -32.718  |
| ZINC74760248 | -38.9441 |
| ZINC74762234 | -38.8442 |
| ZINC74763119 | -40.551  |
| ZINC74764038 | -39.199  |
| ZINC74770217 | -33.7173 |
| ZINC74770217 | -35.9646 |
| ZINC74773474 | -44.1492 |
| ZINC74776505 | -37.5325 |
| ZINC74776507 | -35.3281 |
| ZINC74777162 | -36.9863 |
| ZINC74779633 | -41.8279 |
| ZINC74780355 | -33.9347 |
| ZINC74780411 | -45.1821 |
| ZINC74784107 | -44.135  |
| ZINC74784107 | -49.9724 |
| ZINC74790109 | -40.8153 |
| ZINC74811977 | -41.0513 |
| ZINC74828110 | -41.0922 |
| ZINC74830894 | -41.6955 |
| ZINC74830894 | -49.8459 |
| ZINC74837565 | -36.5656 |



|              |          |
|--------------|----------|
| ZINC74844085 | -42.5913 |
| ZINC74845691 | -41.4007 |
| ZINC74846692 | -47.9511 |
| ZINC74851188 | -42.6862 |
| ZINC74874941 | -38.9214 |
| ZINC74874941 | -44.581  |
| ZINC74874945 | -36.7708 |
| ZINC74912089 | -37.5244 |
| ZINC74912089 | -43.1688 |
| ZINC74916373 | -44.5698 |
| ZINC74926046 | -36.7684 |
| ZINC74930090 | -38.5132 |
| ZINC74934187 | -37.4656 |
| ZINC74941257 | -36.8143 |
| ZINC74941573 | -32.6219 |
| ZINC74941599 | -38.7286 |
| ZINC74943540 | -32.0927 |
| ZINC74943852 | -34.5498 |
| ZINC74973268 | -38.9141 |
| ZINC74975889 | -39.4044 |
| ZINC74980847 | -36.8346 |
| ZINC74980847 | -40.2305 |
| ZINC74992294 | -39.187  |
| ZINC74993593 | -38.9023 |
| ZINC74996816 | -41.2197 |
| ZINC75021364 | -32.6459 |
| ZINC75046613 | -41.0852 |
| ZINC75052907 | -42.7572 |
| ZINC75054788 | -36.6379 |
| ZINC75057364 | -39.4915 |
| ZINC75064318 | -44.612  |
| ZINC75064348 | -40.5832 |
| ZINC75078295 | -30.4189 |
| ZINC75092182 | -45.7665 |
| ZINC75092255 | -31.8159 |
| ZINC75092255 | -34.2225 |
| ZINC75092936 | -36.1865 |
| ZINC75092936 | -38.2873 |
| ZINC75099844 | -37.9577 |
| ZINC75099973 | -39.3601 |
| ZINC75100199 | -42.7307 |
| ZINC75106257 | -29.1863 |
| ZINC75111052 | -43.4163 |
| ZINC75116390 | -35.0235 |

|              |          |
|--------------|----------|
| ZINC75123551 | -39.4069 |
| ZINC75126782 | -43.3031 |
| ZINC75130669 | -31.9633 |
| ZINC75157978 | -49.8075 |
| ZINC75158847 | -36.3151 |
| ZINC75158862 | -41.0627 |
| ZINC75164450 | -38.3634 |
| ZINC75164450 | -43.9059 |
| ZINC75164864 | -40.0025 |
| ZINC75165320 | -39.4517 |
| ZINC75165320 | -44.5052 |
| ZINC75166033 | -42.2273 |
| ZINC75171898 | -41.0662 |
| ZINC75178722 | -49.0813 |
| ZINC75178808 | -44.0775 |
| ZINC75181322 | -36.5676 |
| ZINC75194014 | -41.6262 |
| ZINC75221440 | -35.6921 |
| ZINC75226288 | -44.5875 |
| ZINC75236611 | -38.0536 |
| ZINC75237239 | -35.5447 |
| ZINC75237419 | -40.7097 |
| ZINC75237419 | -41.9519 |
| ZINC75239573 | -29.5278 |
| ZINC75239573 | -36.5324 |
| ZINC75240092 | -41.6255 |
| ZINC75248053 | -38.4096 |
| ZINC75249964 | -32.1247 |
| ZINC75253713 | -40.7707 |
| ZINC75267074 | -36.691  |
| ZINC75269103 | -46.1908 |
| ZINC75269998 | -49.2357 |
| ZINC75277376 | -38.109  |
| ZINC75280193 | -35.9124 |
| ZINC75286979 | -41.0566 |
| ZINC75288341 | -31.8918 |
| ZINC75292790 | -30.1275 |
| ZINC75292790 | -36.6643 |
| ZINC75292956 | -27.5302 |
| ZINC75295598 | -40.1349 |
| ZINC75299566 | -31.3202 |
| ZINC75299566 | -32.5019 |
| ZINC75299803 | -36.9488 |
| ZINC75300078 | -34.5952 |

|              |          |
|--------------|----------|
| ZINC75300260 | -41.8429 |
| ZINC75317305 | -41.2428 |
| ZINC75337073 | -43.7693 |
| ZINC75339301 | -36.8925 |
| ZINC75340256 | -39.3293 |
| ZINC75348275 | -46.4887 |
| ZINC75353201 | -40.5648 |
| ZINC75360476 | -36.1115 |
| ZINC75369837 | -43.1234 |
| ZINC75378859 | -34.245  |
| ZINC75383730 | -36.2459 |
| ZINC75386375 | -28.2349 |
| ZINC75386375 | -34.4414 |
| ZINC75387359 | -43.7382 |
| ZINC75387874 | -41.5824 |
| ZINC75392336 | -42.9527 |
| ZINC75398817 | -32.6208 |
| ZINC75407531 | -34.1951 |
| ZINC75415902 | -46.3228 |
| ZINC75433463 | -43.2502 |
| ZINC75435842 | -43.3671 |
| ZINC75440877 | -31.3678 |
| ZINC75440881 | -35.5143 |
| ZINC75445420 | -40.651  |
| ZINC75446281 | -41.8667 |
| ZINC75447831 | -38.5461 |
| ZINC75447831 | -39.8151 |
| ZINC75449526 | -35.1211 |
| ZINC75456908 | -40.9548 |
| ZINC75456908 | -43.3305 |
| ZINC75462159 | -33.4482 |
| ZINC75463769 | -38.0905 |
| ZINC75467324 | -29.0016 |
| ZINC75478232 | -43.1734 |
| ZINC75481425 | -28.7112 |
| ZINC75486440 | -43.8463 |
| ZINC75493528 | -50.8402 |
| ZINC75503844 | -31.3881 |
| ZINC75504327 | -41.1126 |
| ZINC75508802 | -34.9209 |
| ZINC75509742 | -42.5425 |
| ZINC75533375 | -38.8716 |
| ZINC75533642 | -37.1412 |
| ZINC75534151 | -39.1315 |

|              |          |
|--------------|----------|
| ZINC75534151 | -39.4583 |
| ZINC75535777 | -37.6328 |
| ZINC75543959 | -32.9844 |
| ZINC75543959 | -39.2617 |
| ZINC75544708 | -36.8197 |
| ZINC75546343 | -40.8034 |
| ZINC75547019 | -34.7748 |
| ZINC75547358 | -49.7897 |
| ZINC75558090 | -31.6447 |
| ZINC75559235 | -40.8475 |
| ZINC75560725 | -29.0604 |
| ZINC75561505 | -39.4106 |
| ZINC75561505 | -44.698  |
| ZINC75563734 | -36.4387 |
| ZINC75570427 | -45.4901 |
| ZINC75571976 | -43.828  |
| ZINC75578053 | -42.2378 |
| ZINC75582911 | -34.3231 |
| ZINC75587803 | -44.7959 |
| ZINC75588774 | -35.8089 |
| ZINC75589441 | -36.875  |
| ZINC75594542 | -40.5996 |
| ZINC75594542 | -41.8612 |
| ZINC75596959 | -43.9901 |
| ZINC75597671 | -43.5655 |
| ZINC75597671 | -46.5144 |
| ZINC75605706 | -39.1882 |
| ZINC75607393 | -50.8245 |
| ZINC75607627 | -43.3501 |
| ZINC75613796 | -34.0024 |
| ZINC75614274 | -38.3073 |
| ZINC75616305 | -44.079  |
| ZINC75616305 | -50.7002 |
| ZINC75624624 | -35.9208 |
| ZINC75624624 | -36.916  |
| ZINC75630366 | -40.5949 |
| ZINC75630831 | -35.0391 |
| ZINC75631493 | -34.9863 |
| ZINC75631493 | -39.2607 |
| ZINC75631891 | -37.8566 |
| ZINC75635487 | -33.3507 |
| ZINC75636997 | -24.9587 |
| ZINC75638144 | -22.9149 |
| ZINC75638793 | -37.4699 |

|              |          |
|--------------|----------|
| ZINC75642797 | -36.5186 |
| ZINC75643156 | -34.4527 |
| ZINC75643156 | -39.584  |
| ZINC75643746 | -26.7975 |
| ZINC75645089 | -42.6134 |
| ZINC75645479 | -39.2482 |
| ZINC75645479 | -40.5853 |
| ZINC75645849 | -35.799  |
| ZINC75645849 | -44.6188 |
| ZINC75646126 | -41.5628 |
| ZINC75650946 | -34.7197 |
| ZINC75651798 | -45.8529 |
| ZINC75653582 | -37.9356 |
| ZINC75668641 | -36.3523 |
| ZINC75668884 | -38.5291 |
| ZINC75675063 | -48.4183 |
| ZINC75675158 | -41.1466 |
| ZINC75675239 | -44.0354 |
| ZINC75675242 | -41.5208 |
| ZINC75675277 | -39.0245 |
| ZINC75675277 | -40.5779 |
| ZINC75675659 | -40.4878 |
| ZINC75678778 | -47.0989 |
| ZINC75682995 | -24.7985 |
| ZINC75682995 | -28.7628 |
| ZINC75697850 | -34.1674 |
| ZINC75699111 | -35.5204 |
| ZINC75700567 | -40.0474 |
| ZINC75712627 | -37.9236 |
| ZINC75714528 | -27.1237 |
| ZINC75714528 | -33.1599 |
| ZINC75714597 | -35.3198 |
| ZINC75714597 | -36.6409 |
| ZINC75715275 | -39.9481 |
| ZINC75715441 | -34.9575 |
| ZINC75716619 | -45.7095 |
| ZINC75718604 | -32.6578 |
| ZINC75719675 | -39.2519 |
| ZINC75721673 | -32.4795 |
| ZINC75721838 | -43.7428 |
| ZINC75722312 | -30.8481 |
| ZINC75741274 | -42.4129 |
| ZINC75745265 | -35.3292 |
| ZINC75747094 | -32.9584 |

|              |          |
|--------------|----------|
| ZINC75747828 | -37.3978 |
| ZINC75750362 | -36.5806 |
| ZINC75750362 | -42.1644 |
| ZINC75750713 | -38.1697 |
| ZINC75750713 | -38.444  |
| ZINC75750717 | -27.9473 |
| ZINC75750717 | -28.7077 |
| ZINC75751644 | -32.2406 |
| ZINC75751644 | -35.413  |
| ZINC75752432 | -24.598  |
| ZINC75755627 | -39.5471 |
| ZINC75755627 | -40.9601 |
| ZINC75763622 | -44.8454 |
| ZINC75765595 | -34.564  |
| ZINC75765744 | -36.7724 |
| ZINC75767408 | -39.3348 |
| ZINC75767408 | -40.4034 |
| ZINC75768089 | -30.4013 |
| ZINC75772802 | -34.7258 |
| ZINC75776348 | -34.7303 |
| ZINC75799425 | -49.6592 |
| ZINC75799791 | -47.7508 |
| ZINC75800277 | -34.8251 |
| ZINC75811193 | -40.3103 |
| ZINC75821186 | -45.4384 |
| ZINC75827274 | -48.2073 |
| ZINC75831215 | -25.874  |
| ZINC75833137 | -42.5272 |
| ZINC75836779 | -32.328  |
| ZINC75863745 | -32.7282 |
| ZINC75868027 | -36.2424 |
| ZINC75873565 | -42.5035 |
| ZINC75876041 | -32.7231 |
| ZINC75876041 | -36.7544 |
| ZINC75884394 | -37.3336 |
| ZINC75889688 | -47.1935 |
| ZINC75893418 | -34.4829 |
| ZINC75894785 | -32.116  |
| ZINC75894785 | -37.4662 |
| ZINC75896128 | -32.7979 |
| ZINC75897781 | -38.2579 |
| ZINC75897781 | -38.9566 |
| ZINC75922954 | -30.4779 |
| ZINC75923684 | -35.7141 |

|              |          |
|--------------|----------|
| ZINC75923800 | -28.7083 |
| ZINC75923850 | -40.4628 |
| ZINC75923850 | -45.3704 |
| ZINC75924938 | -41.6543 |
| ZINC75935250 | -38.2644 |
| ZINC75936025 | -41.1045 |
| ZINC75961559 | -46.7341 |
| ZINC75966158 | -42.4798 |
| ZINC75984203 | -37.5336 |
| ZINC75988508 | -43.8904 |
| ZINC75989220 | -34.7492 |
| ZINC76002936 | -35.0692 |
| ZINC76002936 | -37.7892 |
| ZINC76012454 | -39.5318 |
| ZINC76021417 | -39.9904 |
| ZINC76035536 | -44.5881 |
| ZINC76036538 | -35.2454 |
| ZINC76051152 | -35.5229 |
| ZINC76051152 | -38.1622 |
| ZINC76058819 | -33.398  |
| ZINC76059009 | -28.7479 |
| ZINC76059009 | -32.1721 |
| ZINC76060083 | -48.3387 |
| ZINC76071765 | -35.6775 |
| ZINC76071765 | -35.9807 |
| ZINC76072873 | -36.3944 |
| ZINC76072873 | -38.5116 |
| ZINC76076361 | -41.5134 |
| ZINC76076505 | -39.7443 |
| ZINC76076505 | -47.9006 |
| ZINC76077304 | -38.0634 |
| ZINC76077304 | -43.272  |
| ZINC76081938 | -40.6339 |
| ZINC76093323 | -40.8741 |
| ZINC76103840 | -42.7999 |
| ZINC76107167 | -41.1961 |
| ZINC76108030 | -35.9993 |
| ZINC76118467 | -36.4324 |
| ZINC76119069 | -47.0146 |
| ZINC76119167 | -33.6949 |
| ZINC76119506 | -36.9459 |
| ZINC76120859 | -34.3493 |
| ZINC76124844 | -39.4408 |
| ZINC76128608 | -37.9464 |

|              |          |
|--------------|----------|
| ZINC76131090 | -50.4893 |
| ZINC76137930 | -42.3015 |
| ZINC76140896 | -37.1112 |
| ZINC76141197 | -39.7235 |
| ZINC76144017 | -39.5925 |
| ZINC76144017 | -39.9045 |
| ZINC76145119 | -38.5791 |
| ZINC76148178 | -47.1083 |
| ZINC76149199 | -33.234  |
| ZINC76149381 | -40.8799 |
| ZINC76149980 | -39.0198 |
| ZINC76150302 | -36.4092 |
| ZINC76152562 | -32.1    |
| ZINC76156577 | -43.7757 |
| ZINC76156577 | -45.6423 |
| ZINC76159210 | -39.3153 |
| ZINC76162637 | -43.2438 |
| ZINC76162637 | -44.96   |
| ZINC76174866 | -37.718  |
| ZINC76183335 | -40.5222 |
| ZINC76184391 | -36.8427 |
| ZINC76184391 | -39.1852 |
| ZINC76184540 | -35.9599 |
| ZINC76184540 | -46.2278 |
| ZINC76184618 | -30.0651 |
| ZINC76200215 | -39.8696 |
| ZINC76206029 | -45.834  |
| ZINC76213518 | -40.691  |
| ZINC76215897 | -46.006  |
| ZINC76216063 | -38.9506 |
| ZINC76221836 | -34.6806 |
| ZINC76227061 | -43.2201 |
| ZINC76227439 | -42.4537 |
| ZINC76227439 | -51.1811 |
| ZINC76227767 | -45.6374 |
| ZINC76247586 | -36.3903 |
| ZINC76249721 | -40.5892 |
| ZINC76264755 | -36.0177 |
| ZINC76265029 | -39.4956 |
| ZINC76292583 | -33.434  |
| ZINC76292583 | -34.3119 |
| ZINC76292971 | -35.9579 |
| ZINC76299700 | -34.8238 |
| ZINC76299700 | -35.7611 |



|              |          |
|--------------|----------|
| ZINC76306211 | -41.0031 |
| ZINC76309136 | -37.513  |
| ZINC76309136 | -40.8363 |
| ZINC76309227 | -37.9076 |
| ZINC76309659 | -29.2023 |
| ZINC76315784 | -43.731  |
| ZINC76331053 | -33.524  |
| ZINC76331053 | -44.4364 |
| ZINC76331364 | -38.7787 |
| ZINC76331364 | -44.9447 |
| ZINC76335123 | -39.7315 |
| ZINC76337432 | -38.0141 |
| ZINC76342683 | -45.4983 |
| ZINC76342683 | -45.5338 |
| ZINC76343407 | -32.7667 |
| ZINC76343407 | -36.5473 |
| ZINC76346277 | -32.0406 |
| ZINC76349297 | -39.738  |
| ZINC76352063 | -47.3866 |
| ZINC76352169 | -38.8138 |
| ZINC76354782 | -38.6278 |
| ZINC76357366 | -45.9557 |
| ZINC76357370 | -49.014  |
| ZINC76357806 | -30.5984 |
| ZINC76364470 | -36.1871 |
| ZINC76365923 | -37.7865 |
| ZINC76382337 | -40.0605 |
| ZINC76384043 | -33.5291 |
| ZINC76386426 | -37.1464 |
| ZINC76389503 | -31.2684 |
| ZINC76392288 | -46.55   |
| ZINC76395517 | -34.9625 |
| ZINC76395823 | -34.7221 |
| ZINC76397500 | -45.1538 |
| ZINC76400987 | -37.4492 |
| ZINC76401559 | -35.1337 |
| ZINC76403387 | -35.9723 |
| ZINC76410845 | -35.9048 |
| ZINC76411968 | -35.1915 |
| ZINC76414236 | -41.8268 |
| ZINC76416804 | -38.336  |
| ZINC76416804 | -42.6019 |
| ZINC76423159 | -47.8913 |
| ZINC76423159 | -57.0451 |

|              |          |
|--------------|----------|
| ZINC76423175 | -44.4716 |
| ZINC76427617 | -39.738  |
| ZINC76430627 | -45.5389 |
| ZINC76453315 | -28.793  |
| ZINC76453482 | -28.1398 |
| ZINC76453482 | -35.9349 |
| ZINC76454938 | -48.0449 |
| ZINC76455239 | -24.2886 |
| ZINC76457168 | -45.7074 |
| ZINC76460042 | -38.6781 |
| ZINC76460510 | -37.4798 |
| ZINC76461486 | -45.721  |
| ZINC76461642 | -41.6017 |
| ZINC76463529 | -46.575  |
| ZINC76466763 | -39.9202 |
| ZINC76467156 | -47.8184 |
| ZINC76472339 | -42.6855 |
| ZINC76479668 | -40.8828 |
| ZINC76479712 | -28.3614 |
| ZINC76481505 | -41.8686 |
| ZINC76482459 | -33.0514 |
| ZINC76486382 | -41.9105 |
| ZINC76486573 | -33.1725 |
| ZINC76493315 | -37.7858 |
| ZINC76500143 | -35.7563 |
| ZINC76508845 | -32.4456 |
| ZINC76510167 | -39.7922 |
| ZINC76510546 | -42.5284 |
| ZINC76510774 | -38.1094 |
| ZINC76514323 | -48.7372 |
| ZINC76515265 | -37.6501 |
| ZINC76531235 | -36.192  |
| ZINC76531669 | -42.5718 |
| ZINC76546423 | -36.6856 |
| ZINC76546736 | -45.1423 |
| ZINC76546785 | -29.4399 |
| ZINC76550461 | -37.4696 |
| ZINC76558979 | -48.4069 |
| ZINC76559916 | -35.0288 |
| ZINC76561646 | -39.8041 |
| ZINC76577531 | -42.9853 |
| ZINC76587181 | -40.0169 |
| ZINC76588282 | -47.4099 |
| ZINC76592764 | -33.434  |

|              |          |
|--------------|----------|
| ZINC76592764 | -33.4531 |
| ZINC76593139 | -39.5852 |
| ZINC76595239 | -43.9554 |
| ZINC76595239 | -46.3581 |
| ZINC76602277 | -32.7816 |
| ZINC76603756 | -41.9417 |
| ZINC76603756 | -46.7027 |
| ZINC76607927 | -42.4373 |
| ZINC76610782 | -35.2388 |
| ZINC76613088 | -39.1729 |
| ZINC76615857 | -38.1262 |
| ZINC76619882 | -48.3863 |
| ZINC76626311 | -43.3878 |
| ZINC76629468 | -25.8912 |
| ZINC76629468 | -32.6333 |
| ZINC76630663 | -45.7615 |
| ZINC76636632 | -42.7094 |
| ZINC76642022 | -44.3533 |
| ZINC76647570 | -41.9409 |
| ZINC76648788 | -36.2954 |
| ZINC76651492 | -39.6186 |
| ZINC76652886 | -22.6106 |
| ZINC76657474 | -40.5396 |
| ZINC76664334 | -34.8936 |
| ZINC76664334 | -42.7535 |
| ZINC76666781 | -45.0333 |
| ZINC76693317 | -37.0107 |
| ZINC76700068 | -40.8814 |
| ZINC76700194 | -34.7519 |
| ZINC76707825 | -38.2697 |
| ZINC76707825 | -43.885  |
| ZINC76708010 | -37.0162 |
| ZINC76708010 | -41.1998 |
| ZINC76708717 | -35.972  |
| ZINC76708717 | -37.1373 |
| ZINC76710092 | -44.9708 |
| ZINC76710360 | -41.7878 |
| ZINC76710391 | -38.9105 |
| ZINC76714628 | -40.1845 |
| ZINC76720894 | -36.3624 |
| ZINC76721925 | -36.2117 |
| ZINC76733727 | -51.473  |
| ZINC76734596 | -37.8286 |
| ZINC76734596 | -38.3375 |

|              |          |
|--------------|----------|
| ZINC76736336 | -37.1185 |
| ZINC76736828 | -35.5232 |
| ZINC76740261 | -39.7314 |
| ZINC76745774 | -42.0293 |
| ZINC76745774 | -49.5141 |
| ZINC76752458 | -34.114  |
| ZINC76756069 | -48.9758 |
| ZINC76756541 | -35.0867 |
| ZINC76757952 | -39.3798 |
| ZINC76757967 | -41.4121 |
| ZINC76758042 | -31.7394 |
| ZINC76761609 | -47.6721 |
| ZINC76761609 | -52.8202 |
| ZINC76765037 | -40.6596 |
| ZINC76766759 | -38.1821 |
| ZINC76768827 | -38.7734 |
| ZINC76773458 | -41.6207 |
| ZINC76774692 | -47.6728 |
| ZINC76780100 | -40.5401 |
| ZINC76799268 | -37.0006 |
| ZINC76803870 | -43.2569 |
| ZINC76803870 | -45.4    |
| ZINC76804365 | -48.2807 |
| ZINC76804666 | -38.2506 |
| ZINC76810488 | -32.4685 |
| ZINC76810488 | -45.4217 |
| ZINC76815635 | -36.9425 |
| ZINC76817035 | -22.1784 |
| ZINC76817035 | -40.1119 |
| ZINC76817658 | -34.6055 |
| ZINC76819065 | -33.8374 |
| ZINC76819065 | -39.9244 |
| ZINC76820616 | -40.0748 |
| ZINC76832672 | -27.1195 |
| ZINC76843605 | -45.7947 |
| ZINC76844795 | -34.283  |
| ZINC76845415 | -33.9573 |
| ZINC76850180 | -46.5583 |
| ZINC76852611 | -33.6484 |
| ZINC76853793 | -30.1848 |
| ZINC76860310 | -48.8894 |
| ZINC76864624 | -47.5905 |
| ZINC76865154 | -44.2463 |
| ZINC76865856 | -37.706  |

|              |          |
|--------------|----------|
| ZINC76865856 | -38.673  |
| ZINC76866405 | -38.2132 |
| ZINC76866405 | -39.2617 |
| ZINC76866407 | -39.2762 |
| ZINC76866407 | -39.3568 |
| ZINC76866501 | -36.8557 |
| ZINC76866501 | -38.6457 |
| ZINC76867342 | -32.3694 |
| ZINC76871766 | -49.5129 |
| ZINC76872325 | -37.4675 |
| ZINC76874986 | -49.4158 |
| ZINC76880161 | -38.8043 |
| ZINC76880161 | -41.1422 |
| ZINC76880258 | -37.6523 |
| ZINC76880258 | -37.757  |
| ZINC76880865 | -40.6451 |
| ZINC76896009 | -44.9703 |
| ZINC76896009 | -46.9298 |
| ZINC76910038 | -37.9579 |
| ZINC76910923 | -32.3089 |
| ZINC76911259 | -38.4081 |
| ZINC76923710 | -37.516  |
| ZINC76935088 | -41.8408 |
| ZINC76938618 | -39.7989 |
| ZINC76945773 | -19.0473 |
| ZINC76946983 | -42.5198 |
| ZINC76948193 | -40.8912 |
| ZINC76962009 | -37.235  |
| ZINC76963359 | -47.1034 |
| ZINC76987850 | -37.658  |
| ZINC76991382 | -38.2487 |
| ZINC76994266 | -37.42   |
| ZINC76994266 | -38.3899 |
| ZINC76997244 | -46.9382 |
| ZINC77002531 | -35.79   |
| ZINC77012685 | -31.1424 |
| ZINC77013038 | -36.6956 |
| ZINC77014754 | -42.1727 |
| ZINC77022583 | -45.6401 |
| ZINC77023611 | -34.6425 |
| ZINC77038315 | -41.2427 |
| ZINC77042328 | -45.7542 |
| ZINC77042328 | -48.5977 |
| ZINC77103942 | -41.1302 |

|              |          |
|--------------|----------|
| ZINC77104669 | -38.4476 |
| ZINC77110651 | -41.2752 |
| ZINC77111023 | -39.6085 |
| ZINC77111325 | -42.4023 |
| ZINC77111690 | -33.3778 |
| ZINC77113312 | -39.3074 |
| ZINC77117163 | -34.5158 |
| ZINC77117701 | -36.5413 |
| ZINC77117755 | -42.7967 |
| ZINC77117955 | -39.0709 |
| ZINC77118044 | -43.0702 |
| ZINC77121399 | -32.9959 |
| ZINC77121656 | -41.5761 |
| ZINC77131474 | -46.9665 |
| ZINC77136364 | -46.7908 |
| ZINC77136364 | -47.8653 |
| ZINC77141611 | -45.6878 |
| ZINC77142814 | -41.4223 |
| ZINC77148050 | -45.3221 |
| ZINC77149977 | -35.6461 |
| ZINC77156725 | -41.6389 |
| ZINC77159649 | -39.7083 |
| ZINC77159997 | -42.6514 |
| ZINC77161867 | -42.2397 |
| ZINC77164803 | -32.4566 |
| ZINC77165981 | -47.1857 |
| ZINC77167594 | -35.2259 |
| ZINC77175222 | -46.929  |
| ZINC77176665 | -38.4996 |
| ZINC77177675 | -34.7682 |
| ZINC77182015 | -43.2886 |
| ZINC77192095 | -36.5544 |
| ZINC77192471 | -45.059  |
| ZINC77192655 | -32.0092 |
| ZINC77192655 | -42.5089 |
| ZINC77192660 | -37.6595 |
| ZINC77197729 | -49.5051 |
| ZINC77204124 | -49.4552 |
| ZINC77208166 | -40.714  |
| ZINC77208689 | -39.2804 |
| ZINC77209499 | -37.7446 |
| ZINC77209499 | -38.5748 |
| ZINC77210568 | -42.0127 |
| ZINC77215978 | -42.9649 |

|              |          |
|--------------|----------|
| ZINC77218983 | -43.9065 |
| ZINC77218983 | -48.3784 |
| ZINC77220676 | -45.617  |
| ZINC77223974 | -43.5394 |
| ZINC77225471 | -36.05   |
| ZINC77225471 | -37.3247 |
| ZINC77235900 | -43.035  |
| ZINC77237068 | -38.2094 |
| ZINC77237068 | -42.0031 |
| ZINC77237068 | -42.7153 |
| ZINC77237572 | -38.002  |
| ZINC77238175 | -38.3709 |
| ZINC77238689 | -41.4401 |
| ZINC77241540 | -36.8077 |
| ZINC77242165 | -34.9032 |
| ZINC77247700 | -38.4846 |
| ZINC77247706 | -36.1477 |
| ZINC77249386 | -36.5512 |
| ZINC77265636 | -42.4086 |
| ZINC77265731 | -44.4    |
| ZINC77266690 | -37.025  |
| ZINC77266690 | -47.582  |
| ZINC77267402 | -36.2542 |
| ZINC77267613 | -48.3649 |
| ZINC77268229 | -43.1159 |
| ZINC77269172 | -40.7289 |
| ZINC77269172 | -43.1243 |
| ZINC77272072 | -43.5569 |
| ZINC77273642 | -43.3537 |
| ZINC77274956 | -38.3143 |
| ZINC77275646 | -40.9645 |
| ZINC77277682 | -37.3158 |
| ZINC77287483 | -44.4005 |
| ZINC77288120 | -36.4488 |
| ZINC77288120 | -38.6802 |
| ZINC77292238 | -46.8011 |
| ZINC77301821 | -36.4656 |
| ZINC77306834 | -36.0526 |
| ZINC77313686 | -40.2949 |
| ZINC77316385 | -34.6684 |
| ZINC77316385 | -36.383  |
| ZINC77316707 | -35.5054 |
| ZINC77316944 | -33.5096 |
| ZINC77316944 | -35.0979 |

|              |          |
|--------------|----------|
| ZINC77322844 | -42.5162 |
| ZINC77322844 | -43.5528 |
| ZINC77323671 | -39.5372 |
| ZINC77329157 | -39.2115 |
| ZINC77329157 | -42.6629 |
| ZINC77330881 | -36.4183 |
| ZINC77330881 | -38.1934 |
| ZINC77334546 | -49.1702 |
| ZINC77340994 | -28.4839 |
| ZINC77342263 | -42.0201 |
| ZINC77342640 | -29.3872 |
| ZINC77342640 | -32.066  |
| ZINC77342801 | -34.9119 |
| ZINC77342801 | -43.134  |
| ZINC77343755 | -37.7746 |
| ZINC77343755 | -42.1001 |
| ZINC77344371 | -38.9435 |
| ZINC77347372 | -43.5787 |
| ZINC77352461 | -40.1858 |
| ZINC77352583 | -37.0149 |
| ZINC77352690 | -33.2579 |
| ZINC77353962 | -38.5158 |
| ZINC77359994 | -25.9145 |
| ZINC77359994 | -33.5728 |
| ZINC77361410 | -36.0846 |
| ZINC77361410 | -39.8489 |
| ZINC77369987 | -30.9593 |
| ZINC77369987 | -39.4521 |
| ZINC77370121 | -28.7536 |
| ZINC77370121 | -38.2093 |
| ZINC77375342 | -31.7301 |
| ZINC77375342 | -46.5774 |
| ZINC77402515 | -40.1036 |
| ZINC77407018 | -35.305  |
| ZINC77407561 | -46.9668 |
| ZINC77407780 | -35.6304 |
| ZINC77412303 | -39.632  |
| ZINC77415356 | -44.0594 |
| ZINC77422747 | -50.6124 |
| ZINC77422747 | -50.7982 |
| ZINC77425383 | -39.5518 |
| ZINC77425389 | -38.3915 |
| ZINC77430160 | -42.3891 |
| ZINC77432435 | -28.1584 |



|              |          |
|--------------|----------|
| ZINC77444086 | -36.4823 |
| ZINC77450453 | -37.421  |
| ZINC77454869 | -37.9276 |
| ZINC77454869 | -40.8187 |
| ZINC77455321 | -41.0917 |
| ZINC77455723 | -41.3235 |
| ZINC77457238 | -46.691  |
| ZINC77458012 | -28.7297 |
| ZINC77459228 | -45.0514 |
| ZINC77459452 | -46.0364 |
| ZINC77461920 | -42.0529 |
| ZINC77466645 | -33.3042 |
| ZINC77466645 | -35.9776 |
| ZINC77467493 | -41.8283 |
| ZINC77468144 | -39.741  |
| ZINC77468144 | -41.113  |
| ZINC77469868 | -24.6992 |
| ZINC77469911 | -31.9052 |
| ZINC77469911 | -35.8944 |
| ZINC77470303 | -39.697  |
| ZINC77470303 | -40.0376 |
| ZINC77472438 | -32.6267 |
| ZINC77477412 | -34.2953 |
| ZINC77478304 | -52.2872 |
| ZINC77480787 | -40.5576 |
| ZINC77485518 | -37.0621 |
| ZINC77485518 | -39.4832 |
| ZINC77485817 | -33.1934 |
| ZINC77486801 | -35.5925 |
| ZINC77487229 | -30.6469 |
| ZINC77491353 | -38.7215 |
| ZINC77491743 | -36.9622 |
| ZINC77492262 | -46.6861 |
| ZINC77496646 | -40.5788 |
| ZINC77506414 | -43.6801 |
| ZINC77506715 | -33.8665 |
| ZINC77508086 | -41.7596 |
| ZINC77508761 | -42.5658 |
| ZINC77508891 | -33.7118 |
| ZINC77514610 | -43.1089 |
| ZINC77525838 | -38.0284 |
| ZINC77525838 | -39.1112 |
| ZINC77527657 | -40.8783 |
| ZINC77530097 | -43.1082 |

|              |          |
|--------------|----------|
| ZINC77531221 | -44.1497 |
| ZINC77536826 | -35.9569 |
| ZINC77537307 | -40.6167 |
| ZINC77537496 | -32.1497 |
| ZINC77537756 | -43.0907 |
| ZINC77538419 | -33.9292 |
| ZINC77538434 | -45.3214 |
| ZINC77542188 | -41.1354 |
| ZINC77542854 | -41.6766 |
| ZINC77543333 | -40.1958 |
| ZINC77545458 | -36.1277 |
| ZINC77551778 | -35.049  |
| ZINC77553473 | -34.5568 |
| ZINC77557041 | -28.7102 |
| ZINC77557041 | -34.9999 |
| ZINC77569470 | -40.7766 |
| ZINC77571623 | -53.8699 |
| ZINC77573142 | -39.985  |
| ZINC77573142 | -45.3274 |
| ZINC77574915 | -33.6965 |
| ZINC77586868 | -35.4403 |
| ZINC77588942 | -34.9017 |
| ZINC77588942 | -40.3076 |
| ZINC77592347 | -37.6961 |
| ZINC77603001 | -43.6369 |
| ZINC77611073 | -40.0404 |
| ZINC77611146 | -42.7389 |
| ZINC77612327 | -36.69   |
| ZINC77614749 | -39.0616 |
| ZINC77616828 | -43.8071 |
| ZINC77617364 | -47.6991 |
| ZINC77620534 | -40.8365 |
| ZINC77630062 | -42.8317 |
| ZINC77631031 | -45.5469 |
| ZINC77634162 | -40.6631 |
| ZINC77645717 | -40.6657 |
| ZINC77646873 | -32.5757 |
| ZINC77652072 | -34.4473 |
| ZINC77653598 | -38.4006 |
| ZINC77654248 | -42.7744 |
| ZINC77654559 | -38.5792 |
| ZINC77657933 | -48.9794 |
| ZINC77661289 | -45.2811 |
| ZINC77665172 | -45.3277 |

|              |          |
|--------------|----------|
| ZINC77665423 | -44.5302 |
| ZINC77670262 | -38.39   |
| ZINC77684692 | -37.6098 |
| ZINC77687562 | -42.9372 |
| ZINC77688957 | -43.4774 |
| ZINC77689437 | -40.4173 |
| ZINC77689776 | -37.3465 |
| ZINC77690150 | -43.6696 |
| ZINC77690169 | -47.5297 |
| ZINC77695303 | -40.7477 |
| ZINC77696146 | -36.2619 |
| ZINC77696195 | -38.4766 |
| ZINC77697903 | -44.0519 |
| ZINC77701723 | -37.4669 |
| ZINC77718924 | -47.795  |
| ZINC77718951 | -41.0799 |
| ZINC77719031 | -36.7562 |
| ZINC77721175 | -37.5619 |
| ZINC77721175 | -45.4945 |
| ZINC77727234 | -47.2793 |
| ZINC77732535 | -40.9681 |
| ZINC77732535 | -46.1022 |
| ZINC77732957 | -39.8001 |
| ZINC77739315 | -37.2916 |
| ZINC77741155 | -36.7197 |
| ZINC77741966 | -39.7317 |
| ZINC77745197 | -45.3228 |
| ZINC77752924 | -40.4121 |
| ZINC77766026 | -46.8125 |
| ZINC77767044 | -47.8905 |
| ZINC77771325 | -46.0265 |
| ZINC77781336 | -45.5518 |
| ZINC77784887 | -31.7901 |
| ZINC77790363 | -41.9434 |
| ZINC77796458 | -37.1239 |
| ZINC77802320 | -45.5059 |
| ZINC77811793 | -38.4708 |
| ZINC77811934 | -38.3351 |
| ZINC77816697 | -35.255  |
| ZINC77817501 | -32.534  |
| ZINC77865607 | -41.5846 |
| ZINC77868836 | -47.9448 |
| ZINC77872058 | -45.1535 |
| ZINC77873931 | -38.8941 |

|              |          |
|--------------|----------|
| ZINC77880271 | -35.1726 |
| ZINC77886986 | -36.1421 |
| ZINC77887736 | -39.5546 |
| ZINC77891866 | -45.8748 |
| ZINC77892977 | -30.947  |
| ZINC77894636 | -36.9387 |
| ZINC77897414 | -41.8868 |
| ZINC77897506 | -37.3241 |
| ZINC77901410 | -36.3846 |
| ZINC77903728 | -31.466  |
| ZINC77909632 | -36.5337 |
| ZINC77917319 | -48.5082 |
| ZINC77917338 | -47.5892 |
| ZINC77927417 | -37.4245 |
| ZINC77928955 | -36.3769 |
| ZINC77928955 | -41.8894 |
| ZINC77936235 | -42.4687 |
| ZINC77941128 | -40.1385 |
| ZINC77941128 | -42.9986 |
| ZINC77942274 | -42.3888 |
| ZINC77947720 | -39.4299 |
| ZINC77947745 | -51.5345 |
| ZINC77948106 | -52.3911 |
| ZINC77948235 | -44.7839 |
| ZINC77955905 | -28.3338 |
| ZINC77956133 | -39.1326 |
| ZINC77959568 | -45.026  |
| ZINC77960086 | -41.9322 |
| ZINC77962539 | -40.2815 |
| ZINC77962539 | -49.5113 |
| ZINC77962683 | -41.9484 |
| ZINC77968772 | -47.9278 |
| ZINC77973835 | -35.0601 |
| ZINC77978155 | -48.4729 |
| ZINC77983151 | -34.8498 |
| ZINC77983151 | -36.8933 |
| ZINC77984561 | -42.5073 |
| ZINC77984561 | -44.2625 |
| ZINC77984858 | -37.9104 |
| ZINC77984858 | -40.6403 |
| ZINC77985821 | -34.6126 |
| ZINC77986493 | -33.7181 |
| ZINC77991234 | -41.2297 |
| ZINC77995049 | -36.2747 |

|              |          |
|--------------|----------|
| ZINC77995575 | -38.839  |
| ZINC77999845 | -32.2922 |
| ZINC78000806 | -43.0706 |
| ZINC78003183 | -35.9048 |
| ZINC78006586 | -39.8931 |
| ZINC78021715 | -35.3805 |
| ZINC78032684 | -47.4629 |
| ZINC78038080 | -36.9389 |
| ZINC78040916 | -45.784  |
| ZINC78040940 | -37.7517 |
| ZINC78046616 | -34.9143 |
| ZINC78046744 | -27.0587 |
| ZINC78046744 | -29.9381 |
| ZINC78048755 | -47.7885 |
| ZINC78052301 | -37.508  |
| ZINC78052706 | -38.9279 |
| ZINC78055172 | -40.5786 |
| ZINC78064128 | -32.9354 |
| ZINC78069450 | -34.5197 |
| ZINC78071634 | -39.9997 |
| ZINC78077373 | -35.1472 |
| ZINC78079354 | -39.5828 |
| ZINC78082542 | -46.5342 |
| ZINC78084817 | -33.6731 |
| ZINC78086402 | -42.4746 |
| ZINC78091561 | -40.2295 |
| ZINC78093664 | -45.4101 |
| ZINC78093848 | -32.8854 |
| ZINC78102031 | -33.6982 |
| ZINC78109697 | -38.1561 |
| ZINC78148897 | -43.1563 |
| ZINC78149024 | -38.4045 |
| ZINC78149388 | -43.6577 |
| ZINC78150606 | -36.6411 |
| ZINC78150606 | -40.1044 |
| ZINC78155438 | -35.1285 |
| ZINC78155478 | -39.1069 |
| ZINC78169219 | -35.21   |
| ZINC78177497 | -34.581  |
| ZINC78177561 | -32.4548 |
| ZINC78181722 | -32.9136 |
| ZINC78181920 | -32.9324 |
| ZINC78187734 | -44.9582 |
| ZINC78188118 | -44.0252 |

|              |          |
|--------------|----------|
| ZINC78190618 | -37.0936 |
| ZINC78204641 | -39.5715 |
| ZINC78206947 | -42.4897 |
| ZINC78210483 | -44.2763 |
| ZINC78224662 | -37.7279 |
| ZINC78229451 | -40.9379 |
| ZINC78231716 | -37.7377 |
| ZINC78244454 | -32.9695 |
| ZINC78248806 | -41.1773 |
| ZINC78248852 | -34.1475 |
| ZINC78248858 | -43.2129 |
| ZINC78253416 | -34.9686 |
| ZINC78254593 | -42.568  |
| ZINC78255737 | -30.6633 |
| ZINC78258627 | -40.22   |
| ZINC78259199 | -36.4025 |
| ZINC78261178 | -37.2174 |
| ZINC78262672 | -36.5942 |
| ZINC78263945 | -40.0374 |
| ZINC78264225 | -34.4644 |
| ZINC78266460 | -39.8199 |
| ZINC78266684 | -44.3549 |
| ZINC78267063 | -35.3577 |
| ZINC78267063 | -37.09   |
| ZINC78267303 | -45.8101 |
| ZINC78267303 | -49.3554 |
| ZINC78288263 | -33.713  |
| ZINC78288263 | -35.1367 |
| ZINC78289685 | -29.7608 |
| ZINC78289699 | -40.9831 |
| ZINC78289910 | -33.0833 |
| ZINC78290488 | -34.9624 |
| ZINC78290979 | -43.7517 |
| ZINC78293983 | -42.4924 |
| ZINC78294420 | -37.8463 |
| ZINC78294711 | -38.7787 |
| ZINC78294716 | -30.8344 |
| ZINC78294716 | -34.9328 |
| ZINC78295233 | -26.8668 |
| ZINC78296216 | -38.8303 |
| ZINC78298132 | -38.4297 |
| ZINC78299173 | -39.0684 |
| ZINC78299866 | -32.4513 |
| ZINC78300528 | -40.0028 |

|              |          |
|--------------|----------|
| ZINC78300528 | -41.7429 |
| ZINC78300912 | -41.5087 |
| ZINC78301293 | -31.5143 |
| ZINC78302440 | -29.9809 |
| ZINC78302440 | -42.5524 |
| ZINC78307111 | -38.8437 |
| ZINC78308397 | -40.8474 |
| ZINC78308397 | -53.7203 |
| ZINC78308436 | -44.3818 |
| ZINC78308986 | -47.3825 |
| ZINC78315248 | -32.8565 |
| ZINC78315248 | -36.2689 |
| ZINC78319523 | -51.7988 |
| ZINC78322640 | -42.7694 |
| ZINC78325733 | -35.2547 |
| ZINC78328063 | -43.0578 |
| ZINC78330164 | -39.5575 |
| ZINC78330561 | -46.2284 |
| ZINC78331278 | -38.1182 |
| ZINC78336726 | -39.3123 |
| ZINC78337500 | -39.8217 |
| ZINC78337980 | -38.9647 |
| ZINC78337980 | -44.5701 |
| ZINC78340723 | -48.1972 |
| ZINC78340978 | -38.5161 |
| ZINC78341887 | -36.5155 |
| ZINC78341887 | -41.1264 |
| ZINC78342291 | -36.3196 |
| ZINC78345615 | -32.1747 |
| ZINC78348094 | -52.1286 |
| ZINC78348432 | -38.6514 |
| ZINC78348879 | -45.9913 |
| ZINC78351289 | -40.0808 |
| ZINC78354038 | -34.3172 |
| ZINC78354589 | -41.4441 |
| ZINC78355776 | -44.4593 |
| ZINC78358643 | -39.1228 |
| ZINC78360562 | -36.8482 |
| ZINC78362200 | -42.2697 |
| ZINC78362248 | -42.0144 |
| ZINC78362828 | -39.1396 |
| ZINC78362828 | -45.7031 |
| ZINC78363097 | -32.737  |
| ZINC78365644 | -36.2927 |

|              |          |
|--------------|----------|
| ZINC78368509 | -43.6459 |
| ZINC78372496 | -36.6436 |
| ZINC78376011 | -37.8868 |
| ZINC78376175 | -34.0417 |
| ZINC78376549 | -39.8012 |
| ZINC78378277 | -39.9322 |
| ZINC78381935 | -34.3346 |
| ZINC78381935 | -38.175  |
| ZINC78382480 | -33.4493 |
| ZINC78385045 | -37.8953 |
| ZINC78385776 | -38.3031 |
| ZINC78385776 | -39.7916 |
| ZINC78395987 | -45.1015 |
| ZINC78396073 | -35.1687 |
| ZINC78399713 | -34.9171 |
| ZINC78400379 | -41.73   |
| ZINC78403552 | -42.6139 |
| ZINC78404272 | -37.8835 |
| ZINC78404272 | -43.1155 |
| ZINC78404585 | -31.2039 |
| ZINC78404585 | -34.419  |
| ZINC78404874 | -40.5388 |
| ZINC78406697 | -44.2826 |
| ZINC78411021 | -36.8693 |
| ZINC78415676 | -46.5931 |
| ZINC78415694 | -37.58   |
| ZINC78416148 | -40.6724 |
| ZINC78418532 | -39.743  |
| ZINC78418657 | -45.2186 |
| ZINC78418657 | -47.2109 |
| ZINC78419924 | -35.0763 |
| ZINC78424218 | -42.7171 |
| ZINC78424218 | -44.8987 |
| ZINC78424657 | -39.997  |
| ZINC78428535 | -40.3616 |
| ZINC78431209 | -40.7979 |
| ZINC78431929 | -39.054  |
| ZINC78435883 | -36.6545 |
| ZINC78436475 | -36.6554 |
| ZINC78436475 | -38.3867 |
| ZINC78437054 | -39.906  |
| ZINC78438282 | -37.8596 |
| ZINC78442229 | -39.5168 |
| ZINC78449052 | -39.7608 |



|              |          |
|--------------|----------|
| ZINC78449052 | -46.2735 |
| ZINC78449327 | -33.9399 |
| ZINC78449327 | -34.6022 |
| ZINC78451832 | -33.3343 |
| ZINC78453405 | -37.9238 |
| ZINC78453848 | -52.0292 |
| ZINC78454980 | -46.2577 |
| ZINC78460840 | -40.5837 |
| ZINC78461109 | -38.2676 |
| ZINC78462703 | -46.4448 |
| ZINC78462768 | -34.543  |
| ZINC78463193 | -42.1575 |
| ZINC78464337 | -41.6258 |
| ZINC78468404 | -45.2558 |
| ZINC78469441 | -50.3592 |
| ZINC78474968 | -40.4515 |
| ZINC78477721 | -41.4298 |
| ZINC78479814 | -39.5938 |
| ZINC78479924 | -41.8818 |
| ZINC78481853 | -40.6265 |
| ZINC78488732 | -37.8929 |
| ZINC78488907 | -41.8228 |
| ZINC78489588 | -36.3962 |
| ZINC78493011 | -41.508  |
| ZINC78511383 | -37.498  |
| ZINC78512443 | -37.4154 |
| ZINC78513439 | -38.0436 |
| ZINC78514547 | -40.2926 |
| ZINC78514945 | -38.3538 |
| ZINC78514945 | -40.5899 |
| ZINC78515447 | -35.346  |
| ZINC78515447 | -43.2553 |
| ZINC78527736 | -37.9268 |
| ZINC78527736 | -42.0059 |
| ZINC78527978 | -40.58   |
| ZINC78527978 | -45.4267 |
| ZINC78530163 | -34.7151 |
| ZINC78531425 | -38.3385 |
| ZINC78535128 | -41.6201 |
| ZINC78535406 | -37.9304 |
| ZINC78535452 | -32.9029 |
| ZINC78535585 | -47.9438 |
| ZINC78535613 | -36.5656 |
| ZINC78540122 | -39.1941 |

|              |          |
|--------------|----------|
| ZINC78541197 | -39.1812 |
| ZINC78542664 | -43.4965 |
| ZINC78543615 | -42.5854 |
| ZINC78543667 | -38.4657 |
| ZINC78544448 | -42.6792 |
| ZINC78545137 | -46.5184 |
| ZINC78545579 | -37.1899 |
| ZINC78546281 | -34.808  |
| ZINC78556546 | -30.8184 |
| ZINC78562376 | -40.6176 |
| ZINC78563252 | -40.7758 |
| ZINC78567687 | -36.1505 |
| ZINC78568718 | -42.0367 |
| ZINC78570042 | -43.1945 |
| ZINC78572551 | -33.15   |
| ZINC78576632 | -39.8099 |
| ZINC78577993 | -37.828  |
| ZINC78583037 | -39.9844 |
| ZINC78584352 | -42.1555 |
| ZINC78586203 | -28.847  |
| ZINC78596537 | -30.6966 |
| ZINC78598966 | -32.0397 |
| ZINC78602833 | -29.155  |
| ZINC78608404 | -38.429  |
| ZINC78611087 | -34.2808 |
| ZINC78611087 | -41.4843 |
| ZINC78614447 | -43.9386 |
| ZINC78615866 | -33.8344 |
| ZINC78618154 | -39.1955 |
| ZINC78619325 | -38.7811 |
| ZINC78619325 | -44.1892 |
| ZINC78619780 | -37.3884 |
| ZINC78619780 | -37.9615 |
| ZINC78620283 | -37.71   |
| ZINC78620313 | -36.6815 |
| ZINC78624651 | -36.0457 |
| ZINC78624657 | -34.1489 |
| ZINC78627442 | -37.7449 |
| ZINC78632147 | -37.1289 |
| ZINC78638322 | -38.3119 |
| ZINC78645707 | -38.5491 |
| ZINC78645836 | -44.3224 |
| ZINC78647867 | -31.9272 |
| ZINC78647973 | -43.6448 |

|              |          |
|--------------|----------|
| ZINC78649133 | -35.042  |
| ZINC78649868 | -41.7329 |
| ZINC78649868 | -45.8042 |
| ZINC78650895 | -38.4418 |
| ZINC78656643 | -38.5369 |
| ZINC78659055 | -42.2108 |
| ZINC78660332 | -36.2869 |
| ZINC78665574 | -35.1805 |
| ZINC78665971 | -36.3306 |
| ZINC78665971 | -44.1847 |
| ZINC78666797 | -38.1139 |
| ZINC78666919 | -36.686  |
| ZINC78667692 | -32.5495 |
| ZINC78668089 | -35.491  |
| ZINC78669261 | -42.0282 |
| ZINC78671681 | -38.4226 |
| ZINC78672539 | -33.3459 |
| ZINC78672868 | -44.2416 |
| ZINC78673535 | -38.8789 |
| ZINC78673726 | -35.5014 |
| ZINC78680579 | -33.2364 |
| ZINC78692524 | -41.583  |
| ZINC78693769 | -31.6815 |
| ZINC78694328 | -44.1227 |
| ZINC78694870 | -43.7212 |
| ZINC78694891 | -36.474  |
| ZINC78697496 | -40.1961 |
| ZINC78701247 | -44.5945 |
| ZINC78701978 | -39.5658 |
| ZINC78702718 | -47.4907 |
| ZINC78702718 | -49.0741 |
| ZINC78705652 | -26.8868 |
| ZINC78709333 | -30.103  |
| ZINC78709414 | -42.029  |
| ZINC78709514 | -39.5445 |
| ZINC78709514 | -39.8798 |
| ZINC78710523 | -42.0613 |
| ZINC78712440 | -39.4017 |
| ZINC78712626 | -44.3501 |
| ZINC78713191 | -43.5876 |
| ZINC78715863 | -40.7179 |
| ZINC78716153 | -40.15   |
| ZINC78717114 | -41.3872 |
| ZINC78720097 | -40.9262 |

|              |          |
|--------------|----------|
| ZINC78721290 | -47.2943 |
| ZINC78723245 | -42.6931 |
| ZINC78725941 | -36.764  |
| ZINC78729386 | -38.5075 |
| ZINC78730551 | -29.8425 |
| ZINC78730551 | -34.5742 |
| ZINC78732273 | -31.1835 |
| ZINC78732531 | -34.8498 |
| ZINC78733071 | -38.6669 |
| ZINC78736656 | -38.2006 |
| ZINC78736656 | -44.1944 |
| ZINC78741572 | -41.8368 |
