# Supplementary material for: Cheminformatics Models for Inhibitors ofSchistosoma mansoniThioredoxin Glutathione Reductase
Source: Hindawi journal article supplement (doi:10.1155/2014/957107), 2014-01-01
Supplement: f1 [file 957107.f1.zip]

**Supplementary Table 2. Substructures having frequency greater than 0.1 percent in actives**

| Smiles                       | Matches in Actives (10735) | Matches in Inactives (331528) | Actives (without motif) | Inactives (without motif) | Chi-square | p-value | Frequency in Actives | Frequency in Inactives | Enrichment Factor |
|------------------------------|----------------------------|-------------------------------|-------------------------|---------------------------|------------|---------|----------------------|------------------------|-------------------|
| <chem>CCNc1ccccc1</chem>     | 2160                       | 84190                         | 8575                    | 247338                    | 153.290    | 0.00    | 0.201                | 0.254                  | 0.79              |
| <chem>CNCc1ccccc1</chem>     | 1894                       | 69382                         | 8841                    | 262146                    | 68.044     | 0.00    | 0.176                | 0.209                  | 0.84              |
| <chem>O=CNc1ccccc1</chem>    | 1883                       | 87065                         | 8852                    | 244463                    | 411.164    | 0.00    | 0.175                | 0.263                  | 0.67              |
| <chem>O=S(=O)c1ccccc1</chem> | 1281                       | 48198                         | 9454                    | 283330                    | 57.069     | 0.00    | 0.119                | 0.145                  | 0.82              |
| <chem>CN(C)c1ccccc1</chem>   | 1268                       | 37992                         | 9467                    | 293536                    | 1.270      | 0.26    | 0.118                | 0.115                  | 1.03              |
| <chem>CCc1ccccc1</chem>      | 1228                       | 29239                         | 9507                    | 302289                    | 88.004     | 0.00    | 0.114                | 0.088                  | 1.30              |
| <chem>COc1ccc(C)cc1</chem>   | 955                        | 37682                         | 9780                    | 293846                    | 63.349     | 0.00    | 0.089                | 0.114                  | 0.78              |
| <chem>Oc1ccccc1O</chem>      | 861                        | 30358                         | 9874                    | 301170                    | 16.202     | 0.00    | 0.080                | 0.092                  | 0.88              |
| <chem>NCCc1ccccc1</chem>     | 810                        | 28339                         | 9925                    | 303189                    | 13.415     | 0.00    | 0.075                | 0.085                  | 0.88              |
| <chem>CCOc1ccccc1</chem>     | 783                        | 38282                         | 9952                    | 293246                    | 186.041    | 0.00    | 0.073                | 0.115                  | 0.63              |
| <chem>COc1cccc(C)c1</chem>   | 727                        | 27612                         | 10008                   | 303916                    | 33.171     | 0.00    | 0.068                | 0.083                  | 0.81              |
| <chem>CC(=O)c1ccccc1</chem>  | 697                        | 10137                         | 10038                   | 321391                    | 400.301    | 0.00    | 0.065                | 0.031                  | 2.12              |
| <chem>NCNc1ccccc1</chem>     | 689                        | 15220                         | 10046                   | 316308                    | 78.346     | 0.00    | 0.064                | 0.046                  | 1.40              |
| <chem>O=CNc1ccco1</chem>     | 639                        | 3271                          | 10096                   | 328257                    | 2270.504   | 0.00    | 0.060                | 0.010                  | 6.03              |
| <chem>CCc1ccc(O)cc1</chem>   | 621                        | 15017                         | 10114                   | 316511                    | 37.572     | 0.00    | 0.058                | 0.045                  | 1.28              |
| <chem>C\C=C\c1ccccc1</chem>  | 585                        | 8786                          | 10150                   | 322742                    | 305.982    | 0.00    | 0.054                | 0.027                  | 2.06              |
| <chem>CCN(CC)CCNC</chem>     | 550                        | 14244                         | 10185                   | 317284                    | 17.195     | 0.00    | 0.051                | 0.043                  | 1.19              |
| <chem>ON(=O)c1ccccc1</chem>  | 533                        | 14382                         | 10202                   | 317146                    | 9.807      | 0.00    | 0.050                | 0.043                  | 1.14              |
| <chem>OC(=O)c1ccccc1</chem>  | 506                        | 15062                         | 10229                   | 316466                    | 0.695      | 0.40    | 0.047                | 0.045                  | 1.04              |
| <chem>c:c1ccccc1:c</chem>    | 487                        | 11729                         | 10248                   | 319799                    | 30.133     | 0.00    | 0.045                | 0.035                  | 1.28              |
| <chem>O=C\C=C\c1ccco1</chem> | 460                        | 342                           | 10275                   | 331186                    | 7778.789   | 0.00    | 0.043                | 0.001                  | 41.54             |

|                                 |     |       |       |        |          |      |       |       |       |
|---------------------------------|-----|-------|-------|--------|----------|------|-------|-------|-------|
| <chem>S=CNc1cccc1</chem>        | 434 | 5614  | 10301 | 325914 | 330.671  | 0.00 | 0.040 | 0.017 | 2.39  |
| <chem>COc1ccc(N)cc1</chem>      | 428 | 17033 | 10307 | 314495 | 28.443   | 0.00 | 0.040 | 0.051 | 0.78  |
| <chem>COCc1cccc1</chem>         | 407 | 12850 | 10328 | 318678 | 0.200    | 0.65 | 0.038 | 0.039 | 0.98  |
| <chem>CCc1cccc1C</chem>         | 371 | 6556  | 10364 | 324972 | 114.626  | 0.00 | 0.035 | 0.020 | 1.75  |
| <chem>c:c:c1cccc1:c</chem>      | 318 | 6408  | 10417 | 325120 | 57.195   | 0.00 | 0.030 | 0.019 | 1.53  |
| <chem>CCSc1cccc1</chem>         | 308 | 5450  | 10427 | 326078 | 94.372   | 0.00 | 0.029 | 0.016 | 1.75  |
| <chem>CCCCCCCCNC</chem>         | 293 | 10635 | 10442 | 320893 | 7.702    | 0.01 | 0.027 | 0.032 | 0.85  |
| <chem>Nc1cccc(O)c1</chem>       | 256 | 10850 | 10479 | 320678 | 26.117   | 0.00 | 0.024 | 0.033 | 0.73  |
| <chem>c1cc2ccccc2n1</chem>      | 255 | 10028 | 10480 | 321500 | 15.047   | 0.00 | 0.024 | 0.030 | 0.79  |
| <chem>CCNC(=O)c1ccco1</chem>    | 252 | 4052  | 10483 | 327476 | 106.032  | 0.00 | 0.023 | 0.012 | 1.92  |
| <chem>CNCc1ccc(C)o1</chem>      | 225 | 1136  | 10510 | 330392 | 807.055  | 0.00 | 0.021 | 0.003 | 6.12  |
| <chem>c1coc(n1)-c1cccc1</chem>  | 218 | 1868  | 10517 | 329660 | 369.568  | 0.00 | 0.020 | 0.006 | 3.60  |
| <chem>C=C1C(=O)NCNC1=O</chem>   | 213 | 913   | 10522 | 330615 | 925.941  | 0.00 | 0.020 | 0.003 | 7.20  |
| <chem>CCCCCCCCC</chem>          | 195 | 4645  | 10540 | 326883 | 12.870   | 0.00 | 0.018 | 0.014 | 1.30  |
| <chem>c1nc2ccccc2n1</chem>      | 193 | 7615  | 10542 | 323913 | 11.618   | 0.00 | 0.018 | 0.023 | 0.78  |
| <chem>Cc1ccc(o1)-c1cccc1</chem> | 185 | 939   | 10550 | 330589 | 658.825  | 0.00 | 0.017 | 0.003 | 6.08  |
| <chem>c1enn(c1)-c1cccc1</chem>  | 147 | 6855  | 10588 | 324673 | 25.306   | 0.00 | 0.014 | 0.021 | 0.66  |
| <chem>CCS(=O)Cc1ncoc1C</chem>   | 146 | 218   | 10589 | 331310 | 1639.609 | 0.00 | 0.014 | 0.001 | 20.68 |
| <chem>C\C=C\Nc1cccc1</chem>     | 144 | 2317  | 10591 | 329211 | 60.134   | 0.00 | 0.013 | 0.007 | 1.92  |
| <chem>CCCN1CCCCC1</chem>        | 139 | 4218  | 10596 | 327310 | 0.042    | 0.84 | 0.013 | 0.013 | 1.02  |
| <chem>CSc1nccc(C)n1</chem>      | 138 | 1853  | 10597 | 329675 | 94.921   | 0.00 | 0.013 | 0.006 | 2.30  |
| <chem>c1ccc2ncnc2c1</chem>      | 138 | 2903  | 10597 | 328625 | 19.837   | 0.00 | 0.013 | 0.009 | 1.47  |
| <chem>c:c:c1occcc1:c</chem>     | 129 | 6067  | 10606 | 325461 | 23.095   | 0.00 | 0.012 | 0.018 | 0.66  |
| <chem>CCSc1nnen1C</chem>        | 122 | 3475  | 10613 | 328053 | 0.780    | 0.38 | 0.011 | 0.010 | 1.08  |
| <chem>Cc1cccn1-c1cccc1</chem>   | 121 | 973   | 10614 | 330555 | 226.818  | 0.00 | 0.011 | 0.003 | 3.84  |
| <chem>COc1ccc(O)cc1</chem>      | 120 | 5544  | 10615 | 325984 | 19.639   | 0.00 | 0.011 | 0.017 | 0.67  |
| <chem>CCCN1CCOCC1</chem>        | 115 | 2510  | 10620 | 329018 | 13.485   | 0.00 | 0.011 | 0.008 | 1.41  |
| <chem>CC(O)c1cccc1</chem>       | 110 | 2536  | 10625 | 328992 | 9.145    | 0.00 | 0.010 | 0.008 | 1.34  |
| <chem>O=S(=O)Cc1cccc1</chem>    | 107 | 914   | 10628 | 330614 | 181.769  | 0.00 | 0.010 | 0.003 | 3.62  |

|                     |     |      |       |        |          |      |       |       |       |
|---------------------|-----|------|-------|--------|----------|------|-------|-------|-------|
| CNCCc1ccncc1        | 104 | 2356 | 10631 | 329172 | 9.711    | 0.00 | 0.010 | 0.007 | 1.36  |
| c1cc2cnenc2s1       | 103 | 3747 | 10632 | 327781 | 2.726    | 0.10 | 0.010 | 0.011 | 0.85  |
| CCc1c(C)csc1C       | 101 | 1971 | 10634 | 329557 | 20.727   | 0.00 | 0.009 | 0.006 | 1.58  |
| CCCCC(=O)OCC        | 101 | 2624 | 10634 | 328904 | 2.937    | 0.09 | 0.009 | 0.008 | 1.19  |
| Cc1cc(C=O)c(N)s1    | 100 | 2151 | 10635 | 329377 | 12.721   | 0.00 | 0.009 | 0.006 | 1.44  |
| Cc1ccsc1NC=O        | 97  | 2788 | 10638 | 328740 | 0.488    | 0.48 | 0.009 | 0.008 | 1.07  |
| COC(=O)C(C)=C(C)N   | 92  | 1585 | 10643 | 329943 | 30.621   | 0.00 | 0.009 | 0.005 | 1.79  |
| CC(=O)Nc1nccs1      | 88  | 3415 | 10647 | 328113 | 4.541    | 0.03 | 0.008 | 0.010 | 0.80  |
| Cc1cc(O)ccc1O       | 86  | 1448 | 10649 | 330080 | 30.938   | 0.00 | 0.008 | 0.004 | 1.83  |
| CNCCc1ccccc1        | 86  | 1874 | 10649 | 329654 | 10.159   | 0.00 | 0.008 | 0.006 | 1.42  |
| c:c:c1ncccc1:c      | 84  | 7956 | 10651 | 323572 | 118.570  | 0.00 | 0.008 | 0.024 | 0.33  |
| CCCC(=O)NC(C)C      | 83  | 3928 | 10652 | 327600 | 15.214   | 0.00 | 0.008 | 0.012 | 0.65  |
| NC(=O)c1ccccc1      | 82  | 4664 | 10653 | 326864 | 31.436   | 0.00 | 0.008 | 0.014 | 0.54  |
| Cc1ccc(o1)N(O)=O    | 81  | 152  | 10654 | 331376 | 767.677  | 0.00 | 0.008 | 0.000 | 16.46 |
| CNNc1ccccc1         | 81  | 784  | 10654 | 330744 | 110.705  | 0.00 | 0.008 | 0.002 | 3.19  |
| c1ccc(cc1)-c1ccccc1 | 81  | 2557 | 10654 | 328971 | 0.038    | 0.85 | 0.008 | 0.008 | 0.98  |
| CCCCN(C)S(=O)=O     | 81  | 9898 | 10654 | 321630 | 182.850  | 0.00 | 0.008 | 0.030 | 0.25  |
| N\N=C\c1ccccc1      | 80  | 6383 | 10655 | 325145 | 78.164   | 0.00 | 0.007 | 0.019 | 0.39  |
| Cc1cccc(=O)n1C      | 77  | 476  | 10658 | 331052 | 212.164  | 0.00 | 0.007 | 0.001 | 5.00  |
| Cc1ccc(N)c(C)c1     | 77  | 2700 | 10658 | 328828 | 1.219    | 0.27 | 0.007 | 0.008 | 0.88  |
| O=[S]NCCc1ccco1     | 76  | 290  | 10659 | 331238 | 374.780  | 0.00 | 0.007 | 0.001 | 8.09  |
| NNC(=O)c1ccccc1     | 75  | 4957 | 10660 | 326571 | 45.545   | 0.00 | 0.007 | 0.015 | 0.47  |
| CN\N=C\c1ccco1      | 74  | 624  | 10661 | 330904 | 128.300  | 0.00 | 0.007 | 0.002 | 3.66  |
| N=C\C=C\c1ccco1     | 71  | 47   | 10664 | 331481 | 1263.811 | 0.00 | 0.007 | 0.000 | 46.65 |
| c1coc(c1)-c1ncnn1   | 71  | 520  | 10664 | 331008 | 153.559  | 0.00 | 0.007 | 0.002 | 4.22  |
| COC1CCC=C(C)O1      | 70  | 433  | 10665 | 331095 | 192.683  | 0.00 | 0.007 | 0.001 | 4.99  |
| CCCC\C=C\CC=C       | 68  | 673  | 10667 | 330855 | 89.182   | 0.00 | 0.006 | 0.002 | 3.12  |
| C=NNc1ccccc1        | 68  | 1661 | 10667 | 329867 | 3.628    | 0.06 | 0.006 | 0.005 | 1.26  |
| SCNc1ccccc1         | 67  | 1600 | 10668 | 329928 | 4.296    | 0.04 | 0.006 | 0.005 | 1.29  |

|                                      |    |      |       |        |          |      |       |       |        |
|--------------------------------------|----|------|-------|--------|----------|------|-------|-------|--------|
| <chem>O=C1NCC2CC=CCC12</chem>        | 64 | 903  | 10671 | 330625 | 38.698   | 0.00 | 0.006 | 0.003 | 2.19   |
| <chem>Cc1cc(:c)c(:c:c)o1</chem>      | 63 | 2701 | 10672 | 328827 | 6.739    | 0.01 | 0.006 | 0.008 | 0.72   |
| <chem>CC(=O)N1CCCCC1</chem>          | 63 | 4783 | 10672 | 326745 | 54.566   | 0.00 | 0.006 | 0.014 | 0.41   |
| <chem>NC(=S)NCc1ccco1</chem>         | 62 | 468  | 10673 | 331060 | 128.074  | 0.00 | 0.006 | 0.001 | 4.09   |
| <chem>c1coc(c1)-c1cccn1</chem>       | 61 | 20   | 10674 | 331508 | 1389.073 | 0.00 | 0.006 | 0.000 | 94.19  |
| <chem>CCN(CC)C(=O)CS</chem>          | 61 | 2922 | 10674 | 328606 | 11.802   | 0.00 | 0.006 | 0.009 | 0.64   |
| <chem>C1CCc2sccc2C1</chem>           | 58 | 1727 | 10677 | 329801 | 0.075    | 0.78 | 0.005 | 0.005 | 1.04   |
| <chem>CS(=O)(=O)c1cccs1</chem>       | 57 | 72   | 10678 | 331456 | 715.761  | 0.00 | 0.005 | 0.000 | 24.45  |
| <chem>CCCCCOC(C)=O</chem>            | 57 | 1009 | 10678 | 330519 | 17.200   | 0.00 | 0.005 | 0.003 | 1.74   |
| <chem>Cn1ccc(=O)n(C)c1</chem>        | 55 | 4313 | 10680 | 327215 | 51.326   | 0.00 | 0.005 | 0.013 | 0.39   |
| <chem>NC=C1C=CC(=O)C=C1</chem>       | 54 | 960  | 10681 | 330568 | 16.040   | 0.00 | 0.005 | 0.003 | 1.74   |
| <chem>Nc1nc(:c)c(:c:c)s1</chem>      | 51 | 2523 | 10684 | 329005 | 11.390   | 0.00 | 0.005 | 0.008 | 0.62   |
| <chem>CCN1CSC(=C)C1=O</chem>         | 50 | 1106 | 10685 | 330422 | 5.395    | 0.02 | 0.005 | 0.003 | 1.40   |
| <chem>CCN1ncccc1=O</chem>            | 50 | 1811 | 10685 | 329717 | 1.246    | 0.26 | 0.005 | 0.005 | 0.85   |
| <chem>CC(=O)NCc1cccs1</chem>         | 48 | 1208 | 10687 | 330320 | 1.948    | 0.16 | 0.004 | 0.004 | 1.23   |
| <chem>NC=C1C=CC=CC1=O</chem>         | 48 | 1690 | 10687 | 329838 | 0.807    | 0.37 | 0.004 | 0.005 | 0.88   |
| <chem>c1nnc(n1)-c1ccccc1</chem>      | 46 | 2903 | 10689 | 328625 | 24.338   | 0.00 | 0.004 | 0.009 | 0.49   |
| <chem>CCCC1cccn1C</chem>             | 44 | 212  | 10691 | 331316 | 166.486  | 0.00 | 0.004 | 0.001 | 6.41   |
| <chem>NC(=O)c1cc(:c)cs1</chem>       | 43 | 1832 | 10692 | 329696 | 4.412    | 0.04 | 0.004 | 0.006 | 0.72   |
| <chem>Clc1cnnc(=O)c1Cl</chem>        | 41 | 4    | 10694 | 331524 | 1146.521 | 0.00 | 0.004 | 0.000 | 316.55 |
| <chem>c1nnc(o1)-c1ccccc1</chem>      | 41 | 1937 | 10694 | 329591 | 7.409    | 0.01 | 0.004 | 0.006 | 0.65   |
| <chem>CNC1C2SCC(C)=C(C)N2C1=O</chem> | 40 | 20   | 10695 | 331508 | 797.233  | 0.00 | 0.004 | 0.000 | 61.77  |
| <chem>Cc1cncc(C)c1C</chem>           | 39 | 391  | 10696 | 331137 | 49.889   | 0.00 | 0.004 | 0.001 | 3.08   |
| <chem>CN(C)c1ncnc(N)n1</chem>        | 39 | 919  | 10696 | 330609 | 2.761    | 0.10 | 0.004 | 0.003 | 1.31   |
| <chem>CCN(C)C1CCCCC1</chem>          | 39 | 1522 | 10696 | 330006 | 2.102    | 0.15 | 0.004 | 0.005 | 0.79   |
| <chem>COC(=O)c1ccco1</chem>          | 38 | 820  | 10697 | 330708 | 4.729    | 0.03 | 0.004 | 0.002 | 1.43   |
| <chem>CSc1ccc(Cl)cc1</chem>          | 37 | 728  | 10698 | 330800 | 7.294    | 0.01 | 0.003 | 0.002 | 1.57   |
| <chem>O=CCSc1cccn1</chem>            | 36 | 1234 | 10699 | 330294 | 0.382    | 0.54 | 0.003 | 0.004 | 0.90   |

|                        |    |      |       |        |         |      |       |       |        |
|------------------------|----|------|-------|--------|---------|------|-------|-------|--------|
| CCSCc1cccc1            | 36 | 1601 | 10699 | 329927 | 4.757   | 0.03 | 0.003 | 0.005 | 0.69   |
| CC1=C(N)OC(C)=C<br>C1  | 35 | 244  | 10700 | 331284 | 81.354  | 0.00 | 0.003 | 0.001 | 4.43   |
| FC(F)(F)c1ccnc(S)n1    | 34 | 304  | 10701 | 331224 | 53.370  | 0.00 | 0.003 | 0.001 | 3.45   |
| c1nc2cncnc2n1          | 34 | 3016 | 10701 | 328512 | 41.403  | 0.00 | 0.003 | 0.009 | 0.35   |
| c1coc(c1)-c1ncco1      | 33 | 136  | 10702 | 331392 | 149.508 | 0.00 | 0.003 | 0.000 | 7.49   |
| c:c:c:c1cncn1:c        | 31 | 259  | 10704 | 331269 | 54.503  | 0.00 | 0.003 | 0.001 | 3.70   |
| O=C\C=C\c1cccs1        | 31 | 422  | 10704 | 331106 | 20.515  | 0.00 | 0.003 | 0.001 | 2.27   |
| Cc1ccnc2ccnn12         | 31 | 878  | 10704 | 330650 | 0.225   | 0.64 | 0.003 | 0.003 | 1.09   |
| c1coc(c1)-c1ccnn1      | 30 | 92   | 10705 | 331436 | 184.891 | 0.00 | 0.003 | 0.000 | 10.07  |
| CC1(C)CC(=O)CC(=O)C1   | 30 | 215  | 10705 | 331313 | 66.952  | 0.00 | 0.003 | 0.001 | 4.31   |
| Cc1cc(C)n(C)c1C        | 30 | 1034 | 10705 | 330494 | 0.353   | 0.55 | 0.003 | 0.003 | 0.90   |
| O=c1ccnc2ccccc12       | 30 | 1303 | 10705 | 330225 | 3.457   | 0.06 | 0.003 | 0.004 | 0.71   |
| CCn1c(C)ccc1C          | 29 | 561  | 10706 | 330967 | 6.155   | 0.01 | 0.003 | 0.002 | 1.60   |
| Cc1cc(C)cc(N)c1        | 29 | 1627 | 10706 | 329901 | 10.511  | 0.00 | 0.003 | 0.005 | 0.55   |
| CCSCc1ccco1            | 28 | 32   | 10707 | 331496 | 374.288 | 0.00 | 0.003 | 0.000 | 27.02  |
| COC1=CCC=CC1=O         | 27 | 460  | 10708 | 331068 | 9.305   | 0.00 | 0.003 | 0.001 | 1.81   |
| Cn1nnc2ccccc12         | 27 | 582  | 10708 | 330946 | 3.378   | 0.07 | 0.003 | 0.002 | 1.43   |
| CCc1sc(cc1C):n:c       | 27 | 904  | 10708 | 330624 | 0.172   | 0.68 | 0.003 | 0.003 | 0.92   |
| COC(=O)c1cccs1         | 27 | 1241 | 10708 | 330287 | 4.249   | 0.04 | 0.003 | 0.004 | 0.67   |
| Sc1nnnn1-c1ccccc1      | 25 | 729  | 10710 | 330799 | 0.080   | 0.78 | 0.002 | 0.002 | 1.06   |
| Cc1cc(C)c(C)cn1        | 25 | 758  | 10710 | 330770 | 0.008   | 0.93 | 0.002 | 0.002 | 1.02   |
| c:c:c1cncccc1:c        | 25 | 956  | 10710 | 330572 | 1.120   | 0.29 | 0.002 | 0.003 | 0.81   |
| CCn1nc(C)cc1C          | 25 | 1013 | 10710 | 330515 | 1.816   | 0.18 | 0.002 | 0.003 | 0.76   |
| CC(=C)\C=C\c1ccco<br>1 | 24 | 17   | 10711 | 331511 | 414.243 | 0.00 | 0.002 | 0.000 | 43.60  |
| Cc1ccc(o1)C(O)=O       | 24 | 329  | 10711 | 331199 | 15.601  | 0.00 | 0.002 | 0.001 | 2.25   |
| NCCCn1ccnc1            | 23 | 1136 | 10712 | 330392 | 5.080   | 0.02 | 0.002 | 0.003 | 0.63   |
| COC(=O)N1N(C)CC<br>1=O | 22 | 2    | 10713 | 331526 | 619.187 | 0.00 | 0.002 | 0.000 | 339.71 |
| COC(=O)c1ccoc1C        | 22 | 302  | 10713 | 331226 | 14.250  | 0.00 | 0.002 | 0.001 | 2.25   |

|                                               |    |      |       |        |         |      |       |       |        |
|-----------------------------------------------|----|------|-------|--------|---------|------|-------|-------|--------|
| CCSc1nnnn1C                                   | 22 | 546  | 10713 | 330982 | 1.017   | 0.31 | 0.002 | 0.002 | 1.24   |
| OC1CCC=C(O1)C(=O)NCC#C                        | 21 | 20   | 10714 | 331508 | 312.045 | 0.00 | 0.002 | 0.000 | 32.43  |
| c1coc(c1)-c1csn1                              | 21 | 27   | 10714 | 331501 | 260.640 | 0.00 | 0.002 | 0.000 | 24.02  |
| CC(=O)Nc1cccn1                                | 21 | 820  | 10714 | 330708 | 1.135   | 0.29 | 0.002 | 0.002 | 0.79   |
| NC(=O)C1CCCNC1                                | 21 | 2965 | 10714 | 328563 | 58.701  | 0.00 | 0.002 | 0.009 | 0.22   |
| Cn1cnc(c1S)N(O)=O                             | 20 | 11   | 10715 | 331517 | 384.457 | 0.00 | 0.002 | 0.000 | 56.15  |
| Cn1csc2ccccc12                                | 20 | 478  | 10715 | 331050 | 1.270   | 0.26 | 0.002 | 0.001 | 1.29   |
| NCCc1cccn1                                    | 20 | 766  | 10715 | 330762 | 0.909   | 0.34 | 0.002 | 0.002 | 0.81   |
| CSc1nc(O)c(C(c2ccc2)c2c(O)nc(SC)nc2=O)c(=O)n1 | 19 | 1    | 10716 | 331527 | 555.571 | 0.00 | 0.002 | 0.000 | 586.78 |
| Cn1coc(:c)c1:c:c                              | 19 | 984  | 10716 | 330544 | 5.109   | 0.02 | 0.002 | 0.003 | 0.60   |
| COc1ccccc1NS(=O)=O                            | 19 | 1122 | 10716 | 330406 | 8.157   | 0.00 | 0.002 | 0.003 | 0.52   |
| CNS(=O)(=O)c1cccs1                            | 19 | 1505 | 10716 | 330023 | 17.994  | 0.00 | 0.002 | 0.005 | 0.39   |
| c1cc2ccccc2c1                                 | 18 | 203  | 10717 | 331325 | 18.258  | 0.00 | 0.002 | 0.001 | 2.74   |
| Cc1ccccc1CS                                   | 18 | 458  | 10717 | 331070 | 0.653   | 0.42 | 0.002 | 0.001 | 1.21   |
| Cc1ccnc1C(O)=O                                | 18 | 712  | 10717 | 330816 | 1.083   | 0.30 | 0.002 | 0.002 | 0.78   |
| NC(=O)NC1CCCCC1                               | 18 | 1265 | 10717 | 330263 | 12.738  | 0.00 | 0.002 | 0.004 | 0.44   |
| CC#Cc1ccccc1                                  | 17 | 140  | 10718 | 331388 | 30.586  | 0.00 | 0.002 | 0.000 | 3.75   |
| Cc1nc(N)nc(N)n1                               | 17 | 328  | 10718 | 331200 | 3.646   | 0.06 | 0.002 | 0.001 | 1.60   |
| CCSc1ncenn1                                   | 17 | 574  | 10718 | 330954 | 0.132   | 0.72 | 0.002 | 0.002 | 0.91   |
| c1nnc2ccenn12                                 | 17 | 836  | 10718 | 330692 | 3.681   | 0.06 | 0.002 | 0.003 | 0.63   |
| CNc1nccc(C)n1                                 | 17 | 1086 | 10718 | 330442 | 9.269   | 0.00 | 0.002 | 0.003 | 0.48   |
| NC(=O)CSc1ncnn1                               | 17 | 1409 | 10718 | 330119 | 17.818  | 0.00 | 0.002 | 0.004 | 0.37   |
| ON(=O)C(=C)C(Cl)=C(Cl)Cl                      | 16 | 4    | 10719 | 331524 | 388.950 | 0.00 | 0.001 | 0.000 | 123.53 |
| CNc1nnc(s1)S(=O)(=O)NC                        | 16 | 302  | 10719 | 331226 | 3.762   | 0.05 | 0.001 | 0.001 | 1.64   |
| Sc1nc2ccccc2s1                                | 16 | 658  | 10719 | 330870 | 1.293   | 0.26 | 0.001 | 0.002 | 0.75   |
| CS(=O)(=O)Cc1ccco                             | 15 | 68   | 10720 | 331460 | 60.959  | 0.00 | 0.001 | 0.000 | 6.81   |

|                                |    |      |       |        |         |      |       |       |        |
|--------------------------------|----|------|-------|--------|---------|------|-------|-------|--------|
| 1                              |    |      |       |        |         |      |       |       |        |
| CNN1C(=O)CSC1=S                | 15 | 104  | 10720 | 331424 | 35.129  | 0.00 | 0.001 | 0.000 | 4.45   |
| Oc1ccc(cc1)N=C                 | 15 | 135  | 10720 | 331393 | 23.269  | 0.00 | 0.001 | 0.000 | 3.43   |
| CN(C(C)=O)c1c(N)n(C)c(=O)nc1=O | 15 | 1007 | 10720 | 330521 | 9.396   | 0.00 | 0.001 | 0.003 | 0.46   |
| Nc1cnen1:c:c:c                 | 14 | 395  | 10721 | 331133 | 0.111   | 0.74 | 0.001 | 0.001 | 1.09   |
| c1nnc2ncccc12                  | 14 | 1318 | 10721 | 330210 | 19.142  | 0.00 | 0.001 | 0.004 | 0.33   |
| CSc1nnc(-c2ccco2)c(n1)-c1ccco1 | 13 | 1    | 10722 | 331527 | 370.961 | 0.00 | 0.001 | 0.000 | 401.48 |
| Cc1cc(=O)c(O)co1               | 13 | 212  | 10722 | 331316 | 5.170   | 0.02 | 0.001 | 0.001 | 1.89   |
| CC1=C(N)Oc2nncc2C1             | 13 | 261  | 10722 | 331267 | 2.334   | 0.13 | 0.001 | 0.001 | 1.54   |
| CNC(C)CCCCN                    | 13 | 391  | 10722 | 331137 | 0.009   | 0.93 | 0.001 | 0.001 | 1.03   |
| Cc1cc2cccn2s1                  | 13 | 675  | 10722 | 330853 | 3.528   | 0.06 | 0.001 | 0.002 | 0.59   |
| Cc1nc(oc1C)-c1cccs1            | 12 | 21   | 10723 | 331507 | 119.933 | 0.00 | 0.001 | 0.000 | 17.65  |
| CC=C1C(C)CCC=C1C               | 12 | 30   | 10723 | 331498 | 89.446  | 0.00 | 0.001 | 0.000 | 12.35  |
| ON(=O)c1ccccc1                 | 12 | 156  | 10723 | 331372 | 8.880   | 0.00 | 0.001 | 0.000 | 2.38   |
| c1csc(c1)-c1ccccc1             | 12 | 855  | 10723 | 330673 | 8.786   | 0.00 | 0.001 | 0.003 | 0.43   |
| Clc1ncsc1\C=C\N\NC=O           | 11 | 4    | 10724 | 331524 | 243.301 | 0.00 | 0.001 | 0.000 | 84.93  |
| O=C1NC(=S)SC1=C\C=C\c1ccco1    | 11 | 0    | 10724 | 331528 | 339.723 | 0.00 | 0.001 | 0.000 | 0.00   |
