# Supplementary material for: Cheminformatics Models for Inhibitors of Schistosoma mansoni Thioredoxin Glutathione Reductase
Source: ScientificWorldJournal. 2014 Nov 25;2014:957107. doi: 10.1155/2014/957107 (PMC4275605; doi:10.1155/2014/957107)
Supplement: Supplementary file 1 — Supplementary Table 1 contains the detailed information of all descriptors included in the three major descriptors (Pharmacophore fingerprints, Weighted burden and Properties) used in our study. Supplementary Table 2 shows 177 scaffolds which have frequency greater than 0.1 percent in actives. These scaffolds were selected for further analysis. Additional File contains the docking scores of molecules from AID485634 and ZINC which were predicted active by Random Forest model and contains one of the enriched scaffolds. It also shows the docking scores of ZINC molecules predicted inactive by the model and the ones which were predicted active but do not contain any enriched substructure. [file 957107.f1.zip]

Archive with 3 entries (3 files):
- Additional File.pdf
- Supplementary Table 1.pdf
- Supplementary Table 2.pdf
